# Supplementary material for: Laser ablation inductively coupled plasma mass spectrometry (LA-ICP-MS) U–Pb carbonate geochronology: strategies, progress, and limitations
Source: Copernicus journal article supplement (doi:10.5194/gchron-2-33-2020), 2020-04-09
Supplement: Supplementary file 1 [file Carbonate Strategies Supplement S1.xlsx]

## Sheet: SC-ICP-MS Fig 7a 7c
Date	Spot	comments	204Pb* cps	206Pb cps	207Pb cps	208Pb cps	232Th cps	238U cps	Th/U	Pb ppm	Th ppm	U ppm	238U/206Pb	1s %	207Pb/206Pb	1s %	207Pb/235U	1s %	206Pb/238U	1s %	Rho	207Pb/206Pb	2s abs	206Pb/238U	2s abs	207Pb/235U	2s abs
2019-04-26	NIST614_01		22045.3	400191	351716	853145	192850	469412	0.410833	1.35348	0.288355	0.701879	1.49823	1.06951	0.868559	0.411983	79.8965	1.14611	0.667455	1.06951	0.93316	5038.54	11.675	3296.04	54.96	4460.75	22.7308
2019-04-26	NIST614_02		21614.3	392499	345287	832930	191645	464730	0.41238	1.32453	0.286554	0.694877	1.5015	1.05371	0.868311	0.411387	79.6998	1.13117	0.666003	1.05371	0.931522	5038.14	11.6583	3290.42	54.081	4458.28	22.437
2019-04-26	NIST614_03		21768.1	394020	345044	833737	191939	463886	0.413764	1.32629	0.286993	0.693616	1.51121	1.04971	0.869451	0.41654	79.2913	1.12933	0.661721	1.04971	0.929494	5039.99	11.8033	3273.83	53.669	4453.13	22.3995
2019-04-26	NIST614_04		15654	283030	246529	602246	144240	348384	0.414025	0.954412	0.215672	0.520914	1.42275	1.09489	0.871954	0.423479	84.4641	1.17393	0.702866	1.09489	0.932668	5044.07	11.9979	3431.51	58.0035	4516.52	23.2916
2019-04-26	NIST614_05		15011	264542	232594	561928	138146	328828	0.420118	0.893071	0.20656	0.491673	1.43392	1.0574	0.871774	0.417014	83.7888	1.13666	0.69739	1.0574	0.93027	5043.77	11.8148	3410.75	55.7703	4508.47	22.5583
2019-04-26	NIST614_06		16489.3	284041	250224	607706	144535	357048	0.404806	0.962985	0.216113	0.533869	1.44024	1.05239	0.87235	0.436013	83.476	1.13914	0.694328	1.05239	0.923849	5044.71	12.3526	3399.11	55.3639	4504.71	22.6059
2019-04-26	WC1_01		655.823	157952	17868.7	24843.6	184.259	2861745	6.4387e-05	0.169214	0.00027551	4.27896	23.0739	1.02293	0.110969	0.761428	0.662806	1.27521	0.043339	1.02293	0.802168	1815.34	27.6536	273.497	5.47603	516.329	10.2704
2019-04-26	WC1_02		660.53	176821	14658.6	14395.4	399.074	3311822	0.0001205	0.173607	0.000596707	4.95193	24.0214	1.03454	0.0826216	0.680714	0.474025	1.2384	0.0416295	1.03454	0.83538	1260.29	26.607	262.926	5.32846	393.965	8.05551
2019-04-26	WC1_03		496.518	156115	13710.4	14700.6	406.481	2924010	0.000139015	0.155604	0.000607783	4.37207	23.6913	1.03367	0.0871289	0.653855	0.506849	1.22311	0.0422096	1.03367	0.845115	1363.35	25.1894	266.514	5.39514	416.328	8.32057
2019-04-26	WC1_04		362.884	143772	13033.6	14302.7	335.714	2679555	0.000125287	0.144289	0.00050197	4.00655	23.725	1.06201	0.0892066	0.952637	0.5182	1.42667	0.0421497	1.06201	0.744399	1408.6	36.4715	266.144	5.53548	423.948	9.84114
2019-04-26	WC1_05		248.628	161068	13566.3	13388.8	386.607	3149300	0.00012276	0.158553	0.000578066	4.70893	24.4657	1.04575	0.0835694	1.20212	0.470755	1.59333	0.0408735	1.04575	0.656332	1282.55	46.8387	258.245	5.29228	391.711	10.3042
2019-04-26	WC1_06		756.796	176396	15459.5	16971.5	553.636	3312932	0.000167114	0.176097	0.000827813	4.95359	23.7595	1.03259	0.0884106	1.51201	0.512829	1.83096	0.0420884	1.03259	0.563963	1391.42	58.0236	265.765	5.3747	420.349	12.5268
2019-04-26	WC1_07		267.614	158725	13940.6	14936.6	528.571	3146933	0.000167964	0.158198	0.000790335	4.70539	23.59	1.05714	0.0859454	1.97914	0.502111	2.24377	0.0423908	1.05714	0.471142	1336.95	76.5258	267.635	5.5403	413.131	15.1182
2019-04-26	WC1_08		743.435	192988	23760.7	36810.7	3374.11	3649781	0.000924468	0.213818	0.00504506	5.45726	22.5041	1.15713	0.115255	4.09517	0.705835	4.25551	0.0444363	1.15713	0.271913	1883.87	147.499	280.273	6.34413	542.27	35.1431
2019-04-26	WC1_09		976.754	175738	20990.8	31406.2	1765.18	3342096	0.000528165	0.192379	0.00263935	4.9972	22.4942	1.02847	0.117606	1.21852	0.72055	1.59454	0.0444559	1.02847	0.644997	1920.16	43.6987	280.394	5.64144	550.991	13.4712
2019-04-26	WC1_10		450.846	237516	18857.9	17210.2	5124.55	4732465	0.00108285	0.230704	0.00766237	7.07612	23.9472	1.03024	0.0804917	1.30634	0.463237	1.66371	0.0417586	1.03024	0.619247	1209.06	51.4376	263.724	5.32216	386.507	10.6401
2019-04-26	WC1_11		580.597	130232	13844.1	18817.2	167.647	2519757	6.6533e-05	0.137362	0.000250671	3.76761	22.9632	1.03202	0.103898	1.36078	0.623564	1.70787	0.043548	1.03202	0.604277	1694.89	50.1677	274.787	5.55017	492.078	13.234
2019-04-26	WC1_12		469.438	138348	14110.9	18435.7	289.091	2697728	0.000107161	0.14411	0.000432257	4.03372	23.0681	1.04054	0.103437	1.24518	0.617976	1.62272	0.0433499	1.04054	0.641236	1686.69	45.9535	273.564	5.5716	488.578	12.509
2019-04-26	WC1_13		1847.53	191958	33244.8	57492.6	1163.64	3212133	0.000362263	0.238387	0.0017399	4.80288	21.2549	1.06768	0.17284	1.10876	1.12071	1.53925	0.047048	1.06768	0.693636	2585.34	37.0155	296.372	6.18236	763.314	16.3859
2019-04-26	WC1_14		2182.97	237234	41969.1	77124.6	5838.18	3949771	0.00147811	0.300478	0.00872942	5.90581	21.1487	1.05759	0.174984	0.878974	1.1403	1.37517	0.0472842	1.05759	0.769061	2605.9	29.2859	297.826	6.15332	772.654	14.7706
2019-04-26	WC1_15		1645.32	236376	34816.1	57089	806.481	4140441	0.000194782	0.276828	0.00120587	6.19091	22.3492	1.02124	0.146476	0.934547	0.903255	1.3843	0.0447444	1.02124	0.737724	2305.18	32.0981	282.174	5.63654	653.466	13.2546
2019-04-26	WC1_16		1927.04	258672	43096	77878.2	8452.63	4491488	0.00188192	0.320142	0.0126386	6.7158	21.8605	1.08339	0.167572	1.0916	1.05645	1.53796	0.0457447	1.08339	0.704432	2533.53	36.6278	288.343	6.10721	732.07	15.9194
2019-04-26	WC1_17		943.399	187492	27778.4	47233.9	825.926	3392469	0.000243459	0.221361	0.00123495	5.07252	22.2005	1.05871	0.145987	0.677402	0.90627	1.25688	0.0450441	1.05871	0.842333	2299.44	23.2803	284.023	5.88071	655.073	12.0627
2019-04-26	WC1_18		1055.52	175916	23898.2	38193	424.546	3287025	0.000129158	0.200704	0.000634793	4.91486	22.7746	1.03605	0.133676	0.511122	0.808926	1.15527	0.0439086	1.03605	0.896805	2146.81	17.859	277.015	5.61601	601.852	10.4375
2019-04-26	WC1_19		1213.64	141312	24787	45880.3	337.736	2459995	0.000137291	0.178754	0.000504992	3.67826	21.3842	1.04722	0.174229	0.563128	1.12288	1.18902	0.0467634	1.04722	0.880737	2598.69	18.7755	294.62	6.02891	764.354	12.6923
2019-04-26	WC1_20		1498.29	217583	28917	46053.3	2624.04	4073569	0.000644162	0.2467	0.00392354	6.09092	22.6938	1.051	0.130632	0.654587	0.793322	1.23818	0.0440649	1.051	0.848828	2106.48	22.9751	277.98	5.71642	593.054	11.0628
2019-04-26	WC1_21		1105.24	174191	25742.4	43567.9	1142.11	3311117	0.00034493	0.205336	0.00170771	4.95088	22.0215	1.02571	0.146646	0.669061	0.917761	1.22463	0.0454101	1.02571	0.837566	2307.18	22.9748	286.28	5.74177	661.175	11.8323
2019-04-26	WC1_22		1164.34	158529	23568.5	38542.3	484.259	3046251	0.000158969	0.186058	0.000724079	4.55484	22.1872	1.05267	0.146347	0.975507	0.909048	1.43518	0.045071	1.05267	0.733478	2303.67	33.5103	284.189	5.85052	656.551	13.7843
2019-04-26	WC1_23		960.746	178931	23903.4	38691.6	4235.19	3537201	0.00119733	0.20367	0.00633257	5.28893	22.9964	1.0797	0.131771	0.990955	0.789708	1.46552	0.043485	1.0797	0.736735	2121.7	34.7218	274.399	5.79841	591.006	13.0479
2019-04-26	WC1_24		607.203	152137	18616.3	28053.8	1194.64	3025670	0.000394836	0.167647	0.00178627	4.52407	22.7846	1.05042	0.117885	1.03825	0.713055	1.47694	0.0438893	1.05042	0.711214	1924.41	37.2152	276.896	5.69146	546.559	12.4085
2019-04-26	TJN-0-1_Z3_01		145.713	181.647	117.029	302.327	4.54545	4962.53	0.000915955	0.000506804	6.7965e-06	0.00742012	35.0303	5.40362	0.614431	8.02824	2.41732	9.67738	0.0285467	5.40362	0.558377	4542.5	232.881	181.446	19.307	1247.76	130.288
2019-04-26	TJN-0-1_Z3_02		28.7707	149.163	80.5204	190.594	2.58621	5214.92	0.000495924	0.000354405	3.86697e-06	0.0077975	46.2078	6.3821	0.557734	8.35416	1.66348	10.513	0.0216414	6.3821	0.607068	4401.57	244.126	138.021	17.4065	994.705	125.282
2019-04-26	TJN-0-1_Z3_03		129.984	545.871	436.466	1088.84	224.51	3372.37	0.0665733	0.00174655	0.000335694	0.00504247	8.00612	4.06854	0.766052	3.52561	13.1869	5.38358	0.124904	4.06854	0.755731	4859.89	100.71	758.73	57.9822	2693.12	96.8522
2019-04-26	TJN-0-1_Z3_04		-188.827	115.104	62.1585	155.395	3.44828	4219.84	0.000817159	0.000280518	5.15596e-06	0.00630962	46.4855	6.02188	0.535614	8.51079	1.58796	10.4258	0.0215121	6.02188	0.577596	4342.35	249.5	137.205	16.3293	965.499	122.249
2019-04-26	TJN-0-1_Z3_05		265.704	104.372	58.9899	129.94	0.862069	4600.31	0.000187394	0.000247331	1.28899e-06	0.00687852	55.728	5.97159	0.664065	10.4043	1.64226	11.9962	0.0179443	5.97159	0.497788	4654.85	300.112	114.651	13.5576	986.583	141.137
2019-04-26	TJN-0-1_Z3_06	low counts	-112.637	108.66	43.9624	158.086	1.72414	3500.96	0.000492476	0.00026201	2.57798e-06	0.00523474	42.2922	7.29737	0.41622	12.6136	1.35634	14.5724	0.023645	7.29737	0.500766	3968.73	377.892	150.652	21.6957	870.295	157.474
2019-04-26	TJN-0-1_Z3_07		98.8227	154.469	75.3819	217.213	1.72414	4992.41	0.000345352	0.000376994	2.57798e-06	0.00746479	41.3924	4.992	0.4966	9.00076	1.65345	10.2924	0.024159	4.992	0.485017	4231.15	265.5	153.887	15.1643	990.873	122.543
2019-04-26	TJN-0-1_Z3_08		52.93	101.126	75.1515	215.984	2.58621	2731.56	0.000946787	0.00033078	3.86697e-06	0.00408431	33.8618	7.1514	0.823495	11.0463	3.35164	13.1591	0.0295318	7.1514	0.543455	4962.92	314.074	187.617	26.3937	1493.17	187.411
2019-04-26	TJN-0-1_Z3_09		116.294	127.225	79.8653	249.648	1.72414	2659.29	0.000648345	0.000385151	2.57798e-06	0.00397625	25.8962	6.5549	0.669252	9.89509	3.56172	11.8693	0.0386157	6.5549	0.552259	4666.07	285.266	244.247	31.3449	1541.05	172.651
2019-04-26	TJN-0-1_Z3_10		47.3363	131.056	82.9377	212.148	0.862069	2287.36	0.000376884	0.00035935	1.28899e-06	0.00342013	21.5729	6.37632	0.644786	7.72818	4.1192	10.0191	0.0463545	6.37632	0.636417	4612.32	223.389	292.101	36.3168	1658.12	151.787
2019-04-26	TJN-0-1_Z3_11		-98.1666	100.278	65.422	145.395	2.58621	1810.29	0.00142861	0.000262336	3.86697e-06	0.0027068	23.7723	6.9649	0.638117	9.76075	3.69943	11.9909	0.0420657	6.9649	0.580848	4597.29	282.354	265.625	36.1475	1571.25	175.594
2019-04-26	TJN-0-1_Z3_12		16.1398	103.791	56.639	170.849	bdl	2162.37	bdl	0.000279356	bdl	0.00323324	25.4447	6.1107	0.578978	11.6913	3.13596	13.1919	0.0393009	6.1107	0.463216	4456.11	340.657	248.498	29.7234	1441.56	185.166
2019-04-26	TJN-0-1_Z3_13	low counts	-119.913	89.4039	47.8672	165.72	5	2173.78	0.00230014	0.000255501	7.47615e-06	0.0032503	29.5443	7.7552	0.507542	16.1568	2.36758	17.9217	0.0338475	7.7552	0.432728	4263.26	475.724	214.584	32.6521	1232.87	228.197
2019-04-26	TJN-0-1_Z3_14		-83.9736	102.661	60.5351	152.875	3.44828	3572.52	0.000965222	0.000266531	5.15596e-06	0.00534174	44.0069	7.86676	0.591019	11.3483	1.85092	13.8083	0.0227237	7.86676	0.569712	4486.07	330.146	144.847	22.4961	1063.76	167.455
2019-04-26	TJN-0-1_Z3_15	low counts	44.6463	90.3151	73.5782	157.261	2.58621	2479.87	0.00104288	0.000270818	3.86697e-06	0.00370797	33.8816	8.83057	1.03249	11.9767	4.19981	14.8802	0.0295145	8.83057	0.593444	5282.27	335.976	187.509	32.5569	1673.98	218.724
2019-04-26	TJN-0-1_Z3_16	low counts	-191.739	81.3663	49.9418	134.486	0.862069	2369.93	0.000363754	0.000224135	1.28899e-06	0.00354358	36.5963	8.66651	0.678175	10.9464	2.55394	13.9618	0.0273251	8.66651	0.620728	4685.15	315.282	173.785	29.6516	1287.56	185.689
2019-04-26	TJN-0-1_Z3_17		-1.68369	106.195	76.7187	201.12	2.58621	1110.78	0.00232828	0.000323843	3.86697e-06	0.00166087	12.5809	5.67696	0.622771	8.50126	6.82218	10.2225	0.0794857	5.67696	0.555341	4562.04	246.357	493.052	53.6695	2088.61	166.608
2019-04-26	TJN-0-1_Z3_18		176.8	136.817	112.357	288.041	0.892857	1747.56	0.000510916	0.000453015	1.33503e-06	0.002613	15.3396	7.14585	0.762387	6.63368	6.84962	9.75032	0.0651906	7.14585	0.732883	4853.04	189.552	407.115	56.1393	2092.16	159.561
2019-04-26	TJN-0-1_Z3_19		68.247	74.7213	55.8273	146.304	0.862069	1933.28	0.00044591	0.00023346	1.28899e-06	0.0028907	31.2606	8.74038	0.712834	11.5477	3.14266	14.4825	0.0319892	8.74038	0.603512	4756.81	331.455	202.986	34.8363	1443.2	201.686
2019-04-26	TJN-0-1_Z3_20	low counts	-107.279	48.7293	13.7819	73.0503	0.877193	1824.64	0.000480748	0.000114314	1.3116e-06	0.00272826	44.5914	12.6675	0.499402	49.3259	1.54349	50.9266	0.0224259	12.6675	0.248741	4239.44	1454.31	142.969	35.7235	947.899	488.647
2019-04-26	TJN-0-1_Z3_21	low counts	276.428	64.6023	23.0693	84.4538	2.58621	4643.27	0.000556979	0.000145147	3.86697e-06	0.00694276	89.8371	6.65959	0.444864	21.5422	0.682461	22.5481	0.0111313	6.65959	0.29535	4068.13	641.496	71.3603	9.44526	528.261	170.574
2019-04-26	TJN-0-1_Z3_22	low counts	-140.216	76.3086	20.3519	61.7585	0.862069	5818.16	0.000148169	0.000133589	1.28899e-06	0.00869948	93.7752	7.89115	0.326236	24.3951	0.479457	25.6397	0.0106638	7.89115	0.307771	3599.49	748.814	68.3793	10.7259	397.701	156.102
2019-04-26	TJN-0-1_Z3_23	low counts	12.9246	84.8007	7.47475	49.9403	0.862069	7857.9	0.000109707	0.000119926	1.28899e-06	0.0117494	115.768	6.64592	0.0952817	42.7827	0.113429	43.2958	0.00863794	6.64592	0.1535	1533.65	1610.55	55.4446	7.33384	109.098	85.8385
2019-04-26	TJN-0-1_Z3_24	low counts	32.5261	72.0734	9.44598	65.1556	6.36364	5080.77	0.00125249	0.000123686	9.51509e-06	0.00759692	88.4125	7.19592	0.239414	29.0581	0.3732	29.9358	0.0113106	7.19592	0.240379	3116.08	925.199	72.5036	10.3678	322.022	153.077
2019-04-26	TJN-0-1_Z3_25		39.1537	150.255	109.777	206.725	6.03448	4213.3	0.00143225	0.0003936	9.02294e-06	0.00629985	37.559	10.5979	0.705993	9.5484	2.59055	14.2649	0.0266248	10.5979	0.742936	4742.97	274.249	169.389	35.3388	1297.97	190.056
2019-04-26	TJN-0-1_Z3_26	noisy signal	137.868	100.76	76.4442	212.668	7.27273	1842.47	0.00394728	0.000328766	1.08744e-05	0.00275491	23.6045	7.98348	1.06529	15.7023	6.21983	17.6153	0.0423649	7.98348	0.453213	5326.08	439.723	267.475	41.6986	2007.24	269.137
2019-04-26	TJN-0-1_Z3_27		-61.8661	71.7189	45.2754	163.041	4.31034	1635.13	0.00263608	0.000236144	6.44495e-06	0.0024449	29.0905	8.24634	0.743438	13.6461	3.52208	15.9442	0.0343755	8.24634	0.5172	4817.05	390.576	217.875	35.2365	1532.18	225.249
2019-04-26	TJN-0-1_Z3_28		92.8833	165.078	99.4303	226.077	3.57143	3149.33	0.00113403	0.000413694	5.3401e-06	0.00470897	23.7747	8.34364	0.826587	12.6125	4.79159	15.1226	0.0420615	8.34364	0.551735	4968.25	358.521	265.599	43.275	1783.42	226.762
2019-04-26	TJN-0-1_Z3_29		-33.7297	90.4572	50.603	189.717	0.862069	1633.73	0.000527668	0.000278933	1.28899e-06	0.00244281	21.9268	7.98533	0.549419	11.8141	3.45331	14.2597	0.0456064	7.98533	0.559993	4379.61	345.641	287.491	44.7497	1516.62	202.869
2019-04-26	TJN-0-1_Z3_30	low counts	133.89	72.9768	38.5338	149.648	5.17241	1628.51	0.00317617	0.000220226	7.73394e-06	0.00243499	26.6857	7.9916	0.417436	23.0513	2.15584	24.3973	0.0374732	7.9916	0.327561	3973.1	690.409	237.152	37.1087	1166.93	292.105
2019-04-26	TJN-0-1_Z3_31		278.804	5574.06	4516.27	11522.7	17847.7	19720.7	0.905027	0.0182255	0.0266864	0.0294869	4.2713	6.53309	0.803887	1.25063	25.9383	6.65172	0.234121	6.53309	0.982166	4928.64	35.613	1356.06	157.842	3344.21	122.385
2019-04-26	TJN-0-1_Z3_32		53.2864	121.614	86.5462	197.728	6.89655	3990.99	0.00172803	0.000342271	1.03119e-05	0.00596744	42.3561	5.31148	0.640585	7.96578	2.08433	9.57421	0.0236094	5.31148	0.55477	4602.87	230.365	150.427	15.7755	1143.66	123.56
2019-04-26	TJN-0-1_Z3_33		90.8372	146.282	90.2724	231.791	4.31034	3276.53	0.00131552	0.000394939	6.44495e-06	0.00489916	29.8604	5.19597	0.780952	10.4861	3.60441	11.7028	0.0334892	5.19597	0.443993	4887.39	299.161	212.349	21.6712	1550.51	170.831
2019-04-26	TJN-0-1_Z3_34		14.714	119.945	65.8923	179.031	8.03571	4470.08	0.00179767	0.000307681	1.20152e-05	0.00668379	46.5419	5.76878	0.621551	10.8865	1.84051	12.3205	0.021486	5.76878	0.468225	4559.2	315.525	137.041	15.6253	1060.04	150.407
2019-04-26	TJN-0-1_Z3_35		26.3275	145.697	96.5534	238.934	10.5263	4604.64	0.00228602	0.000405766	1.57393e-05	0.006885	40.4243	6.93737	0.628744	8.628	2.14357	11.0711	0.0247376	6.93737	0.626619	4575.87	249.855	157.528	21.5557	1162.98	142.782
2019-04-26	TJN-0-1_Z3_36		-79.6538	111.031	68.3273	193.577	0.862069	4754.27	0.000181325	0.000314483	1.28899e-06	0.00710873	54.0694	8.19627	0.630534	13.4401	1.60717	15.7421	0.0184948	8.19627	0.520659	4579.99	389.125	118.136	19.1606	973.008	180.107
2019-04-26	TJN-0-1_Z3_37	low counts	163.833	77.1464	35.3728	90.8494	4.31034	3766.69	0.00114433	0.000171494	6.44495e-06	0.00563206	60.1542	7.30384	0.428535	14.7988	0.981808	16.503	0.016624	7.30384	0.442577	4012.35	442.171	106.284	15.38	694.532	153.775
2019-04-26	TJN-0-1_Z3_38	low counts	63.0333	81.8642	41.5121	105.005	1.72414	4187.14	0.00041177	0.000192586	2.57798e-06	0.00626074	63.2014	7.21681	0.577936	15.6825	1.26026	17.2634	0.0158224	7.21681	0.418041	4453.48	457.017	101.2	14.4764	828.023	178.77
2019-04-26	TJN-0-1_Z3_39	low counts	-17.3625	108.848	41.0162	142.668	1.72414	6205.1	0.000277858	0.000246682	2.57798e-06	0.00927804	68.1532	5.63454	0.42068	12.9102	0.850691	14.0862	0.0146728	5.63454	0.400004	3984.69	386.398	93.8999	10.4964	625.028	123.646
2019-04-26	TJN-0-1_Z3_40	low counts	-110.318	94.4976	46.4708	168.398	0.862069	5378.11	0.000160292	0.000260878	1.28899e-06	0.00804151	69.6795	7.31082	0.557809	13.0272	1.10328	14.9384	0.0143514	7.31082	0.489398	4401.76	380.677	91.8577	13.3221	754.936	147.827
2019-04-26	TJN-0-1_Z3_41	low counts	-6.52208	73.4875	35.4209	105.898	3.44828	2237.36	0.00154122	0.000181139	5.15596e-06	0.00334537	37.007	8.72338	0.536741	15.1349	1.99888	17.4689	0.0270219	8.72338	0.499365	4345.43	443.617	171.883	29.524	1115.13	212.57
2019-04-26	TJN-0-1_Z3_42		90.2364	103.278	59.2734	146.97	3.44828	4811.92	0.000716611	0.000261008	5.15596e-06	0.00719492	57.1208	5.87234	0.732156	15.0956	1.76651	16.1975	0.0175067	5.87234	0.362545	4795.16	432.505	111.879	13.0134	1033.24	190.909
2019-04-26	TJN-0-1_Z3_43		-63.1078	105.931	58.7494	142.505	1.72414	3718.39	0.000463678	0.000259039	2.57798e-06	0.00555985	44.0343	5.74288	0.549665	8.90556	1.72034	10.5967	0.0227096	5.74288	0.54195	4380.26	260.537	144.758	16.4203	1016.15	127.709
2019-04-26	TJN-0-1_Z3_44	low counts	89.4305	83.7906	24.6526	95.1838	3.44828	5362.37	0.000643051	0.000171711	5.15596e-06	0.00801797	75.5425	6.91021	0.352217	20.6119	0.642576	21.7394	0.0132376	6.91021	0.317866	3716.61	627.629	84.775	11.6291	503.9	159.496
2019-04-26	TJN-0-1_Z3_45		-15.0712	87.2213	55.5027	175.682	1.72414	3674.87	0.00046917	0.000268501	2.57798e-06	0.00549477	52.1326	7.41821	0.697167	12.9893	1.84303	14.9583	0.0191818	7.41821	0.495925	4724.89	373.402	122.483	17.9755	1060.95	179.984
2019-04-26	TJN-0-1_Z3_46	low counts	89.3258	91.1165	44.5636	141.758	0.862069	2538.07	0.000339655	0.000233954	1.28899e-06	0.00379499	34.155	8.89195	0.631506	16.0687	2.54817	18.3649	0.0292783	8.89195	0.484182	4582.22	465.178	186.03	32.5283	1285.91	237.709
2019-04-26	TJN-0-1_Z3_47	low counts	-9.93404	104.801	66.4708	171.077	2.58621	4307.74	0.000600362	0.00028869	3.86697e-06	0.00644107	51.142	7.42933	0.849358	13.5492	2.28886	15.4524	0.0195534	7.42933	0.480789	5006.84	384.494	124.833	18.3439	1208.85	197.806
2019-04-26	TJN-0-1_Z3_48		98.7692	103.072	56.1775	144.361	1.72414	4760.32	0.000362189	0.000256024	2.57798e-06	0.00711778	55.9163	8.24955	0.54629	9.74073	1.34645	12.7647	0.0178839	8.24955	0.64628	4371.25	285.109	114.268	18.6601	866.025	138.811
2019-04-26	TJN-0-1_Z3_49		-131.315	127.102	75.3078	192.505	1.72414	5841.54	0.000295151	0.000333018	2.57798e-06	0.00873444	56.6131	7.34385	0.628115	9.57743	1.52907	12.0689	0.0176638	7.34385	0.608492	4574.42	277.369	112.874	16.4134	942.126	138.318
2019-04-26	TJN-0-1_Z3_50		185.39	121.797	77.7104	166.91	bdl	4048.44	bdl	0.000308987	bdl	0.00605335	40.0271	8.44841	0.571027	7.90059	1.96611	11.567	0.0249831	8.44841	0.730391	4435.95	230.45	159.072	26.4948	1103.98	144.861
												0.00559596
2019-04-26	TJN-0-1_Z2_01		7.26949	1968.52	299.152	412.667	5.26316	212309	2.47901e-05	0.00226024	7.86963e-06	0.317451	130.692	1.50655	0.148281	6.25227	0.156366	6.43122	0.00765157	1.50655	0.234256	2326.2	214.266	49.1374	1.47476	147.517	17.5085
2019-04-26	TJN-0-1_Z2_02		152.843	1210.31	247.321	585.676	7.01754	111620	6.28697e-05	0.00172305	1.04928e-05	0.166898	112.74	1.96613	0.202007	3.30546	0.246941	3.846	0.00886996	1.96613	0.511213	2842.48	107.739	56.9274	2.22829	224.088	15.3507
2019-04-26	TJN-0-1_Z2_03		179.715	647.078	227.54	514.607	2.58621	46928.9	5.51091e-05	0.00117148	3.86697e-06	0.0701694	88.6088	1.8275	0.362135	3.75996	0.563248	4.18055	0.0112856	1.8275	0.437143	3758.84	114.168	72.3439	2.62885	453.639	30.1373
2019-04-26	TJN-0-1_Z2_04		-6.44675	839.63	224.426	438.629	5.45455	70127.8	7.778e-05	0.00126716	8.1558e-06	0.104857	102.917	2.23511	0.265354	5.01074	0.35534	5.48664	0.00971656	2.23511	0.407374	3278.78	157.484	62.3346	2.77247	308.73	28.7998
2019-04-26	TJN-0-1_Z2_05		-105.519	613.498	206.736	441.033	6.03448	46635.6	0.000129397	0.00106358	9.02294e-06	0.0697309	93.1934	2.81181	0.326586	4.76117	0.482968	5.52947	0.0107304	2.81181	0.508513	3601.13	146.128	68.804	3.84754	400.107	35.9272
2019-04-26	TJN-0-1_Z2_06		105.497	1165.67	303.19	638.354	7.01754	98556.6	7.12032e-05	0.00177694	1.04928e-05	0.147365	106.758	2.27295	0.254388	5.77209	0.328399	6.20349	0.00936699	2.27295	0.366398	3212.28	182.362	60.1025	2.71892	288.343	30.6756
2019-04-26	TJN-0-1_Z2_07		79.3932	2217.54	677.58	1399.96	742.593	177378	0.00418649	0.00362189	0.00111035	0.265221	105.539	2.54707	0.283859	4.26758	0.370676	4.96989	0.00947513	2.54707	0.5125	3384.29	133.051	60.7931	3.08159	320.154	26.9336
2019-04-26	TJN-0-1_Z2_08		84.2044	756.801	274.822	588.291	8.62069	57927.4	0.000148819	0.00136602	1.28899e-05	0.0866148	92.7375	1.99038	0.370271	4.13631	0.550263	4.59028	0.0107831	1.99038	0.433607	3792.53	125.317	69.1404	2.73702	445.169	32.5598
2019-04-26	TJN-0-1_Z2_09		-153.891	2070.34	361.962	734.783	12.931	217301	5.95074e-05	0.00267069	1.93349e-05	0.324915	126.452	1.35318	0.165378	2.70831	0.180243	3.02755	0.00790815	1.35318	0.446957	2511.4	91.0742	50.7787	1.36871	168.27	9.34625
2019-04-26	TJN-0-1_Z2_10		50.3591	1460.19	275.185	411.146	5.17241	144672	3.57527e-05	0.00181009	7.73394e-06	0.216318	122.435	2.05078	0.184683	6.99807	0.207887	7.29237	0.00816763	2.05078	0.281223	2695.38	231.189	52.4381	2.1417	191.778	25.173
2019-04-26	TJN-0-1_Z2_11		-44.5055	1598.61	371.227	800.854	9.43396	146753	6.42848e-05	0.00233642	1.41059e-05	0.219429	110.655	1.85952	0.225411	4.21949	0.280744	4.61106	0.00903712	1.85952	0.403273	3019.75	135.428	57.9953	2.14684	251.248	20.3215
2019-04-26	TJN-0-1_Z2_12		-4.15436	1286.51	277.715	663.874	10	110937	9.01413e-05	0.00187887	1.49523e-05	0.165876	110.415	2.46302	0.230296	5.14098	0.287451	5.70054	0.00905673	2.46302	0.432068	3054.11	164.528	58.1206	2.84955	256.551	25.5234
2019-04-26	TJN-0-1_Z2_13		-67.792	2026.87	300.668	510.254	7.75862	210390	3.68774e-05	0.00239301	1.16009e-05	0.314581	123.747	1.90308	0.150855	6.83521	0.168008	7.0952	0.008081	1.90308	0.268221	2355.64	233.523	51.8841	1.96657	157.689	20.517
2019-04-26	TJN-0-1_Z2_14		-42.5344	1082.26	212.81	296.82	1.72414	110038	1.56686e-05	0.00134238	2.57798e-06	0.164532	125.746	2.21682	0.181641	8.31173	0.199079	8.60228	0.00795251	2.21682	0.257701	2667.91	275.298	51.0624	2.25458	184.346	28.597
2019-04-26	TJN-0-1_Z2_15		59.5729	1169.93	164.904	297.528	8.62069	121993	7.06653e-05	0.00137651	1.28899e-05	0.182408	124.967	1.84083	0.148871	6.22293	0.16418	6.48949	0.00800212	1.84083	0.283663	2332.99	213.108	51.3797	1.88383	154.355	18.4173
2019-04-26	TJN-0-1_Z2_16		-8.13066	1648.11	282.127	518.419	5.17241	166623	3.10427e-05	0.00206487	7.73394e-06	0.249139	122.799	1.994	0.172911	8.03867	0.194059	8.28229	0.0081434	1.994	0.240754	2586.02	268.35	52.2832	2.07628	180.087	26.9735
2019-04-26	TJN-0-1_Z2_17		180.933	1431.76	400.911	899.068	13.6364	113124	0.000120543	0.00230358	2.03895e-05	0.169147	97.7626	2.77947	0.286938	4.45902	0.404502	5.25436	0.0102289	2.77947	0.528983	3401.09	138.845	65.6045	3.6274	344.908	30.2752
2019-04-26	TJN-0-1_Z2_18		200.343	1861.91	396.771	777.09	9.82143	178720	5.49544e-05	0.00255996	1.46853e-05	0.267227	115.121	1.9182	0.209889	4.63836	0.25127	5.01935	0.00868651	1.9182	0.382161	2904.69	150.353	55.755	2.12942	227.608	20.2655
2019-04-26	TJN-0-1_Z2_19		213.894	2028.96	272.871	453.533	3.57143	217038	1.64553e-05	0.0023235	5.3401e-06	0.324521	129.058	1.58921	0.134976	3.67726	0.144138	4.00598	0.00774848	1.58921	0.39671	2163.7	128.247	49.7574	1.57522	136.723	10.1973
2019-04-26	TJN-0-1_Z2_20		-14.8172	939.28	149.51	281.079	2.67857	93730.4	2.85774e-05	0.00115516	4.00508e-06	0.140149	121.461	2.15285	0.161029	5.40748	0.182714	5.82027	0.00823306	2.15285	0.369888	2466.49	182.659	52.8564	2.26613	170.393	18.0975
2019-04-26	TJN-0-1_Z2_21		201.444	509.35	167.87	335.709	5.17241	37762.2	0.000136974	0.000854167	7.73394e-06	0.0564631	92.6045	3.52931	0.370417	7.76179	0.55127	8.52652	0.0107986	3.52931	0.413922	3793.12	235.149	69.2391	4.85935	445.828	59.7407
2019-04-26	TJN-0-1_Z2_22		-88.1166	2297.4	377.168	612.461	4.46429	230686	1.93523e-05	0.00277184	6.67513e-06	0.344928	128.363	2.47512	0.154667	9.78714	0.16606	10.0953	0.00779042	2.47512	0.245176	2398.17	332.906	50.0257	2.46633	155.993	28.7839
2019-04-26	TJN-0-1_Z2_23		141.396	1625.59	181.561	370.497	1.72414	171255	1.00676e-05	0.00183633	2.57798e-06	0.256066	130.645	1.7716	0.112432	4.64823	0.118605	4.9744	0.00765432	1.7716	0.356144	1839.1	168.326	49.1551	1.73481	113.807	10.6548
2019-04-26	TJN-0-1_Z2_24		17.2101	1145.49	174.854	332.005	1.72414	120785	1.42745e-05	0.00139337	2.57798e-06	0.180601	124.914	1.95352	0.153629	6.11504	0.1695	6.4195	0.00800553	1.95352	0.30431	2386.72	208.246	51.4015	1.99998	158.985	18.7206
2019-04-26	TJN-0-1_Z2_25		174.061	2837.19	444.821	794.604	2.63158	285043	9.23222e-06	0.00343767	3.93481e-06	0.426204	126.184	1.54962	0.155003	3.22663	0.169294	3.57946	0.00792495	1.54962	0.432921	2401.87	109.711	50.8862	1.57069	158.806	10.4702
2019-04-26	TJN-0-1_Z2_26		237.605	2349.38	324.131	405.153	4.31034	261946	1.64551e-05	0.00259613	6.44495e-06	0.391669	133.063	1.69763	0.13206	6.33213	0.136779	6.55575	0.00751524	1.69763	0.258952	2125.53	221.775	48.2652	1.6324	130.171	15.8936
2019-04-26	TJN-0-1_Z2_27		15.593	1619.61	309.779	532.931	7.69231	176678	4.35386e-05	0.00207639	1.15018e-05	0.264174	130.379	2.01511	0.167184	10.0257	0.176723	10.2262	0.00766993	2.01511	0.197053	2529.65	336.533	49.2549	1.97721	165.237	30.719
2019-04-26	TJN-0-1_Z2_28		-39.8742	1782.46	197.295	337.461	5.35714	191329	2.79997e-05	0.00195403	8.01016e-06	0.28608	133.409	1.8276	0.106792	4.25148	0.110321	4.62766	0.00749574	1.8276	0.394931	1745.37	155.746	48.1404	1.75284	106.259	9.29483
2019-04-26	TJN-0-1_Z2_29		-181.791	937.434	250.391	290.923	8.18182	97163.7	8.42065e-05	0.00124698	1.22337e-05	0.145282	123.325	2.16747	0.270887	15.672	0.30272	15.8212	0.00810862	2.16747	0.136998	3311.17	491.329	52.0608	2.24732	268.522	72.0427
2019-04-26	TJN-0-1_Z2_30		102.643	849.597	148.163	301.146	3.44828	79430.9	4.34123e-05	0.00109532	5.15596e-06	0.118767	112.317	3.49075	0.171703	8.54233	0.210687	9.22804	0.00890336	3.49075	0.378277	2574.31	285.488	57.1407	3.97043	194.129	32.0991
												0.199363
2019-04-26	TJN-0-1_Z1_01		79.1898	1813.88	812.189	1887.41	2579.63	112464	0.0229374	0.00380607	0.00385714	0.168159	71.9768	1.80971	0.436655	1.76721	0.836087	2.52945	0.0138934	1.80971	0.715459	4040.37	52.7128	88.9459	3.19643	616.984	23.1254
2019-04-26	TJN-0-1_Z1_02		216.442	1622.66	565.778	1317.19	1538.18	128936	0.0119298	0.00295617	0.00229993	0.192789	94.9542	1.53274	0.333461	1.70458	0.48399	2.29235	0.0105314	1.53274	0.668631	3633.06	52.2005	67.5347	2.05912	400.807	15.0702
2019-04-26	TJN-0-1_Z1_03		-111.953	2176.38	1018.24	2584.78	2773.15	118030	0.0234953	0.00487357	0.00414649	0.176482	66.9593	1.41006	0.477182	1.49597	0.982153	2.05577	0.0149345	1.41006	0.685904	4172.22	44.2762	95.5619	2.67453	694.709	20.4781
2019-04-26	TJN-0-1_Z1_04		99.4655	933.923	288.904	725.349	395.283	75118.2	0.00526215	0.00164283	0.000591039	0.112319	95.3539	3.10131	0.312812	5.6942	0.452117	6.48398	0.0104873	3.10131	0.478303	3534.85	175.584	67.2531	4.14844	378.761	40.1909
2019-04-26	TJN-0-1_Z1_05		60.9455	593.771	174.324	484.783	222.727	47346	0.00470425	0.00105651	0.000333028	0.0707931	95.1721	2.56268	0.30818	5.5052	0.446274	6.07244	0.0105073	2.56268	0.422019	3511.83	170.036	67.3809	3.43462	374.667	37.356
2019-04-26	TJN-0-1_Z1_06		35.0992	393.199	133.467	298.934	83.0189	31138.7	0.0026661	0.0006962	0.000124132	0.0465595	95.4817	3.01806	0.351777	6.4558	0.507753	7.12643	0.0104732	3.01806	0.423502	3714.71	196.603	67.1635	4.03176	416.937	47.603
2019-04-26	TJN-0-1_Z1_07		-31.6819	819.24	221.665	540.237	60.5769	63715.2	0.000950746	0.00133332	9.05764e-05	0.0952688	95.4707	2.58259	0.291757	5.19918	0.421169	5.80528	0.0104744	2.58259	0.444869	3427	161.581	67.1713	3.45057	356.887	34.35
2019-04-26	TJN-0-1_Z1_08		123.294	478.881	218.315	475.167	214.912	28802	0.00746171	0.000988614	0.000321343	0.0430656	59.9808	5.20594	0.476708	6.03304	1.09533	7.96865	0.016672	5.20594	0.653303	4170.75	178.575	106.589	10.9972	751.091	81.2541
2019-04-26	TJN-0-1_Z1_09		127.054	1493.25	866.988	1983	221.429	65108.1	0.00340094	0.0036625	0.000331087	0.0973515	53.5189	4.08313	0.525643	4.02118	1.3536	5.73078	0.018685	4.08313	0.712492	4314.78	118.062	119.34	9.64871	869.113	64.8179
2019-04-26	TJN-0-1_Z1_10		-70.1938	459.121	206.094	497.746	305.454	24469.5	0.0124831	0.000980684	0.000456724	0.0365875	64.0229	2.47012	0.474623	4.45447	1.02169	5.0935	0.0156194	2.47012	0.484955	4164.26	131.9	99.9109	4.89592	714.763	50.9723
2019-04-26	TJN-0-1_Z1_11		226.764	1095.92	272.094	644.783	791.964	92081.4	0.0086007	0.00169733	0.00118417	0.137683	100.139	1.83659	0.253852	4.02796	0.349367	4.42691	0.00998609	1.83659	0.41487	3208.95	127.292	64.0552	2.34079	304.245	23.0134
2019-04-26	TJN-0-1_Z1_12		29.5716	1063.31	237.725	530.237	482.727	99356.4	0.00485854	0.00154425	0.000721788	0.148561	111.259	1.89174	0.237981	3.95289	0.294791	4.38223	0.00898807	1.89174	0.431683	3106.52	125.957	57.682	2.17228	262.324	20.0619
2019-04-26	TJN-0-1_Z1_13		255.359	653.565	371.534	894.783	553.636	26978.2	0.0205217	0.00161897	0.000827813	0.0403385	56.6145	4.37944	0.500391	4.87334	1.21812	6.55202	0.0176633	4.37944	0.668411	4242.36	143.66	112.871	9.79276	808.913	70.5605
2019-04-26	TJN-0-1_Z1_14		-109.204	369.933	87.7031	170.894	154.464	33212.8	0.00465074	0.000530017	0.00023096	0.0496608	107.188	3.87447	0.245297	7.0713	0.315392	8.06318	0.00932938	3.87447	0.480514	3154.66	224.442	59.8622	4.61557	278.352	38.521
2019-04-26	TJN-0-1_Z1_15		15.1804	1624.6	438.254	939.247	1196.49	141905	0.00843166	0.00253156	0.00178903	0.21218	102.563	2.21005	0.270127	2.56551	0.362982	3.38617	0.00975013	2.21005	0.65267	3306.76	80.4578	62.549	2.75077	314.439	18.15
2019-04-26	TJN-0-1_Z1_16		213.664	2145.89	1316.99	3115.14	3563.16	77459.6	0.0460002	0.00554701	0.00532774	0.11582	42.7651	2.40343	0.598503	2.4265	1.92878	3.41531	0.0233836	2.40343	0.703722	4504.37	70.5251	149.005	7.07642	1091.12	44.6783
2019-04-26	TJN-0-1_Z1_17		60.5342	1604.19	691.826	1632.06	1772.73	102206	0.0173447	0.0033124	0.00265063	0.152821	77.55	1.882	0.429856	2.52003	0.76392	3.14523	0.0128949	1.882	0.598366	4016.95	75.2747	82.5946	3.08828	576.269	27.2917
2019-04-26	TJN-0-1_Z1_18		227.666	2286.7	1435.16	3478.42	4463.16	87790.4	0.0508388	0.00607174	0.00667344	0.131267	43.876	1.7078	0.588949	1.93413	1.84994	2.5802	0.0227915	1.7078	0.661885	4480.97	56.283	145.274	4.90462	1063.41	33.455
2019-04-26	TJN-0-1_Z1_19		48.5044	1143.64	549.234	1271.15	1568.97	60007.7	0.0261461	0.00249946	0.00234596	0.0897252	67.4177	3.55741	0.418582	5.09053	0.855683	6.21037	0.0148329	3.55741	0.572818	3977.21	152.428	94.9168	6.70021	627.763	56.5505
2019-04-26	TJN-0-1_Z1_20		73.3207	797.609	192.54	324.597	176.364	76277.8	0.00231212	0.00110868	0.000263704	0.114053	113.248	3.52821	0.196351	6.64886	0.238951	7.52699	0.00883016	3.52821	0.468741	2796.11	217.621	56.673	3.98032	217.561	29.0607
2019-04-26	TJN-0-1_Z1_21		24.3963	2326.58	1407.75	3511.1	3211.4	88564.4	0.0362607	0.00610981	0.00480179	0.132424	43.298	3.62683	0.610219	2.15002	1.94233	4.21622	0.0230957	3.62683	0.86021	4532.52	62.399	147.191	10.5472	1095.8	55.0046
2019-04-26	TJN-0-1_Z1_22		333.944	3307.75	2526.26	6216.93	8356.03	62277.7	0.134174	0.0101621	0.0124942	0.0931195	20.8507	5.01279	0.749675	2.04897	4.95516	5.41538	0.0479599	5.01279	0.925658	4829	58.6127	301.985	29.5099	1811.7	87.6155
2019-04-26	TJN-0-1_Z1_23		25.8212	716.801	316.336	704.783	409.821	45554.7	0.00899626	0.00146553	0.000612777	0.0681146	76.3534	2.91492	0.405905	3.81608	0.732659	4.802	0.013097	2.91492	0.607021	3931.1	114.594	83.8806	4.85659	558.112	40.4202
2019-04-26	TJN-0-1_Z1_24		-1.7044	455.55	193.954	466.925	538.596	26489.7	0.0203323	0.000941446	0.000805325	0.0396081	68.4116	4.42062	0.422541	4.8702	0.851226	6.57728	0.0146174	4.42062	0.672104	3991.29	145.704	93.5478	8.20583	625.322	59.6317
												0.104835
2015-09-09	NIST614_01		9204.16	164880	143649	348795	112576	231263	4.78199	0.463044	3.234	0.676288	1.41422	1.31811	0.87123	0.42448	84.9026	1.38477	0.707103	1.31811	0.95186	5042.89	6.01343	3447.53	70.0102	4521.72	27.4205
2015-09-09	NIST614_02		9149.15	171253	149873	367290	105927	236829	4.3938	0.480942	3.04299	0.692565	1.39676	1.31449	0.871634	0.462149	86.004	1.39337	0.715943	1.31449	0.943393	5043.55	6.54687	3480.82	70.3252	4534.65	27.5925
2015-09-09	NIST614_03		8274.11	149273	130307	315142	108396	215781	4.93481	0.419214	3.11394	0.631015	1.43412	1.31306	0.868824	0.423276	83.4933	1.3796	0.697291	1.31306	0.95177	5038.97	5.99738	3410.37	69.1764	4504.92	27.3141
2015-09-09	NIST614_04		8105.62	142163	124576	302984	97195.4	203260	4.69747	0.399246	2.79217	0.594398	1.44505	1.29603	0.871622	0.455185	83.1289	1.37364	0.692019	1.29603	0.943501	5043.53	6.44822	3390.31	67.9806	4500.53	27.1964
2015-09-09	NIST614_05		9350.86	163678	142545	349121	91235.7	237238	3.7779	0.459668	2.62096	0.693761	1.45271	1.34588	0.872212	0.509044	82.7463	1.43893	0.688368	1.34588	0.935334	5044.49	7.2109	3376.39	70.3614	4495.91	28.4694
2015-09-09	NIST614_06		9618.85	172788	149621	366550	88594.1	252741	3.44349	0.485252	2.54508	0.739097	1.48517	1.34014	0.87278	0.487292	80.9908	1.42599	0.673325	1.34014	0.939801	5045.41	6.9025	3318.7	69.1533	4474.39	28.2098
2015-09-09	NIST614_07		9490.01	170465	148683	361160	95117	251319	3.71795	0.47873	2.73246	0.734939	1.46022	1.37008	0.86965	0.453116	82.0789	1.44306	0.684827	1.37008	0.949424	5040.32	6.41981	3362.86	71.4021	4487.78	28.5473
2015-09-09	NIST614_08		9010.67	161844	141359	347604	94755.9	241861	3.84866	0.454517	2.72209	0.707282	1.48744	1.38078	0.870254	0.443401	80.633	1.45023	0.672297	1.38078	0.952113	5041.3	6.28189	3314.73	71.1739	4469.95	28.681
2015-09-09	WC1_01		118.321	60166.9	5013.29	4581	46.2678	1460238	0.000311261	0.168971	0.00132915	4.27021	23.9263	1.43771	0.0834492	1.49544	0.480677	2.07445	0.0417951	1.43771	0.693056	1279.74	29.1453	263.95	7.4321	398.537	13.5846
2015-09-09	WC1_02		285.448	60111.9	4800.86	4368.76	134.015	1429703	0.000920826	0.168817	0.0038499	4.18092	23.6513	1.32976	0.0798065	1.58071	0.465039	2.06564	0.042281	1.32976	0.643749	1192.21	31.1966	266.956	6.95098	387.756	13.2289
2015-09-09	WC1_03		132.529	63340.4	4702.17	3628.47	147.459	1518265	0.000954097	0.177883	0.0042361	4.4399	23.9903	1.35496	0.0737513	2.34359	0.423681	2.70709	0.0416835	1.35496	0.500522	1034.67	47.3447	263.259	6.98661	358.68	16.2298
2015-09-09	WC1_04		44.161	67065.1	4031.49	1313.61	135.554	1688786	0.00078851	0.188344	0.00389411	4.93856	25.0406	1.31703	0.0597137	0.883618	0.328651	1.58599	0.0399352	1.31703	0.830418	593.215	19.1529	252.431	6.51741	288.536	7.93571
2015-09-09	WC1_05		105.36	79390.7	6261.05	5553.49	185.007	1896845	0.000958134	0.222959	0.00531477	5.547	24.3152	1.28998	0.0783228	0.988656	0.443931	1.62526	0.0411265	1.28998	0.793703	1155.07	19.6179	259.812	6.56639	373.021	10.097
2015-09-09	WC1_06		-16.5748	66846.1	4190.39	1816.17	68.6593	1663993	0.000405338	0.187729	0.0019724	4.86606	24.8809	1.24577	0.0619454	1.15596	0.343122	1.69947	0.0401915	1.24577	0.733036	672.226	24.7287	254.02	6.20294	299.535	8.77864
2015-09-09	WC1_07		101.037	79433.8	6266.58	5938.12	279.375	1842629	0.00148943	0.22308	0.00802571	5.38845	23.0933	1.45827	0.0772813	1.05898	0.461204	1.80222	0.0433025	1.45827	0.809152	1128.46	21.0958	273.271	7.79877	385.095	11.4866
2015-09-09	WC1_08		50.1357	122873	8474.73	4804.73	819.861	2889605	0.00278722	0.345074	0.0235525	8.45015	23.5045	1.3305	0.0674739	1.99615	0.395631	2.39893	0.042545	1.3305	0.554624	852.435	41.4778	268.589	6.99652	338.474	13.717
2015-09-09	WC1_09		172.31	78838.7	5659.76	4503.57	444.901	1872906	0.00233355	0.221408	0.0127809	5.47699	24.2475	1.50467	0.0802853	3.87914	0.456326	4.16074	0.0412414	1.50467	0.361636	1204	76.4274	260.523	7.67917	381.7	26.1364
2015-09-09	WC1_10		231.369	71527.9	5704.86	5079.21	511.569	1723689	0.00291552	0.200877	0.0146961	5.04063	24.0911	1.34482	0.0803925	0.987893	0.459901	1.66867	0.0415091	1.34482	0.805921	1206.63	19.4562	262.18	6.90653	384.189	10.6194
2015-09-09	WC1_11		124.058	60008.7	4143.44	2870.38	94.811	1420820	0.000655526	0.168527	0.00272367	4.15494	23.572	1.79546	0.0681481	2.55371	0.398441	3.12172	0.0424233	1.79546	0.575153	873.063	52.8909	267.836	9.41386	340.517	17.9035
2015-09-09	WC1_12		191.409	76731.3	4434.17	1050.05	281.398	1840498	0.00150195	0.21549	0.00808382	5.38222	24.2325	1.43142	0.0566077	0.9199	0.321947	1.70152	0.041267	1.43142	0.841259	476.284	20.3399	260.681	7.30987	283.399	8.38059
2015-09-09	WC1_13		62.1849	56428.9	4002.45	2824.52	88.7735	1251869	0.000696618	0.158473	0.00255023	3.66088	22.6182	1.57669	0.070777	1.49594	0.431261	2.17342	0.0442122	1.57669	0.725439	950.981	30.6092	278.889	8.60116	364.072	13.2129
2015-09-09	WC1_14		118.806	89479.2	5878.38	2953.94	431.866	2199797	0.00192857	0.251291	0.0124064	6.43293	24.9879	1.30934	0.0651943	0.835021	0.359572	1.55294	0.0400193	1.30934	0.843135	780.613	17.5506	252.953	6.49248	311.895	8.30656
2015-09-09	WC1_15		49.2018	64587.4	4531.55	2992.5	202.102	1628342	0.00121925	0.181385	0.00580585	4.7618	25.2332	1.3471	0.070265	0.980309	0.383772	1.66604	0.0396304	1.3471	0.808566	936.107	20.1048	250.542	6.61722	329.81	9.34019
2015-09-09	WC1_16		160.115	42619.9	3126.1	2349.6	27.1009	1028732	0.000258792	0.119693	0.000778537	3.00835	24.398	1.32579	0.0720622	1.94658	0.407061	2.35518	0.040987	1.32579	0.562926	987.698	39.6061	258.948	6.72664	346.757	13.7432
2015-09-09	NR1511_1_01		1050.13	24871.3	15182.9	40715.1	349.901	11364.8	0.302451	0.069848	0.0100517	0.0332343	0.449088	6.84825	0.666367	0.7281	204.497	6.88685	2.22673	6.84825	0.994396	4659.84	10.4984	7551.78	582.202	5407.35	130.428
2015-09-09	NR1511_1_02		2178.26	45621.4	32796.8	80987.5	388.895	20292.3	0.188266	0.128122	0.0111719	0.0593414	0.410661	6.60361	0.673551	0.747063	226.044	6.64574	2.4351	6.60361	0.993662	4675.3	10.7637	7955.17	576.937	5508.6	126.189
2015-09-09	NR1511_1_03		23.2656	1045.74	254.552	531.881	426.033	15297.2	0.273591	0.00293683	0.0122388	0.0447339	14.9004	2.32832	0.253634	3.60042	2.34592	4.28766	0.0671121	2.32832	0.543027	3207.59	56.8965	418.733	18.8515	1226.32	59.2841
2015-09-09	NR1511_1_04		71.1556	790.109	296.768	626.975	123.039	9522.45	0.12693	0.00221892	0.0035346	0.0278468	12.1418	3.84792	0.373831	4.09373	4.24325	5.61829	0.0823601	3.84792	0.684893	3807.02	61.9549	510.195	37.6402	1682.43	88.3742
2015-09-09	NR1511_1_05		96.6635	1104.49	299.37	678.226	221.269	15521.3	0.140043	0.00310183	0.00635647	0.0453893	14.1975	2.763	0.269087	3.70806	2.61208	4.62427	0.070435	2.763	0.597499	3300.71	58.172	438.776	23.3974	1304.04	65.7352
2015-09-09	NR1511_1_06		-19.8322	923.04	323.553	803.841	34.0145	10399.1	0.032132	0.00259224	0.000977149	0.0304105	11.46	4.69902	0.353009	4.17345	4.2453	6.28478	0.0872603	4.69902	0.747682	3720.03	63.5259	539.314	48.4402	1682.83	98.3739
2015-09-09	NR1511_1_07		168.645	3036.67	1754.48	4271.19	18.8868	10827.1	0.0171362	0.00852811	0.000542567	0.0316621	3.63673	2.49444	0.587787	1.86019	22.2748	3.11168	0.274972	2.49444	0.801638	4478.09	27.0698	1565.99	68.9896	3195.79	58.7435
2015-09-09	NR1511_1_08		68.4786	1874.53	1299.72	3152.19	bdl	5348.42	bdl	0.00526438	-3.88208e-05	0.0156405	2.87234	3.04498	0.670231	2.13999	32.1584	3.72175	0.348148	3.04498	0.818156	4668.18	30.8438	1925.75	100.592	3555.16	70.7757
2015-09-09	NR1511_1_09		255.86	3484.19	2227.48	5525.03	41.5059	8188.52	0.0497937	0.00978489	0.00119235	0.0239459	2.32693	2.55679	0.629319	1.42243	37.2729	2.92583	0.429751	2.55679	0.873869	4577.19	20.5944	2304.59	98.3294	3700.81	56.2757
2015-09-09	NR1511_1_10		265.5	2112.74	1206.06	3048.17	11.7439	14570.5	0.00791787	0.00593335	0.000337372	0.0426089	6.86109	5.97124	0.53509	3.69553	10.7483	7.0223	0.145749	5.97124	0.850326	4340.91	54.1729	877.092	97.1968	2501.61	122.741
2015-09-09	NR1511_1_11		27.0883	1291.95	332.053	723.349	26.0296	20600.5	0.0124125	0.00362829	0.000747763	0.0602425	16.52	2.41171	0.25849	3.80715	2.15645	4.50674	0.0605327	2.41171	0.535134	3237.53	60.0212	378.864	17.7232	1167.13	60.6768
2015-09-09	NR1511_1_12		235.036	1675.51	373.03	747.279	bdl	28392.7	bdl	0.00470546	-3.88208e-05	0.0830296	17.0057	2.50994	0.212146	5.46905	1.71928	6.0175	0.0588038	2.50994	0.417107	2922.01	88.5059	368.347	17.9472	1015.75	74.464
2015-09-09	NR1511_1_13		39.8732	1674.07	247.012	434.471	bdl	31588.9	bdl	0.00470141	-3.88208e-05	0.0923763	18.8582	2.5207	0.149719	3.53527	1.09417	4.3419	0.0530273	2.5207	0.580552	2342.72	60.4723	333.081	16.3447	750.526	45.0547
2015-09-09	NR1511_1_14		-0.244026	1584.65	380.308	788.944	bdl	25703.2	bdl	0.00445029	-3.88208e-05	0.0751645	16.0785	3.1725	0.230454	4.51408	1.97535	5.5174	0.0621948	3.1725	0.575	3055.2	72.2261	388.959	23.9053	1107.13	71.7889
2015-09-09	NR1511_1_15		71.8512	1433.58	153.48	209.926	bdl	27201.2	bdl	0.00402603	-3.88208e-05	0.0795452	19.2275	1.90776	0.10829	3.05399	0.776195	3.60089	0.0520089	1.90776	0.529803	1770.84	55.7621	326.843	12.1485	583.311	31.4632
2015-09-09	NR1511_1_16		40.2087	4623.15	2246.5	5306.91	15.7218	19812.5	0.00779532	0.0129835	0.000451647	0.0579383	4.18087	6.26069	0.486025	1.89734	16.0213	6.54188	0.239185	6.26069	0.957018	4199.37	28.034	1382.46	153.947	2878.07	117.925
2015-09-09	NR1511_1_17		-252.615	1853.26	268.299	441.762	26	32524.9	0.00785285	0.00520464	0.000746913	0.0951136	17.4607	2.39768	0.142897	3.5823	1.12789	4.31066	0.0572716	2.39768	0.556222	2262.61	61.7988	359.011	16.7236	766.749	45.3715
2015-09-09	NR1511_1_18		88.3351	746.071	200.982	391.761	14.75	11095	0.0130598	0.00209525	0.000423729	0.0324453	14.7154	3.48198	0.264767	4.24876	2.47968	5.49328	0.0679558	3.48198	0.633862	3275.29	66.7857	423.828	28.5028	1266.12	76.538
2015-09-09	NR1511_1_19		-24.3849	1988.38	861.155	2204.93	20.4512	11612.8	0.0173002	0.00558412	0.00058751	0.0339597	5.96882	2.34602	0.440519	1.8488	10.1714	2.98695	0.167537	2.34602	0.785423	4053.5	27.5514	998.529	43.2576	2450.49	53.7786
2015-09-09	NR1511_1_20		118.405	1145.01	370.151	792.483	47.3096	15158.6	0.0306591	0.00321561	0.00135908	0.0443288	13.1237	2.90191	0.317441	3.20206	3.33359	4.32137	0.0761978	2.90191	0.671525	3557.48	49.2894	473.388	26.4357	1488.95	65.3572
2015-09-09	NR1511_1_21		73.6669	1162.63	395.548	869.793	34.75	13057.7	0.0261431	0.0032651	0.000998278	0.0381851	10.4026	4.67986	0.323736	4.388	4.28898	6.41526	0.0961296	4.67986	0.729488	3587.67	67.401	591.687	52.6987	1691.25	100.504
2015-09-09	NR1511_1_22		119.985	4815.47	2693.29	6325.61	27.9872	9845.14	0.0279259	0.0135236	0.000803999	0.0287904	2.03032	2.42663	0.544767	1.25446	36.9788	2.73171	0.492534	2.42663	0.888321	4367.17	18.363	2581.63	102.426	3692.98	52.6263
2015-09-09	NR1511_1_23		-82.2295	592.555	163.482	422.714	33.1154	8417.15	0.0386487	0.00166411	0.000951319	0.0246145	13.6387	3.59532	0.268682	3.84374	2.71501	5.26314	0.0733206	3.59532	0.683113	3298.35	60.3116	456.13	31.5877	1332.57	75.253
2015-09-09	NR1511_1_24		-85.2037	853.812	274.641	586.016	78.2621	11070.3	0.0694485	0.00239782	0.00224826	0.0323731	12.9863	3.50856	0.316288	4.46183	3.35664	5.67608	0.0770045	3.50856	0.61813	3551.88	68.7084	478.218	32.2618	1494.34	85.1387
2015-09-09	NR1511_1_25		160.396	9446.71	3974.33	9690.6	281.428	16444.2	0.168122	0.0265299	0.00808469	0.0480882	1.79433	7.46318	0.40581	2.12258	31.1692	7.75915	0.557311	7.46318	0.961855	3930.74	31.8704	2855.51	335.464	3524.41	142.229
2015-09-09	NR1511_1_26		358.919	14437.5	7044.76	17177.5	568.017	39845.5	0.14004	0.0405458	0.0163177	0.116521	2.69188	4.07533	0.481742	1.29702	24.664	4.27675	0.371487	4.07533	0.952904	4186.29	19.1784	2036.39	140.771	3295.01	80.2131
2015-09-09	NR1511_1_27		53.6205	3368.26	1261.01	2920.29	69.7501	32444.8	0.0211188	0.00945933	0.00200374	0.0948793	9.65336	2.26297	0.376726	3.02463	5.37839	3.77749	0.103591	2.26297	0.599066	3818.69	45.7404	635.419	27.3287	1881.42	62.7083
2015-09-09	NR1511_1_28		-6.35476	1788.97	370.627	609.979	37.2501	30900.1	0.0118423	0.00502409	0.0010701	0.0903621	17.2341	1.99402	0.207496	2.20135	1.65931	2.9702	0.0580245	1.99402	0.671342	2886.09	35.737	363.6	14.0838	993.111	36.9552
2015-09-09	NR1511_1_29		138.97	6466.36	3599.06	8664.86	35.0854	22411.4	0.015379	0.0181599	0.00100791	0.0655384	3.43902	2.12022	0.554953	1.4585	22.2397	2.57343	0.290781	2.12022	0.823887	4394.26	21.3186	1645.43	61.2881	3194.25	48.819
2015-09-09	NR1511_1_30		122.236	1242.63	323.166	626.26	13.9762	19907.5	0.0068967	0.00348978	0.0004015	0.0582162	15.3025	2.45052	0.256927	3.29763	2.31394	4.10846	0.0653487	2.45052	0.596458	3227.96	52.0277	408.072	19.3509	1216.57	56.6469
2015-09-09	NR1511_1_31		13.6728	1197.63	209.954	368.173	9.21429	20708	0.00437113	0.0033634	0.000264703	0.060557	17.386	2.37161	0.176145	4.05208	1.39629	4.69509	0.0575175	2.37161	0.505125	2616.9	67.4327	360.51	16.609	887.366	54.0905
2015-09-09	NR1511_1_32		21.8004	2798.16	1269.62	2867.85	11	24625.2	0.00438817	0.00785827	0.000316002	0.0720122	8.79775	3.44415	0.451259	2.58893	7.06904	4.30868	0.113665	3.44415	0.799351	4089.36	38.4987	694	45.1629	2120.15	73.8998
2015-09-09	NR1511_1_33		-36.8948	1138.26	255.689	491.227	24.6905	17723.2	0.0136854	0.00319664	0.000709293	0.0518284	15.4303	2.69844	0.22655	3.13104	2.02346	4.1334	0.0648075	2.69844	0.652838	3027.83	50.2123	404.797	21.1399	1123.42	54.6779
2015-09-09	NR1511_1_34		99.977	2105.06	1038.74	2441.86	33.5	16209.8	0.020302	0.00591179	0.000962369	0.0474027	7.77526	2.91404	0.502471	2.03275	8.9064	3.55298	0.128613	2.91404	0.820167	4248.47	29.9512	779.948	42.6722	2328.46	62.8814
2015-09-09	NR1511_1_35		-81.3562	1246.23	253.665	523.819	16.3572	19602.3	0.00819728	0.00349988	0.000469898	0.0573237	15.9306	2.52577	0.212917	3.30916	1.84197	4.16293	0.0627722	2.52577	0.606728	2927.88	53.5249	392.463	19.2053	1060.57	53.3654
2015-09-09	NR1511_1_36		553.249	9618.46	5520.68	13596.8	1181.45	43506.6	0.266766	0.0270122	0.0339399	0.127228	4.3077	3.38593	0.57646	1.07797	18.4429	3.55338	0.232142	3.38593	0.952875	4449.76	15.7101	1345.72	81.7266	3013.13	66.241
2015-09-09	NR1511_1_37		216.043	7761.93	3157.29	7654.08	1325.36	93544.4	0.139183	0.0217984	0.038074	0.273554	11.5471	7.1652	0.431112	1.96174	5.14542	7.4289	0.0866015	7.1652	0.964504	4021.3	29.2914	535.407	73.2088	1843.64	119.054
2015-09-09	NR1511_1_38		579.822	11655.3	6825.13	16500.1	863.146	72273.7	0.117321	0.0327325	0.0247959	0.211352	6.17159	3.12938	0.588465	0.784861	13.141	3.2263	0.162033	3.12938	0.969959	4479.77	11.4204	968.064	56.0148	2689.83	59.1298
2015-09-09	NR1511_1_39		681.071	19321.1	11800.8	28625.5	2071.84	76175.2	0.267185	0.0542607	0.0595185	0.222761	4.89014	6.05057	0.596101	1.38169	16.7998	6.20633	0.204493	6.05057	0.974904	4498.52	20.0851	1199.41	131.098	2923.48	112.488
2015-09-09	NR1511_1_40		449.605	16482.6	8526.4	20331.9	2347.34	125848	0.183231	0.0462892	0.0674328	0.368021	7.73147	2.85233	0.512468	1.68412	9.13503	3.3124	0.129341	2.85233	0.861105	4277.48	24.774	784.108	41.9803	2351.63	58.8889
2015-09-09	NR1511_1_41		320.486	12909	6862.23	16542.7	1410.44	75221	0.184198	0.0362534	0.0405181	0.219971	5.99046	3.18768	0.543651	1.03363	12.5074	3.35107	0.166932	3.18768	0.951242	4364.16	15.1328	995.185	58.5253	2643.28	61.1362
2015-09-09	NR1511_1_42		318.008	7604.11	4181.85	9613.09	446.122	47998.1	0.0913062	0.0213552	0.0128159	0.140362	6.25758	1.81181	0.54835	1.24458	12.077	2.1981	0.159806	1.81181	0.824263	4376.76	18.2089	955.7	32.1061	2610.4	40.4099
2015-09-09	NR1511_1_43		183.729	3380.17	1553.87	3661.84	37.5244	32591.1	0.0113106	0.00949277	0.00107798	0.0953071	9.80605	2.8018	0.462609	2.30544	6.50168	3.62839	0.101978	2.8018	0.77219	4126.26	34.2085	625.989	33.3423	2046.13	61.9338
2015-09-09	NR1511_1_44		395.769	7249.86	4502.6	10726.9	196.001	34842.8	0.0552605	0.0203603	0.00563059	0.101892	4.90304	3.29793	0.631988	1.1775	17.7644	3.50184	0.203955	3.29793	0.941772	4583.32	17.043	1196.53	71.6308	2977.06	65.1864
2015-09-09	NR1511_1_45		143.124	5963.82	3537.96	8522.49	101	31590.5	0.0314076	0.0167486	0.00290147	0.0923811	5.31417	2.01381	0.585937	1.20326	15.1957	2.3459	0.188176	2.01381	0.858438	4473.51	17.5141	1111.49	40.9892	2827.58	43.7424
2015-09-09	NR1511_1_46		169.454	4072.07	2420.11	5969.69	29.4524	22994.3	0.0125826	0.0114359	0.000846091	0.0672428	5.62942	2.09965	0.596241	1.37451	14.597	2.50954	0.177638	2.09965	0.836667	4498.86	19.9804	1054.06	40.705	2789.34	46.6092
2015-09-09	NR1511_1_47		251.521	5846.73	3252.85	7908.2	233.116	40679.6	0.0562945	0.0164198	0.00669682	0.118961	7.11137	1.78035	0.565096	1.59688	10.9515	2.39158	0.14062	1.78035	0.744424	4420.72	23.3083	848.167	28.2363	2519.02	43.5561
2015-09-09	NR1511_1_48		226.255	4917.87	2746.79	6568.4	486.599	33479	0.142781	0.0138112	0.0139787	0.0979036	6.92401	2.6609	0.557811	1.4763	11.1029	3.043	0.144425	2.6609	0.874432	4401.77	21.5701	869.636	43.1496	2531.8	55.1643
2015-09-09	NR1511_1_49		13665.9	260448	213221	525401	9782.88	142409	0.674837	0.731436	0.281037	0.416451	0.511424	6.24204	0.814767	0.368438	219.563	6.25291	1.95533	6.24204	0.998263	4947.77	5.24135	6985.39	511.612	5479.19	119.135
2015-09-09	NR1511_1_50		22548.4	444504	369851	919945	23529	276923	0.834672	1.24833	0.675928	0.809813	0.619735	3.44112	0.815443	0.460071	181.34	3.47174	1.61359	3.44112	0.99118	4948.95	6.54457	6193.24	268.248	5285.96	67.8013
2015-09-09	NR1511_1_51		29069.3	534429	441367	1101473	13060	201469	0.636802	1.50088	0.375179	0.589162	0.387498	4.57456	0.822062	0.427455	292.375	4.59449	2.58066	4.57456	0.995663	4960.45	6.07749	8222.7	411.647	5768.85	88.9709
2015-09-09	NR1511_1_52		1597.04	33021.3	23835.6	57993.8	2911.73	107046	0.267208	0.0927361	0.0836463	0.313038	3.2911	4.69275	0.720608	0.967416	30.1761	4.79143	0.303849	4.69275	0.979405	4772.37	13.8737	1710.37	139.476	3492.57	90.0664
2015-09-09	NR1511_1_53		4588.03	92531.5	74204.5	185742	3740.19	127407	0.288383	0.259863	0.107446	0.372581	1.43764	3.25257	0.794569	0.576584	76.1706	3.30328	0.695584	3.25257	0.984649	4912.03	8.21558	3403.88	169.775	4412.87	64.1433
2015-09-09	NR1511_1_54		2406.86	55562.6	39486.6	94896.4	8056.63	185142	0.427483	0.156041	0.231446	0.541415	3.2807	5.56449	0.686359	1.235	28.833	5.69989	0.304813	5.56449	0.976245	4702.42	17.7704	1715.13	165.453	3447.85	106.127
2015-09-09	NR1511_1_55		8561.01	195306	135312	331883	46994.4	832459	0.554567	0.54849	1.35003	2.43438	4.18498	7.5167	0.677873	1.34452	22.3234	7.636	0.23895	7.5167	0.984377	4684.51	19.3631	1381.24	184.25	3197.91	138.527
2015-09-09	NR1511_1_56		22949	446407	366528	905971	29015.6	509821	0.559094	1.25368	0.833543	1.49088	1.05365	4.04108	0.819313	0.360138	107.167	4.0571	0.949085	4.04108	0.996052	4955.69	5.12148	4302.08	248.835	4755.73	78.5132
2015-09-09	NR1511_1_57		207.555	5074.66	3331.91	7325.84	297.311	25633.3	0.11394	0.0142515	0.00854097	0.0749601	5.00527	3.07353	0.647819	3.12877	17.8374	4.38586	0.19979	3.07353	0.700781	4619.1	45.2044	1174.19	65.6508	2981.01	81.0184
2015-09-09	NR1511_1_58		400.902	6784.59	4911.73	12243	217.106	20093.8	0.10614	0.0190536	0.00623687	0.058761	3.10215	3.41604	0.722258	3.64568	32.0874	4.99603	0.322357	3.41604	0.683751	4775.65	52.2744	1801.23	106.48	3552.98	93.9114
2015-09-09	NR1511_1_59		301.57	6006.58	3876.45	9263.94	53.3781	19004.8	0.0275911	0.0168687	0.00153341	0.0555763	3.17551	5.32513	0.669062	2.37502	29.0375	5.83076	0.31491	5.32513	0.913283	4665.66	34.2354	1764.82	162.364	3454.79	108.462
2015-09-09	NR1511_1_60		193.841	5721.1	3566.22	8844.52	52.1586	22620.3	0.0226515	0.016067	0.00149838	0.0661492	4.00285	1.96883	0.620806	1.46249	21.3743	2.45258	0.249822	1.96883	0.802757	4557.46	21.1956	1437.56	50.5399	3155.72	46.499
2015-09-09	NR1511_1_61		251.208	4398.94	2797.69	6771.93	10.4048	14139.1	0.00722906	0.0123539	0.000298902	0.0413473	3.18786	1.86355	0.633166	1.38713	27.3731	2.32313	0.31369	1.86355	0.80217	4586.02	20.0744	1758.84	57.1177	3396.91	44.524
2015-09-09	NR1511_1_62		-58.9836	2336.62	1188.65	3008.57	13.1342	20294.2	0.00635769	0.00656211	0.00037731	0.059347	8.63691	2.90128	0.512156	2.0265	8.1724	3.53895	0.115782	2.90128	0.819815	4276.58	29.8122	706.241	38.6987	2250.29	62.0946
2015-09-09	NR1511_1_63		144.419	2512.83	1217.16	2860.93	27.0714	17845.6	0.0149022	0.00705695	0.000777692	0.0521863	7.20969	2.55312	0.489228	2.64797	9.35192	3.67834	0.138702	2.55312	0.694096	4209.08	39.1032	837.319	39.971	2373.12	65.3347
2015-09-09	NR1511_1_64		-72.5873	3576.03	1261.98	2771.35	87.7859	29681.7	0.029054	0.0100428	0.00252186	0.0867989	8.39625	2.38247	0.349233	1.78532	5.7324	2.97717	0.119101	2.38247	0.800248	3703.66	27.2051	725.386	32.6079	1936.27	50.2165
2015-09-09	NR1511_1_65		201.503	6787.18	3727.05	9139.76	9.75001	25248.1	0.00379356	0.0190609	0.000280092	0.0738337	3.75582	3.3922	0.548112	1.28997	20.1127	3.62919	0.266254	3.3922	0.934698	4376.12	18.8736	1521.76	91.3114	3096.79	67.8886
2015-09-09	NR1511_1_66		41.4607	2047.91	549.441	1159.2	49.7501	31126.4	0.0157013	0.0057513	0.00142919	0.0910238	15.3404	1.93676	0.269945	2.62692	2.42518	3.2637	0.0651872	1.93676	0.593424	3305.71	41.1953	407.095	15.2632	1250.09	45.8757
2015-09-09	NR1511_1_67		280.256	11063.9	5538.69	14146.4	97.3097	42276.1	0.0226116	0.0310716	0.00279545	0.123629	3.75102	4.73569	0.493937	1.46298	18.1479	4.95651	0.266594	4.73569	0.955447	4223.22	21.5867	1523.49	127.248	2997.61	91.1793
2015-09-09	NR1511_1_68		47.0918	4408.86	1469.07	3483.77	343.74	30952.4	0.109095	0.0123817	0.00987475	0.0905149	7.01887	2.65212	0.335582	2.86628	6.58926	3.90504	0.142473	2.65212	0.679154	3642.77	43.8587	858.632	42.5007	2057.91	66.6189
2015-09-09	NR1511_1_69		235.346	8704.16	4757.28	11949.3	219.929	6618.65	0.326425	0.0244445	0.006318	0.0193551	0.788423	4.16363	0.546655	1.15013	95.5565	4.31956	1.26835	4.16363	0.963901	4372.23	16.8312	5279.96	293.38	4640.43	83.2995
2015-09-09	NR1511_1_70		1652.38	42788.6	22654.4	55603.8	13646.7	84581.5	1.58497	0.120166	0.392033	0.247344	1.93831	2.90369	0.524803	1.10379	37.3145	3.1064	0.515913	2.90369	0.934742	4312.43	16.2057	2681.82	126.166	3701.91	59.6504
2015-09-09	NR1511_1_71		208.684	9739.44	5197.28	12511	315.575	13429.8	0.230836	0.027352	0.00906565	0.0392731	1.34957	9.21519	0.518941	1.50057	52.9943	9.33657	0.740977	9.21519	0.987	4295.93	22.0513	3574.19	486.814	4050.24	170.873
2015-09-09	NR1511_1_72		206.988	6657.52	3358.22	8209.95	205.644	8385.03	0.240925	0.0186968	0.00590761	0.0245206	1.16061	7.67608	0.537486	3.46924	63.8242	8.42364	0.861613	7.67608	0.911254	4347.46	50.8375	4006.08	442.506	4235.85	155.832
2015-09-09	NR1511_1_73		198.412	3447.44	2022.75	4763.19	244.843	10972.2	0.219211	0.00968168	0.00703368	0.0320864	3.00784	3.28416	0.564601	1.361	25.8698	3.555	0.332465	3.28416	0.923814	4419.44	19.8667	1850.32	104.792	3341.63	67.2311
2015-09-09	NR1511_1_74		303.349	6409.24	3384.83	7965.41	358.258	11928.4	0.295041	0.0179995	0.0102918	0.0348827	1.9152	11.8823	0.511886	1.80539	36.8353	12.0187	0.522139	11.8823	0.988653	4275.81	26.5605	2708.24	505.187	3689.13	213.512
2015-09-09	NR1511_1_75		1037.19	41980.1	12270.5	29492.8	20076.5	114682	1.71975	0.117896	0.576746	0.335366	2.73416	4.87326	0.283673	4.92782	14.2988	6.93052	0.365744	4.87326	0.70316	3383.26	76.8237	2009.34	166.1	2769.74	123.693
2015-09-09	NR1511_1_76		1370.06	106078	15973.6	38269.6	43303.7	220726	1.92726	0.297907	1.244	0.645476	2.15425	6.80471	0.150422	5.76332	9.6232	8.9174	0.464198	6.80471	0.763083	2350.73	98.5016	2458.07	272.306	2399.39	152.067
2015-09-09	NR1511_1_77		1394.48	110795	17009.1	41156.2	37863.9	191867	1.93863	0.311153	1.08773	0.561082	1.76368	5.37611	0.152067	5.68367	11.8829	7.82347	0.566996	5.37611	0.687178	2369.3	96.9526	2895.47	246.045	2595.22	136.888
2015-09-09	NR1511_1_78		907.909	17284.5	8381.95	19877.7	23914.5	127028	1.8494	0.0485412	0.687	0.371471	7.30669	2.48332	0.480895	1.31111	9.07059	2.80818	0.136861	2.48332	0.884316	4183.69	19.3896	826.887	38.4288	2345.15	50.1078
2015-09-09	NR1511_1_79		4531.4	172839	73241.1	179031	18391.1	108137	1.67072	0.485396	0.528328	0.316227	0.626653	3.53951	0.412359	1.54136	90.6889	3.86056	1.59578	3.53951	0.916839	3954.76	23.1088	6149.15	274.608	4587.91	74.7255
2015-09-09	NR1511_1_80		30.4526	1480.39	928.417	2198.98	29.4524	3673.87	0.0787531	0.00415749	0.000846091	0.0107436	2.43489	4.87836	0.608145	2.34477	34.4218	5.41261	0.410696	4.87836	0.901295	4527.58	34.0342	2218.1	180.557	3622.2	101.562
2015-09-09	NR1511_1_81		118.924	3896.71	2250.31	5441.97	340.169	4328.52	0.772014	0.0109434	0.00977216	0.012658	1.02823	10.637	0.565038	2.46961	75.7342	10.9199	0.972542	10.637	0.974091	4420.57	36.0471	4379.2	643	4407.12	198.202
2015-09-09	NR1511_1_82		97.8604	2215.8	1198.89	2868.86	17.5476	6573.37	0.0262241	0.00622279	0.000504098	0.0192227	2.95052	3.90049	0.545307	1.762	25.4711	4.28001	0.338923	3.90049	0.911327	4368.61	25.7904	1881.49	126.055	3326.45	80.3674
2015-09-09	NR1511_1_83		-123.168	680.361	290.576	661.627	11.3205	6113.27	0.0181913	0.00191071	0.000325209	0.0178772	9.13819	2.89169	0.433904	4.12263	6.54394	5.03566	0.109431	2.89169	0.574241	4030.94	61.5205	669.442	36.6693	2051.83	85.044
2015-09-09	NR1511_1_84		199.679	3006.72	1800.91	4334.02	bd	6877.27	bdl	0.00844399	-4.30911e-05	0.0201114	2.3336	3.63889	0.610955	2.06346	36.0819	4.18323	0.428523	3.63889	0.869876	4534.27	29.9408	2299.06	139.221	3668.71	79.4681
2015-09-09	NR1511_1_85		201.05	3971.2	2384.15	5656.93	814.367	10359.3	0.772253	0.0111526	0.0233946	0.030294	2.13602	9.89517	0.559581	1.7978	36.1047	10.0572	0.46816	9.89517	0.983893	4406.4	26.261	2475.49	394.49	3669.33	181.5
2015-09-09	NR1511_1_86		161.847	1680.4	1002.78	2509.28	bdl	4899.26	d	0.00471918	-4.30911e-05	0.014327	2.90974	3.27638	0.581856	2.11835	27.5592	3.90154	0.343673	3.27638	0.839764	4463.33	30.8503	1904.32	107.147	3403.54	73.7152
2015-09-09	NR1511_1_87		86.9089	1543.2	893.868	2170.24	11.5953	4623.51	0.0246365	0.00433388	0.000333101	0.0135207	3.07842	5.37582	0.580626	2.72663	25.994	6.02776	0.324842	5.37582	0.891843	4460.25	39.7153	1813.33	167.74	3346.31	111.52
2015-09-09	NR1511_1_88		-110.25	1535.27	844.57	2021.44	8.02382	4247.27	0.0185584	0.00431161	0.000230503	0.0124204	2.74701	4.12853	0.53675	2.24544	26.9289	4.69966	0.364032	4.12853	0.878475	4345.45	32.9079	2001.26	140.513	3380.88	88.088
2015-09-09	NR1511_1_89		233.569	8069.67	2261.4	6267.43	4910.12	31217.8	1.54511	0.0226626	0.141055	0.091291	3.45206	6.94476	0.309819	2.916	12.369	7.53212	0.289682	6.94476	0.92202	3520.02	45.0061	1639.94	198.042	2632.83	132.486
2015-09-09	NR1511_1_90		685.916	21852.5	5747.58	12985.4	41352.4	204882	1.98275	0.0613699	1.18795	0.599141	9.5555	3.83575	0.252994	4.38241	3.64891	5.82396	0.104652	3.83575	0.658616	3203.6	69.2761	641.613	46.6817	1560.27	88.829
2015-09-09	NR1511_1_91		273.171	13188.5	3115.76	7439.41	14334.9	90184.8	1.56147	0.0370384	0.411805	0.26373	6.87276	3.09492	0.242755	2.96651	4.86791	4.28704	0.145502	3.09492	0.721925	3138.12	47.1414	875.699	50.4857	1796.72	69.7702
2015-09-09	NR1511_1_92		-122.09	2786.57	609.93	1233.45	7.03659	41504.5	0.00166547	0.00782573	0.000202143	0.121373	14.9257	2.14585	0.222234	2.58665	2.05203	3.36087	0.0669986	2.14585	0.63848	2996.95	41.5906	418.048	17.3486	1132.97	44.882
2015-09-09	NR1511_1_93		-13.1841	1640.15	271.896	507.239	24.6905	29938	0.00810172	0.00460615	0.000709293	0.0875485	18.0936	2.18913	0.165808	3.39055	1.26295	4.03586	0.0552683	2.18913	0.542421	2515.76	56.9835	346.785	14.7651	829.233	44.7408
2015-09-09	NR1511_1_94		86.1659	5085.68	2334.58	4900.26	bd	28805	bdl	0.0142825	-4.30911e-05	0.0842352	5.68923	5.91532	0.448532	2.15912	10.8654	6.29705	0.175771	5.91532	0.93938	4080.35	32.1244	1043.83	113.015	2511.68	110.827
2015-09-09	NR1511_1_95		67.3213	2110.18	1013.04	2453.84	bd	13339.8	bdl	0.00592618	-4.30911e-05	0.03901	6.32139	7.07362	0.476139	2.58521	10.3807	7.53123	0.158193	7.07362	0.939239	4168.98	38.2644	946.727	123.377	2469.33	130.716
2015-09-09	NR1511_1_96		18.0393	3989.16	1737.3	4016.8	11.9146	30213.8	0.00387388	0.0112031	0.000342276	0.088355	7.7055	5.7873	0.410609	3.04645	7.34402	6.54016	0.129777	5.7873	0.884887	3948.39	45.6919	786.596	85.145	2154.18	110.645
2015-09-09	NR1511_1_97		63.0239	3056.72	1343.83	3049.58	11.9146	25350.5	0.00461704	0.00858441	0.000342276	0.0741333	8.22025	3.07532	0.427154	2.80754	7.16152	4.16412	0.121651	3.07532	0.738528	4007.53	41.9556	740.058	42.8599	2131.73	71.6162
2015-09-09	NR1511_1_98		78.2676	2925.24	1108.74	2411.31	8.02382	30056.7	0.00262247	0.00821516	0.000230503	0.0878956	10.3719	1.79476	0.385531	2.05511	5.12281	2.72849	0.0964147	1.79476	0.657787	3853.59	31.0086	593.363	20.3161	1839.9	45.3324
2015-09-09	NR1511_1_99		97.3875	2524.59	539.36	1015.59	9.47562	43143	0.00215758	0.00708998	0.00027221	0.126164	16.5333	2.19219	0.205059	2.80148	1.70932	3.55725	0.0604839	2.19219	0.616259	2866.89	45.5569	378.568	16.0997	1012.03	44.5828
2015-09-09	NR1511_2_01		348.988	4354.71	3109.93	7438.4	4.37344	14100.3	0.00304694	0.0122296	0.000125637	0.0412339	3.08858	3.39062	0.71119	1.35978	31.7345	3.65313	0.323773	3.39062	0.928143	4753.49	19.5181	1808.13	106.042	3542.09	69.4873
2015-09-09	NR1511_2_02		164.805	2903.69	1688.33	3893.68	bdl	18006.6	bdl	0.00815464	-4.53591e-05	0.0526572	6.06317	4.18998	0.586977	2.53968	13.3422	4.89958	0.16493	4.18998	0.855171	4476.09	36.9615	984.118	76.032	2704.18	88.5826
2015-09-09	NR1511_2_03		-64.4227	1457.69	360.274	697.189	bdl	22823.8	bdl	0.00409374	-4.53591e-05	0.0667441	15.403	2.81408	0.242155	4.07706	2.16668	4.95394	0.0649225	2.81408	0.568049	3134.19	64.8103	405.493	22.081	1170.42	66.6009
2015-09-09	NR1511_2_04		99.8772	1631.24	364.989	738.44	bdl	26540.6	bdl	0.00458114	-4.53591e-05	0.0776135	15.7424	2.64677	0.222595	3.34841	1.94873	4.26817	0.0635229	2.64677	0.620119	2999.55	53.827	397.014	20.3499	1098.01	55.7245
2015-09-09	NR1511_2_05		288.101	3053.16	1908.69	4764.02	19.1528	19526	0.00963584	0.0085744	0.000550209	0.0571003	6.61679	5.00747	0.61247	1.89253	12.7569	5.35317	0.151131	5.00747	0.935422	4537.86	27.4555	907.299	84.2084	2661.86	96.1123
2015-09-09	NR1511_2_06		44.9931	2880.51	947.889	2069.75	11.8357	35623.5	0.00326383	0.00808956	0.000340009	0.104175	12.4528	2.12056	0.332681	2.58782	3.68187	3.34568	0.0803035	2.12056	0.633821	3629.48	39.6341	497.934	20.291	1567.44	52.0727
2015-09-09	NR1511_2_07		-62.6525	3739.15	1816.18	4205.32	5.56391	35757.4	0.00152857	0.0105009	0.000159837	0.104566	9.39496	2.03706	0.488603	1.85325	7.1675	2.75394	0.10644	2.03706	0.73969	4207.19	27.3704	652.04	25.2162	2132.47	47.9294
2015-09-09	NR1511_2_08		47.4406	2525.88	911.381	2106.66	15.0877	29433.1	0.00503568	0.00709362	0.000433431	0.086072	11.8673	2.30373	0.361933	2.59721	4.20323	3.47169	0.0842654	2.30373	0.663575	3757.99	39.4333	521.533	23.0418	1674.65	55.4124
2015-09-09	NR1511_2_09		9.04123	1918.25	332.639	566.028	bdl	32845.2	bdl	0.00538716	-4.53591e-05	0.0960501	16.9181	1.83516	0.170883	2.48505	1.39205	3.08922	0.0591083	1.83516	0.594052	2566.31	41.558	370.2	13.1912	885.566	35.8674
2015-09-09	NR1511_2_10		115.706	6305.14	4284.82	10296.9	bdl	30180.2	bdl	0.0177072	-4.53591e-05	0.0882568	4.6979	1.62756	0.667822	1.42853	19.5913	2.16556	0.212861	1.62756	0.751566	4662.99	20.5946	1244.04	36.7225	3071.4	41.0026
2015-09-09	NR1511_2_11		491.202	8715.69	5880.62	14190.2	bdl	38790.6	bdl	0.0244769	-4.53591e-05	0.113436	4.39681	1.69028	0.667119	0.813717	20.9108	1.87595	0.227437	1.69028	0.901027	4661.47	11.732	1321.05	40.2543	3134.47	35.7216
2015-09-09	NR1511_2_12		26.94	2181.07	758.964	1723.48	24.0308	25513.4	0.00925275	0.00612526	0.000690343	0.0746095	11.5916	2.64282	0.35423	2.03486	4.21163	3.33544	0.0862697	2.64282	0.792345	3725.29	30.9626	533.438	27.0038	1676.29	53.3135
2015-09-09	NR1511_2_13		51.5063	3195.34	1295.11	2754.88	80.5641	36280.8	0.021814	0.00897369	0.0023144	0.106097	11.0161	5.94694	0.348715	6.29324	4.36265	8.65858	0.0907765	5.94694	0.686826	3701.4	95.9125	560.128	63.4949	1705.29	133.827
2015-09-09	NR1511_2_14		574.111	12449.1	8902.14	21390.3	302.371	26946.1	0.110234	0.0349616	0.00868633	0.0787991	2.68081	9.05149	0.706806	1.43258	36.3362	9.16416	0.373021	9.05149	0.987706	4744.62	20.5717	2043.6	309.498	3675.65	166.661
2015-09-09	NR1511_2_15		90.1655	1972.93	824.077	1882.56	93.5432	18913.6	0.0485857	0.00554072	0.00268725	0.0553095	9.73353	2.47392	0.427878	2.12597	6.05837	3.26191	0.102738	2.47392	0.758428	4010.06	31.7654	630.432	29.6478	1984.28	55.3221
2015-09-09	NR1511_2_16		30.7767	2631.78	1350.89	2699.35	320.22	17026.3	0.184756	0.00739103	0.00919909	0.0497906	8.17654	6.06814	0.484565	3.13388	8.16749	6.82961	0.122301	6.06814	0.888505	4194.93	46.3162	743.795	84.6972	2249.75	116.605
2015-09-09	NR1511_2_17		374.224	8428.46	5747.79	13785.2	394.674	23451.6	0.165324	0.0236702	0.011338	0.0685802	2.84427	2.2903	0.684775	1.0621	33.1805	2.52458	0.351584	2.2903	0.907198	4699.1	15.2851	1942.16	76.3574	3585.98	48.5872
2015-09-09	NR1511_2_18		187.532	5601.91	3234.79	7912.17	257.173	36286.4	0.0696227	0.0157322	0.0073879	0.106113	6.47497	2.85746	0.573199	1.51772	12.2004	3.23552	0.154441	2.85746	0.883155	4441.49	22.1286	925.81	49.0981	2619.94	58.9815
2015-09-09	NR1511_2_19		357.245	9000.29	6179.53	14743.7	57.1711	29000.6	0.019366	0.0252762	0.00164238	0.0848074	3.23276	2.13988	0.687354	1.03453	29.303	2.37684	0.309333	2.13988	0.900308	4704.51	14.8843	1737.42	64.8527	3463.72	45.6341
2015-09-09	NR1511_2_20		613.371	11972.8	8862.33	21216.4	105.738	28039.3	0.0370455	0.0336241	0.00303759	0.0819961	2.35346	3.95595	0.742086	0.789115	43.4563	4.03388	0.424906	3.95595	0.980679	4814.45	11.2943	2282.71	150.325	3852.88	77.0753
2015-09-09	NR1511_2_21		1275.17	27494.2	21846	53705.5	203.422	31536.1	0.0633666	0.0772141	0.00584378	0.0922218	1.16725	4.04467	0.789692	0.613625	93.2392	4.09095	0.856712	4.04467	0.988687	4903.26	8.74683	3989.09	236.232	4615.77	79.0384
2015-09-09	NR1511_2_22		-84.3684	1624.58	448.291	939.208	bdl	24612.1	bdl	0.00456241	-4.53591e-05	0.0719738	15.0337	2.75086	0.280331	3.53982	2.56988	4.48303	0.0665174	2.75086	0.613616	3364.78	55.262	415.14	22.0821	1292.11	63.5094
2015-09-09	NR1511_2_23		207.346	4807.76	3157.51	7362.02	7.94487	18253.8	0.00427566	0.013502	0.000228235	0.0533801	3.79926	4.11457	0.682384	1.68495	24.7534	4.4462	0.263209	4.11457	0.925412	4694.06	24.2546	1506.24	109.598	3298.54	83.2757
2015-09-09	NR1511_2_24		260.724	6214.15	4500.07	10901.3	10.3258	17360.8	0.00584285	0.0174516	0.000296634	0.0507687	2.76912	9.1825	0.679082	2.56617	33.7977	9.53433	0.361126	9.1825	0.963098	4687.08	36.9522	1987.51	306.689	3604.15	172.531
2015-09-09	NR1511_2_25		335.559	9072.56	6607.95	15806.6	57.1711	23972.9	0.0234275	0.0254791	0.00164238	0.0701046	2.64219	3.79147	0.718347	0.951835	37.4694	3.90912	0.378474	3.79147	0.969903	4767.86	13.6531	2069.15	132.835	3706.01	74.5189
2015-09-09	NR1511_2_26		894.525	18934.3	14964.4	36702.6	190.088	25492.7	0.0732505	0.0531746	0.00546074	0.0745489	1.2917	5.78738	0.78441	0.949078	83.6924	5.86469	0.774171	5.78738	0.986819	4893.69	13.5344	3695.94	317.635	4507.31	111.356
2015-09-09	NR1511_2_27		308.983	10287.4	6509.43	15639	69.1529	24950.5	0.0272271	0.0288908	0.00198658	0.0729633	2.44671	13.1882	0.548002	3.62502	30.8678	13.6773	0.408711	13.1882	0.964238	4375.83	53.0387	2209.03	475.354	3514.84	238.658
2015-09-09	NR1511_2_28		515.554	9843.45	6915.52	16445.8	27.1711	26575.7	0.0100437	0.0276441	0.000780554	0.0777161	2.65001	2.13418	0.701296	1.54179	36.4721	2.63284	0.377358	2.13418	0.8106	4733.38	22.1518	2063.93	74.9478	3679.34	50.7503
2015-09-09	NR1511_2_29		1013.26	18463.8	14876.6	37180.4	7.17106	18063.2	0.00389996	0.0518531	0.000206006	0.0528226	0.959473	3.74679	0.802144	0.74441	115.219	3.82002	1.04224	3.74679	0.980829	4925.55	10.6004	4603.04	241.932	4828.63	74.1348
2015-09-09	NR1511_2_30		51.784	5617.58	3788.51	9044.11	6.75439	24511.2	0.00270702	0.0157762	0.000194036	0.0716789	4.33897	2.45701	0.67515	1.35853	21.4447	2.80757	0.230469	2.45701	0.875135	4678.72	19.5704	1336.96	59.0617	3158.91	53.0639
2015-09-09	NR1511_2_31		19.8205	1642.55	290.575	533.101	bdl	27459	bdl	0.0046129	-4.53591e-05	0.0802992	16.9096	2.00819	0.178475	4.00212	1.45462	4.4777	0.059138	2.00819	0.448488	2638.75	66.4621	370.381	14.4405	911.786	52.5053
2015-09-09	NR1511_2_32		186.092	3577.83	2756.18	6522.69	bdl	6463.72	bdl	0.0100479	-4.53591e-05	0.018902	1.81947	3.28094	0.775663	1.47834	58.7536	3.59862	0.549611	3.28094	0.911722	4877.69	21.0974	2823.55	148.311	4153.15	69.428
2015-09-09	NR1511_2_33		486.436	11065.4	8880.03	21541.3	5.56391	14764.1	0.00370206	0.0310758	0.000159837	0.043175	1.37922	4.26368	0.792455	1.10058	79.1855	4.40344	0.725046	4.26368	0.968262	4908.24	15.6845	3514.93	227.002	4451.79	84.6772
2015-09-09	NR1511_2_34		111.145	3420.08	2292.88	5411.85	bdl	16536.6	bdl	0.00960485	-4.53591e-05	0.0483584	4.89763	3.94753	0.65533	2.08322	18.4408	4.46349	0.20418	3.94753	0.884403	4635.75	30.0734	1197.74	85.7244	3013.02	82.5335
2015-09-09	NR1511_2_35		127.321	1697.32	635.563	1378.69	bdl	16025.7	bdl	0.0047667	-4.53591e-05	0.0468643	9.8046	3.03363	0.376244	2.66096	5.28866	4.0353	0.101993	3.03363	0.751774	3816.75	40.2457	626.078	36.0983	1867.03	66.6785
2015-09-09	NR1511_2_36		730.906	13457	10645.5	25273.8	105.738	19486.8	0.0533044	0.0377924	0.00303759	0.0569856	1.48404	5.54074	0.785557	0.919121	72.9522	5.61646	0.673837	5.54074	0.986519	4895.77	13.1059	3320.67	281.349	4369.62	106.706
2015-09-09	NR1511_2_37		439.922	11543.5	8608.2	21082.3	bdl	29892.6	bdl	0.0324186	-4.53591e-05	0.0874157	2.52199	6.45296	0.740156	1.24653	40.4469	6.57226	0.396512	6.45296	0.981849	4810.72	17.8442	2152.96	231.996	3781.71	122.545
2015-09-09	NR1511_3_01		26.1046	3710.45	1405.45	3065.65	50.9387	41075.6	0.0121825	0.0104203	0.00146334	0.120118	10.8183	4.22872	0.352743	6.67812	4.49372	7.90439	0.092436	4.22872	0.534984	3718.89	101.658	569.928	45.9677	1729.81	123.479
2015-09-09	NR1511_3_02		28.1538	2566.84	605.573	1228.61	5.70055	39650.7	0.00141233	0.00720866	0.000163762	0.115951	15.7045	1.91538	0.239848	2.53105	2.10484	3.1741	0.0636762	1.91538	0.603442	3118.96	40.2844	397.944	14.7664	1150.39	42.7837
2015-09-09	NR1511_3_03		181.374	3702.11	1339.72	2850	bdl	44529.6	bdl	0.0103969	-4.14338e-05	0.130219	11.7807	1.95063	0.358888	2.3478	4.19849	3.0524	0.0848843	1.95063	0.639049	3745.15	35.6769	525.211	19.6474	1673.72	48.8679
2015-09-09	NR1511_3_04		84.1932	3936.66	2013.57	4616.99	bdl	30451.4	bdl	0.0110556	-4.14338e-05	0.0890498	7.71648	2.30409	0.51139	1.89928	9.13354	2.98598	0.129593	2.30409	0.771635	4274.38	27.944	785.542	33.9907	2351.48	53.2342
2015-09-09	NR1511_3_05		104.686	4920.73	2863.75	6903.13	21.1768	24820.8	0.00838136	0.0138193	0.000608353	0.072584	5.05395	3.42239	0.591383	1.68388	16.1266	3.81421	0.197865	3.42239	0.897273	4486.97	24.4927	1163.84	72.4761	2884.33	70.4346
2015-09-09	NR1511_3_06		170.24	3666.6	1505.4	3810.95	bdl	19050.3	bdl	0.0102972	-4.14338e-05	0.0557092	5.06942	11.2463	0.564671	2.60526	15.3512	11.5441	0.197261	11.2463	0.974202	4419.62	38.029	1160.59	234.577	2837.29	199.212
2015-09-09	NR1511_3_07		21.6269	1619.21	878.912	2109.58	bdl	11414.6	bdl	0.00454734	-4.14338e-05	0.03338	7.08117	3.00109	0.540348	2.205	10.5166	3.72405	0.14122	3.00109	0.805866	4355.24	32.298	851.555	47.703	2481.38	66.8129
2015-09-09	NR1511_3_08		-7.35962	2377.59	1037.94	2356.72	bdl	24201.4	bdl	0.00667715	-4.14338e-05	0.0707728	9.85547	2.49966	0.432945	1.79606	6.05427	3.07801	0.101467	2.49966	0.812104	4027.64	26.8073	622.997	29.6199	1983.69	52.2771
2015-09-09	NR1511_3_09		-169.984	1110.26	260.527	481.031	bdl	17914.9	bdl	0.00311801	-4.14338e-05	0.0523891	16.0047	2.67585	0.239506	3.57189	2.0624	4.46302	0.0624815	2.67585	0.59956	3116.69	56.861	390.699	20.2562	1136.42	59.2737
2015-09-09	NR1511_3_10		54.812	859.655	552.572	1374.96	bdl	3911.49	bdl	0.00241423	-4.14338e-05	0.0114385	4.66087	3.34646	0.673164	2.9353	19.9049	4.45138	0.214552	3.34646	0.751781	4674.47	42.2935	1253.02	75.7697	3086.75	82.6186
2015-09-09	NR1511_3_11		96.2001	1732.74	854.283	2222.05	bdl	5430.74	bdl	0.00486619	-4.14338e-05	0.0158813	3.30256	7.43045	0.621732	2.41185	25.9453	7.81209	0.302795	7.43045	0.951149	4559.62	34.9507	1705.15	218.898	3344.48	142.303
2015-09-09	NR1511_3_12		102.68	2210.08	1230.04	3027.52	bdl	11991.3	bdl	0.00620672	-4.14338e-05	0.0350666	5.42399	3.4374	0.560789	1.98635	14.2491	3.97005	0.184366	3.4374	0.865833	4409.55	29.0103	1090.78	68.6214	2766.43	72.6716
2015-09-09	NR1511_3_13		-156.174	1027.21	226.543	413.957	bdl	14707.9	bdl	0.00288479	-4.14338e-05	0.0430106	14.57	3.02649	0.232296	3.59422	2.19729	4.69873	0.0686342	3.02649	0.644108	3067.93	57.4472	427.922	25.0124	1180.18	63.5456
2015-09-09	NR1511_3_14		-46.7688	2246.79	1496.17	3522.69	bdl	5509.95	bdl	0.00630982	-4.14338e-05	0.0161129	2.30457	4.84328	0.651723	1.60948	38.9744	5.1037	0.433921	4.84328	0.948974	4627.78	23.2437	2323.37	186.245	3744.98	96.3337
2015-09-09	NR1511_3_15		-22.842	2206.95	1500.89	3731.17	bdl	7155.31	bdl	0.00619794	-4.14338e-05	0.0209245	3.26314	3.80068	0.663231	1.55819	28.0114	4.10769	0.306453	3.80068	0.925259	4653.04	22.4749	1723.23	113.929	3419.49	77.5073
2015-09-09	NR1511_3_16		193.284	1456.07	742.248	1586.64	4.51008	11459.4	0.00386628	0.00408918	0.000129563	0.033511	7.5239	9.49419	0.466147	2.62151	8.53858	9.84947	0.13291	9.49419	0.96393	4137.56	38.8726	804.444	142.028	2290.04	164.904
2015-09-09	NR1511_3_17		26.2492	3506.27	1924.52	4722.97	bdl	9733.04	bdl	0.0098469	-4.14338e-05	0.0284626	2.77312	4.28859	0.539398	1.7767	26.807	4.64205	0.360605	4.28859	0.923856	4352.66	26.028	1985.04	144.901	3376.44	87.0396
2015-09-09	NR1511_3_18		24.8808	2254.1	1245.59	3020.19	5.87477	10844.5	0.00532173	0.00633036	0.000168767	0.0317127	4.86479	2.82762	0.547329	1.683	15.5057	3.29058	0.205559	2.82762	0.859307	4374.03	24.6268	1205.11	61.863	2846.83	60.9113
2015-09-09	NR1511_3_19		27.3604	2524.4	1330.2	3183.63	5.70055	11828.8	0.00473418	0.00708946	0.000163762	0.0345914	4.64675	3.18273	0.537608	1.78969	15.9449	3.65141	0.215204	3.18273	0.871645	4347.79	26.2253	1256.48	72.2625	2873.5	67.4825
2015-09-09	NR1511_3_20		46.2667	4506.41	2498.22	6201.85	21.1768	15714.1	0.0132386	0.0126557	0.000608353	0.0459531	3.51407	4.31867	0.548622	1.40492	21.5163	4.54144	0.28457	4.31867	0.950946	4377.48	20.5539	1614.34	122.182	3162.15	84.5133
2015-09-09	NR1511_3_21		252.966	4172.18	2388.6	5795.08	10.7528	11745.9	0.00899302	0.011717	0.0003089	0.0343489	2.61964	8.92911	0.548995	1.78777	28.8824	9.10633	0.381732	8.92911	0.98054	4378.48	26.1536	2084.37	310.45	3449.53	164.64
2015-09-09	NR1511_3_22		108.053	3118.9	1599.11	3859.66	11.0577	13639.8	0.00796393	0.00875903	0.000317659	0.0398872	4.42069	3.06822	0.51624	1.3802	16.0941	3.36436	0.226209	3.06822	0.911978	4288.26	20.291	1314.6	72.566	2882.4	62.3701
2015-09-09	NR1511_3_23		200.642	6219.76	3573.54	8730.99	22.3077	11412.1	0.0192025	0.0174674	0.000640842	0.0333729	1.75375	2.92097	0.576954	1.20888	45.3398	3.16124	0.570208	2.92097	0.923995	4451	17.6167	2908.67	135.327	3895.01	60.9459
2015-09-09	NR1511_3_24		147.739	5025.28	3005.87	7527.07	21.7284	6395.72	0.0333741	0.0141129	0.000624202	0.0187032	1.27845	2.27098	0.592412	1.2115	63.8625	2.57392	0.782197	2.27098	0.882302	4489.5	17.6195	3725.04	127.241	4236.45	50.2027
2015-09-09	NR1511_3_25		147.339	1393.15	673.511	1566.69	10.7528	9432.96	0.0111981	0.0039125	0.0003089	0.0275851	6.86478	2.54547	0.490438	2.90069	9.84608	3.8592	0.145671	2.54547	0.659585	4212.72	42.8262	876.651	41.5937	2420.47	68.7636
2015-09-09	NR1511_3_26		110.255	6034.16	3347.45	8396.02	30.609	9009.94	0.0333732	0.0169462	0.000879317	0.026348	1.43265	3.55858	0.556278	1.00925	53.5128	3.69893	0.698007	3.55858	0.962056	4397.75	14.7493	3413.09	185.895	4059.94	71.1841
2015-09-09	NR1511_3_27		544.808	6905.59	1682.1	3316.01	28828.9	157288	1.80054	0.0193935	0.828179	0.459962	21.3617	3.23745	0.241176	2.6539	1.55598	4.1862	0.0468127	3.23745	0.773363	3127.75	42.2093	294.923	18.6388	952.872	50.4762
2015-09-09	NR1511_3_28		174.424	6786.58	3126.63	6115.86	1079.53	12478.9	0.849827	0.0190592	0.0310121	0.0364922	1.54369	8.70047	0.372881	2.73646	33.2901	9.12066	0.647796	8.70047	0.95393	3803.17	41.4243	3219.59	426.558	3589.23	165.556
2015-09-09	NR1511_3_29		210.864	5051.69	1272.74	2812.03	12014.2	77508.4	1.5227	0.014187	0.345135	0.22666	15.3468	5.62713	0.239327	1.41794	2.14922	5.80303	0.0651604	5.62713	0.969688	3115.5	22.5745	406.932	44.2296	1164.8	77.399
2015-09-09	NR1511_3_30		778.954	70981.1	8019.07	19361.3	17050.5	95491.9	1.75405	0.199341	0.489817	0.279249	1.31243	6.23998	0.117745	3.48562	12.3643	7.14751	0.761944	6.23998	0.873028	1922.27	62.4851	3651.36	338.843	2632.47	126.121
2015-09-09	NR1511_3_31		-3.45589	32715.6	3163.98	7547.77	5945.34	50130.6	1.16505	0.0918777	0.170794	0.146598	1.51094	2.87288	0.0951755	2.17283	8.6813	3.60203	0.66184	2.87288	0.797572	1531.55	40.9095	3274.3	145.85	2305.12	63.5616
2015-09-09	NR1511_3_32		109.57	4129.66	1616.11	3836.37	331.486	28891.4	0.112711	0.0115976	0.00952274	0.084488	6.86392	4.45147	0.382006	2.35352	7.67015	5.03534	0.145689	4.45147	0.884046	3839.72	35.5429	876.754	72.5714	2193.11	86.6567
2015-09-09	NR1511_3_33		315.276	8010.57	3815.57	9150	202.217	17804.7	0.111572	0.0224967	0.00580917	0.0520668	2.26792	4.75518	0.4746	1.19741	28.8407	4.90362	0.440933	4.75518	0.969728	4164.19	17.7281	2354.82	184.927	3448.11	91.9519
2015-09-09	NR1511_3_34		-42.4567	1036.44	205.08	459.079	147.368	16415.7	0.0881889	0.00291072	0.00423349	0.0480048	16.0307	2.70546	0.191481	3.19921	1.64618	4.1898	0.0623803	2.70546	0.645725	2754.92	52.5534	390.085	20.4488	988.088	51.5977
2015-09-09	NR1511_3_35		-45.3161	936.965	225.409	441.658	81.0579	14805.4	0.0537829	0.00263135	0.00232858	0.0432959	15.4999	3.43439	0.232827	3.5864	2.07019	4.96561	0.0645165	3.43439	0.691635	3071.58	57.3048	403.034	26.7802	1139	65.8153
2015-09-09	NR1511_3_36		46.1761	6346.59	2870.46	6884.08	90.0213	12409	0.0712651	0.0178236	0.00258608	0.0362881	1.98121	2.57591	0.451013	1.4541	31.3736	2.95799	0.504742	2.57591	0.87083	4088.55	21.6242	2634.14	110.448	3530.83	56.6067
2015-09-09	NR1511_3_37		134.995	1949.2	732.567	1714.92	83.9237	10209.1	0.0807548	0.00547409	0.00241091	0.0298547	5.20536	3.0355	0.369901	2.21041	9.79356	3.75501	0.19211	3.0355	0.808385	3791.01	33.4875	1132.79	62.7617	2415.54	66.9351
2015-09-09	NR1511_3_38		830.545	37186	11402	28072.6	4688.91	32121.7	1.43398	0.104432	0.1347	0.0939343	0.997248	7.76296	0.292539	3.70737	40.4285	8.6028	1.00276	7.76296	0.902376	3431.16	57.5915	4477.2	482.598	3781.25	157.597
2015-09-09	NR1511_3_39		2288.04	333058	31272.3	76641	19071.9	111012	1.68769	0.935351	0.547887	0.324637	0.327355	2.95779	0.0898656	3.59337	37.8338	4.65412	3.05479	2.95779	0.635521	1422.68	68.6532	9024.32	281.077	3715.58	88.1416
2015-09-09	NR1511_3_40		2649.31	306944	39519.7	97448.2	11695.6	79077.9	1.45291	0.862012	0.335985	0.23125	0.257406	4.2451	0.128171	3.16749	68.6242	5.29659	3.88491	4.2451	0.801479	2073.04	55.7973	10225	421.207	4308.38	100.839
2015-09-09	NR1511_4_01		-36.703	671.883	235.85	538.248	bdl	8239.15	bdl	0.0018869	-4.39705e-05	0.024094	12.2481	3.75485	0.360752	3.9805	4.05924	5.47205	0.081645	3.75485	0.686187	3753.03	60.4557	505.934	36.4383	1646.16	85.4604
2015-09-09	NR1511_4_02		526.761	8258.47	6933.34	17072.2	5.61225	8231.19	0.00669799	0.0231929	0.000161225	0.0240707	1.00819	2.5368	0.836406	1.17546	114.335	2.7959	0.991872	2.5368	0.907328	4985.03	16.6943	4442.06	160.842	4820.88	54.7811
2015-09-09	NR1511_4_03		1219.7	21470.8	18221.9	44640	7.67992	8855.36	0.00851963	0.060298	0.000220624	0.025896	0.402648	2.39394	0.849251	0.721512	290.681	2.50031	2.48356	2.39394	0.957459	5006.66	10.2375	8045.47	216.374	5762.97	49.3809
2015-09-09	NR1511_4_04		882.324	16849.9	14102.3	34359.7	12.7551	9491.34	0.0132016	0.0473208	0.000366421	0.0277558	0.568853	2.90843	0.841019	0.742459	203.756	3.0017	1.75792	2.90843	0.968927	4992.84	10.5411	6539.74	234.69	5403.69	58.917
2015-09-09	NR1511_4_05		503.918	11365.6	9228.8	23807.7	13.1035	8461.65	0.0152126	0.031919	0.00037643	0.0247446	0.73261	6.52714	0.843854	0.98662	158.745	6.60128	1.36498	6.52714	0.988768	4997.62	14.0046	5548.88	468.275	5151.63	125.175
2015-09-09	NR1511_4_06		2246.25	41650.7	34469.3	84440.7	32.6158	13048.8	0.0245543	0.116971	0.000936965	0.0381589	0.321899	3.30083	0.851571	0.754066	364.591	3.38587	3.10656	3.30083	0.974885	5010.53	10.6976	9106.11	314.158	5992.3	66.3548
2015-09-09	NR1511_4_07		405.293	6031.21	5154.89	12094.1	10.9694	8735.9	0.0123352	0.0169379	0.000315122	0.0255466	1.50448	6.36497	0.796616	1.74208	72.9742	6.59906	0.664683	6.36497	0.964526	4915.7	24.8182	3285.32	319.608	4369.92	124.275
2015-09-09	NR1511_4_08		640.444	9225.41	8205.78	20353.5	24.0792	9443.52	0.0250483	0.0259084	0.000691732	0.027616	1.15839	19.2341	0.706939	3.34663	84.1074	19.5231	0.86327	19.2341	0.985198	4744.89	48.0566	4011.82	1057.28	4512.27	331.351
2015-09-09	NR1511_4_09		204.418	4577.41	3463.79	8731.17	8.22549	9888.81	0.00817124	0.0128551	0.000236297	0.0289181	2.14878	3.89366	0.782735	1.61367	50.2029	4.2148	0.46538	3.89366	0.923807	4890.64	23.015	2463.27	157.488	3996.34	80.633
2015-09-09	NR1511_4_10		347.645	6136	5077.19	12367.1	6.80273	9950.17	0.00671618	0.0172322	0.000195425	0.0290976	1.57618	3.20137	0.816367	1.27519	71.3816	3.446	0.634447	3.20137	0.929012	4950.56	18.1384	3167.15	158.259	4347.82	66.7691
2015-09-09	NR1511_4_11		919.173	19812	16898.7	40814.7	23.4694	11259.1	0.0204772	0.0556394	0.000674215	0.0329252	0.566199	1.82752	0.838099	0.832399	204.001	2.00817	1.76616	1.82752	0.910046	4987.9	11.8206	6558.98	148.712	5404.9	39.7922
2015-09-09	NR1511_4_12		1092.25	19207	15947.8	39481.1	20.4206	12223.3	0.0164116	0.0539404	0.000586631	0.035745	0.645677	7.84956	0.825408	0.795883	176.181	7.88981	1.54876	7.84956	0.994899	4966.22	11.3128	6031.31	587.372	5256.81	147.991
2015-09-09	NR1511_4_13		8.23221	889.556	425.762	1009.25	7.00598	8748.75	0.0078667	0.0024982	0.000201263	0.0255842	9.9114	2.74315	0.493537	3.39079	6.86264	4.36146	0.100894	2.74315	0.628953	4222.02	50.0358	619.645	32.3317	2093.84	74.5047
2015-09-09	NR1511_4_14		1094.92	20450.8	17369.5	43238	14.2589	9863.64	0.014201	0.0574333	0.00040962	0.0288445	0.467833	5.25762	0.844066	0.629714	248.652	5.29519	2.13751	5.25762	0.992904	4997.97	8.93835	7371.03	446.015	5604.98	101.822
2015-09-09	NR1511_4_15		100.717	886.522	457.732	984.687	9.44501	8475.75	0.010947	0.00248968	0.00027133	0.0247859	9.38524	3.09379	0.524464	3.49248	7.70151	4.66572	0.10655	3.09379	0.663089	4311.48	51.2791	652.682	38.294	2196.78	80.5775
2015-09-09	NR1511_4_16		72.7923	729.463	256.342	600.154	22.2194	8536.8	0.0255686	0.0020486	0.000638306	0.0249644	11.5702	3.2736	0.361262	3.7521	4.30318	4.97943	0.0864293	3.2736	0.657424	3755.17	56.9787	534.385	33.4891	1693.97	78.9058
2015-09-09	NR1511_4_17		773.803	16025.5	13696	33644	232.618	9804.3	0.233076	0.0450057	0.00668251	0.028671	0.589743	6.95725	0.850737	0.870844	198.81	7.01154	1.69565	6.95725	0.992257	5009.15	12.355	6392.53	540.893	5378.86	132.624
2015-09-09	NR1511_4_18		454.283	7907.17	6125.6	15006.3	39.9329	11108.7	0.0353131	0.0222063	0.00114717	0.0324856	1.39267	4.60088	0.797944	1.05262	78.9642	4.71976	0.718045	4.60088	0.974813	4918.07	14.9945	3488.72	243.268	4448.98	90.4936
2015-09-09	NR1511_4_19		-57.4872	892.056	390.064	929.924	24.0792	9250.14	0.0255719	0.00250523	0.000691732	0.0270504	10.361	2.99275	0.441724	3.08003	5.87564	4.29454	0.0965159	2.99275	0.696872	4057.57	45.8884	593.958	33.8736	1957.64	71.9197
2015-09-09	NR1511_4_20		165.147	1857.9	978.171	2352.01	17.074	14267.6	0.0117559	0.00521769	0.000490493	0.0417232	7.68757	2.20819	0.536514	2.09193	9.6183	3.04176	0.13008	2.20819	0.725958	4344.81	30.6592	788.323	32.6877	2398.92	54.4663
2015-09-09	NR1511_4_21		178.479	1453.62	692.283	1572.81	27.7377	13706.5	0.0198799	0.00408229	0.000796832	0.0400823	9.35991	3.5819	0.468164	2.71892	6.89339	4.49695	0.106839	3.5819	0.796518	4143.97	40.302	654.362	44.4231	2097.81	76.7759
2015-09-09	NR1511_4_22		3886.96	71209.2	58250.3	141252	2553.37	12341.9	2.03238	0.199982	0.0733517	0.0360916	0.17417	7.33461	0.852532	0.81858	674.596	7.38014	5.74152	7.33461	0.99383	5012.13	11.612	12301.6	758.892	6615.82	139.6
2015-09-09	NR1511_4_23		7497.34	143990	124025	303674	1473.52	11462.8	1.2628	0.404378	0.0423304	0.0335211	0.0844813	8.09764	0.859476	0.941514	1402.1	8.15219	11.8369	8.09764	0.993308	5023.64	13.3491	16453.4	897.244	7357.91	153.263
2015-09-09	NR1511_4_24		1220.51	23001.4	19271.4	47052.2	447.129	12547.1	0.350074	0.0645965	0.0128449	0.0366919	0.619854	12.9904	0.821685	0.940684	182.693	13.0244	1.61328	12.9904	0.997388	4959.8	13.3749	6192.47	958.94	5293.46	233.917
2015-09-09	NR1511_4_25		14175.6	265234	227774	543624	6818.98	14249.1	4.70112	0.744875	0.195891	0.0416691	0.0574129	7.28158	0.852067	0.667444	2045.36	7.31211	17.4177	7.28158	0.995825	5011.36	9.46835	18780.4	831.782	7741.1	138.525
2015-09-09	NR1511_4_26		1266.08	24915.9	21501.7	52136	646.04	9477.55	0.669628	0.0699732	0.0185591	0.0277155	0.447333	11.0525	0.855633	0.75615	263.61	11.0783	2.23547	11.0525	0.997668	5017.28	10.724	7569.22	916.243	5664.07	202.516
2015-09-09	NR1511_4_27		613.24	11478.5	9511.53	23539.3	11.2899	9292.25	0.0119355	0.0322359	0.00032433	0.0271736	0.763424	4.6226	0.816457	0.888607	147.392	4.70723	1.30989	4.6226	0.98202	4950.72	12.6396	5396.93	329.408	5076.77	90.7681
2015-09-09	NR1511_4_28		168.335	3780.28	3316.66	7121.96	14.2589	8733.43	0.0160387	0.0106164	0.00040962	0.0255394	2.28854	22.9715	0.524072	6.76242	31.5601	23.9462	0.436961	22.9715	0.959297	4310.38	99.2965	2337.02	843.004	3536.67	387.185
2015-09-09	NR1511_4_29		1379.64	24134.3	20582.1	50787	30.9694	9240.46	0.0329238	0.067778	0.00088967	0.0270221	0.395055	5.28411	0.845746	0.874949	295.045	5.35606	2.53129	5.28411	0.986567	5000.8	12.4178	8133.21	470.734	5778.05	102.997
2015-09-09	NR1511_4_30		-9.21576	1445.69	871.962	2168.08	6.5775	7487.26	0.00862994	0.00406003	0.000188954	0.0218952	5.30374	3.64627	0.612721	2.30625	15.9216	4.3144	0.188546	3.64627	0.845139	4538.46	33.4564	1113.5	74.1479	2872.1	79.2619
2015-09-09	NR1511_4_31		545.921	10670.7	8892.93	21955.7	6.80273	8007.87	0.00834518	0.0299672	0.000195425	0.0234176	0.757564	4.41765	0.829682	0.923953	150.938	4.51324	1.32002	4.41765	0.97882	4973.56	13.129	5425.15	316.18	5100.75	87.1966
2015-09-09	NR1511_4_32		474.127	6368.39	5208.06	12740.3	bdl	8365.33	bdl	0.0178848	-4.39705e-05	0.024463	1.24025	6.90067	0.79128	1.19976	87.9281	7.00419	0.806291	6.90067	0.98522	4906.12	17.0996	3811.61	385.387	4556.86	131.715
2015-09-09	NR1511_4_33		1435.59	27572.5	24022.8	58153.9	8.22549	7980.95	0.0101246	0.0774338	0.000236297	0.0233389	0.291173	4.99836	0.842804	0.855183	398.915	5.07099	3.43438	4.99836	0.985677	4995.85	12.1399	9601.21	480.725	6083.42	97.8522
2015-09-09	NR1511_4_34		134.381	3643.35	2684.46	6609.16	5.78646	8209.75	0.00692394	0.0102319	0.00016623	0.024008	2.24777	2.87021	0.740181	1.55203	45.3828	3.26296	0.444885	2.87021	0.879634	4810.77	22.2175	2372.47	112.945	3895.95	62.8487
2015-09-09	NR1511_4_35		100.947	637.675	289.769	681.287	10.9694	7041.21	0.015304	0.00179083	0.000315122	0.0205908	10.5539	3.397	0.460985	3.74226	6.01978	5.05412	0.0947518	3.397	0.672126	4121.04	55.5451	583.579	37.7957	1978.71	84.4085
2015-09-09	NR1511_4_36		-65.0712	518.222	140.406	316.816	7.9932	7335.04	0.010705	0.00145536	0.000229624	0.02145	14.0713	4.58125	0.282184	5.63713	2.76377	7.26395	0.0710664	4.58125	0.630682	3375.05	87.9359	442.577	39.0718	1345.81	102.924
2015-09-09	NR1511_4_37		383.103	7042.8	5788.56	14253.8	15.9113	7683.4	0.0203433	0.0197788	0.000457089	0.0224688	1.08752	2.23	0.819832	1.28122	103.895	2.57185	0.919523	2.23	0.867079	4956.59	18.2193	4203.56	136.277	4724.53	50.4557
2015-09-09	NR1511_4_38		199.193	4871.93	3902.91	9310.55	bdl	6565.4	bdl	0.0136822	-4.39705e-05	0.0191994	1.35908	1.90937	0.81926	1.21942	83.0773	2.26554	0.735792	1.90937	0.842788	4955.59	17.3412	3554.96	103.515	4499.91	44.4723
2015-09-09	NR1511_4_39		583.314	11257.4	9589.79	23793.6	4.56695	7212.31	0.00622045	0.0316149	0.000131197	0.0210912	0.610462	4.36853	0.842531	0.831287	190.21	4.44692	1.6381	4.36853	0.982372	4995.39	11.8009	6253.41	340.573	5334.19	86.0802
2015-09-09	NR1511_4_40		282.886	5790.1	4599.6	11448.7	4.42177	7904.62	0.00549523	0.0162608	0.000127026	0.0231157	1.3318	4.28599	0.788326	1.3197	81.5778	4.48457	0.750862	4.28599	0.95572	4900.79	18.8136	3610.69	232.726	4481.64	86.2032
2015-09-09	NR1511_4_41		553.564	8699.07	7249.67	17381	bdl	7509.52	bdl	0.0244302	-4.39705e-05	0.0219603	0.873247	2.56012	0.838607	0.989468	132.351	2.74467	1.14515	2.56012	0.932757	4988.76	14.0505	4919.97	173.838	4968.25	53.8656
2015-09-09	NR1511_4_42		506.995	10289.1	8635.89	20315	15.5426	3377.81	0.045202	0.0288956	0.000446498	0.00987782	0.349605	3.96362	0.834042	1.09396	328.788	4.11182	2.86037	3.96362	0.963958	4981.01	15.5397	8707.58	367.943	5887.65	80.0113
2015-09-09	NR1511_4_43		70.4204	1219.92	730.504	1708.66	bdl	7858.06	bdl	0.00342599	-4.39705e-05	0.0229796	6.04399	6.30642	0.598868	2.73456	13.6557	6.87377	0.165454	6.30642	0.917461	4505.25	39.7376	987.014	114.407	2726.13	122.385
2015-09-09	NR1511_4_44		533.26	7687.01	6408.47	15472.9	11.5646	9168.16	0.0123914	0.021588	0.000332222	0.0268107	1.20255	1.6054	0.828628	1.08253	94.9651	1.93628	0.831569	1.6054	0.829115	4971.76	15.3835	3901.2	93.2953	4634.19	38.1845
2015-09-09	NR1511_4_45		10.126	701.152	199.768	404.36	bdl	10071	bdl	0.0019691	-4.39705e-05	0.029451	14.8791	3.79709	0.297327	4.81854	2.75399	6.13484	0.0672083	3.79709	0.618939	3456.35	74.7143	419.314	30.7565	1343.17	87.5149
2015-09-09	NR1511_4_46		-50.073	671.273	256.992	618.785	bdl	7152.56	bdl	0.00188519	-4.39705e-05	0.0209164	10.8051	3.60461	0.389039	4.55523	4.96217	5.8089	0.0925492	3.60461	0.620532	3867.25	68.6718	570.596	39.2478	1812.9	93.7183
2015-09-09	NR1511_4_47		494.35	10101	8292.11	20165.2	bdl	10749.1	bdl	0.0283674	-4.39705e-05	0.031434	1.08977	2.31392	0.812133	1.01141	102.706	2.52531	0.917621	2.31392	0.916292	4943.17	14.3912	4197.16	141.199	4712.96	49.5592
2015-09-09	NR1511_4_48		-27.8985	1037.81	313.436	710.871	4.56695	13359.9	0.00335811	0.00291454	0.000131197	0.0390686	12.8666	3.20533	0.312981	4.11275	3.35243	5.2143	0.0777206	3.20533	0.61472	3535.68	63.4059	482.503	29.7337	1493.36	78.451
2015-09-09	NR1511_4_49		-51.9626	756.457	153.902	370.214	9.7194	11806.7	0.0080869	0.00212441	0.000279213	0.0345265	15.6906	2.97575	0.207109	4.44218	1.81913	5.34677	0.0637323	2.97575	0.55655	2883.06	72.134	398.284	22.9455	1052.37	67.7533
2015-09-09	NR1511_4_50		648.508	12886.3	10787.2	26850	7.67992	9124.46	0.00826837	0.0361896	0.000220624	0.0266829	0.697767	2.67014	0.832978	0.804141	164.524	2.7886	1.43314	2.67014	0.95752	4979.2	11.4237	5732.05	199.646	5187.71	54.783
2015-09-09	NR1511_5_01		269.066	3364.63	2108.08	5290.41	bdl	4555.46	bdl	0.00944914	-4.22462e-05	0.0133217	1.34302	2.48251	0.619751	1.68968	63.5976	3.00297	0.74459	2.48251	0.826683	4555	24.4912	3587.56	135.176	4232.3	58.3312
2015-09-09	NR1511_5_02		458.464	11301.8	7684.41	18535.8	5.84649	7334.55	0.00783054	0.0317395	0.000167954	0.0214486	0.639533	2.59177	0.66571	0.93686	143.459	2.7559	1.56364	2.59177	0.940445	4658.42	13.5095	6068.84	200.654	5049.5	54.1107
2015-09-09	NR1511_5_03		-57.9082	485.18	113.26	224.319	5.84649	7478.87	0.00767943	0.00136256	0.000167954	0.0218707	15.1098	3.34434	0.236425	5.97946	2.15646	6.85117	0.0661824	3.34434	0.488141	3096.06	95.3486	413.115	26.7097	1167.13	90.8634
2015-09-09	NR1511_5_04		-2.15289	523.595	169.106	408.592	8.05323	7166.9	0.0110385	0.00147045	0.000231348	0.0209584	13.7061	3.3075	0.315221	4.024	3.16963	5.20885	0.0729603	3.3075	0.634977	3546.68	61.989	453.966	28.9318	1449.79	77.3852
2015-09-09	NR1511_5_05		23.73	830.449	258.738	700.065	4.4818	10871.6	0.00404977	0.00233221	0.00012875	0.031792	13.3915	3.84481	0.333778	6.6101	3.43505	7.64696	0.0746741	3.84481	0.502789	3634.52	101.203	464.254	34.3525	1512.45	113.67
2015-09-09	NR1511_5_06		30.9321	638.275	188.439	445.178	bdl	7518.44	bdl	0.00179251	-4.22462e-05	0.0219864	12.0062	3.57098	0.303802	4.27536	3.48733	5.57051	0.0832905	3.57098	0.64105	3489.72	66.131	515.734	35.3017	1524.35	84.3148
2015-09-09	NR1511_5_07		586.453	8423.55	5614.12	14027.7	bdl	8542.96	bdl	0.0236565	-4.22462e-05	0.0249824	1.00692	4.0648	0.682162	1.20196	93.3683	4.23878	0.99313	4.0648	0.958954	4693.59	17.3024	4446.13	255.98	4617.16	81.7838
2015-09-09	NR1511_5_08		217.889	3621.91	2522.18	6117.05	4.4818	6871.96	0.0064068	0.0101717	0.00012875	0.0200959	1.77499	17.3121	0.546734	4.5256	42.4509	17.8938	0.563384	17.3121	0.967489	4372.44	66.2273	2880.6	757.974	3829.65	304.451
2015-09-09	NR1511_5_09		71.4758	626.645	265.472	579.388	bdl	5940.94	bdl	0.00175985	-4.22462e-05	0.0173733	9.61352	4.06625	0.426437	4.37869	6.11334	5.97556	0.10402	4.06625	0.68048	4005.02	65.4447	637.926	49.2067	1992.15	99.275
2015-09-09	NR1511_5_10		86.5082	728.812	239.114	535.861	5.84649	9187.63	0.00625117	0.00204678	0.000167954	0.0268677	12.5734	2.86366	0.324895	3.4012	3.5612	4.4462	0.079533	2.86366	0.644069	3593.16	52.2234	493.335	27.1436	1540.93	68.1568
2015-09-09	NR1511_5_11		-51.5241	820.422	329.107	780.465	bdl	8907.83	bdl	0.00230405	-4.22462e-05	0.0260494	10.7186	3.9855	0.409206	3.81512	5.26153	5.51718	0.0932962	3.9855	0.722379	3943.25	57.239	575.002	43.7002	1862.64	90.0351
2015-09-09	NR1511_5_12		76.1181	3989.15	2485.12	5870.31	bdl	6714.96	bdl	0.011203	-4.22462e-05	0.0196367	1.76562	3.12616	0.618862	1.65618	48.3063	3.53777	0.566375	3.12616	0.883653	4552.92	24.0083	2892.92	144.113	3958.01	68.0543
2015-09-09	NR1511_5_13		47.4543	2503.85	1485.98	3675.88	3.40746	6015.69	0.00556436	0.00703175	9.78875e-05	0.0175919	2.38816	6.17897	0.588126	2.24761	33.94	6.57506	0.418732	6.17897	0.939759	4478.94	32.706	2254.72	230.939	3608.3	122.063
2015-09-09	NR1511_5_14		170.035	1563.87	934.452	2231.84	5.67227	3753	0.0148473	0.00439194	0.00016295	0.010975	2.36855	3.68446	0.581176	2.13518	33.8166	4.25843	0.422199	3.68446	0.865216	4461.63	31.0981	2270.45	139.499	3604.71	80.7012
2015-09-09	NR1511_5_15		-4.18826	4021.4	2694.22	6316.26	12.4829	4906.99	0.0249903	0.0112936	0.000358601	0.0143496	1.20366	3.55255	0.675029	1.67031	77.2905	3.92562	0.830803	3.55255	0.904964	4678.46	24.0621	3898.5	204.567	4427.5	75.8008
2015-09-09	NR1511_5_16		225.503	4713.57	2859.24	7045.15	8.05323	8001.29	0.00988735	0.0132374	0.000231348	0.0233984	1.62553	3.65045	0.604577	1.41308	51.2581	3.91441	0.615184	3.65045	0.932568	4519.04	20.5198	3090.73	176.811	4017.05	75.1226
2015-09-09	NR1511_5_17		222.379	2106.59	1124.08	2718.03	bdl	7533.99	bdl	0.00591609	-4.22462e-05	0.0220319	3.62648	4.32138	0.556781	2.59922	21.1595	5.04284	0.275749	4.32138	0.856933	4399.07	37.9825	1569.92	119.315	3145.93	93.3603
2015-09-09	NR1511_5_18		53.4638	518.034	216.513	466.629	bdl	5227.54	bdl	0.00145483	-4.22462e-05	0.015287	10.4306	2.98888	0.414612	3.43199	5.47822	4.55104	0.0958719	2.98888	0.656747	3962.93	51.428	590.171	33.6245	1897.19	75.2927
2015-09-09	NR1511_5_19		25.0916	801.939	380.579	863.799	5.67227	5753.77	0.00968445	0.00225214	0.00016295	0.0168259	7.18176	3.21102	0.467213	3.83339	8.96582	5.00055	0.139242	3.21102	0.642133	4140.95	56.8315	840.373	50.4017	2334.53	87.4807
2015-09-09	NR1511_5_20		-85.0974	493.034	191.634	393.551	bdl	6036.67	bdl	0.00138462	-4.22462e-05	0.0176532	12.0402	3.92388	0.389493	4.32758	4.45831	5.84164	0.0830549	3.92388	0.671708	3869	65.2324	514.331	38.679	1723.25	92.5474
2015-09-09	NR1511_5_21		-50.3836	446.764	126.939	279.264	bdl	6556.77	bdl	0.00125468	-4.22462e-05	0.0191742	14.4045	3.96493	0.294464	4.99944	2.81735	6.38084	0.0694229	3.96493	0.621381	3441.34	77.6047	432.678	33.0995	1360.16	91.3954
2015-09-09	NR1511_5_22		-37.3411	588.84	194.606	406.153	bdl	7714.58	bdl	0.00165368	-4.22462e-05	0.02256	12.7985	3.52287	0.354372	5.03739	3.816	6.14703	0.0781344	3.52287	0.573101	3725.9	76.6462	484.978	32.8328	1596.12	94.3855
2015-09-09	NR1511_5_23		-25.3429	721.457	332.44	787.607	bdl	5539.09	bdl	0.00202612	-4.22462e-05	0.0161981	7.71194	3.1314	0.476187	3.92006	8.5098	5.01723	0.129669	3.1314	0.62413	4169.13	58.0215	785.977	46.1759	2286.97	87.3104
2015-09-09	NR1511_5_24		47.9076	3451.49	2343.11	6056.94	bdl	7393.27	bdl	0.00969307	-4.22462e-05	0.0216203	2.10233	2.11141	0.674952	1.70074	44.2464	2.71119	0.475663	2.11141	0.778776	4678.29	24.5007	2508.35	87.1555	3870.77	52.4622
2015-09-09	NR1511_5_25		13.6479	407.13	83.4738	171.754	bdl	5563.09	bdl	0.00114337	-4.22462e-05	0.0162683	14.6782	3.62716	0.222045	5.78593	2.08484	6.82886	0.0681282	3.62716	0.531152	2995.58	93.0425	424.869	29.7588	1143.83	89.647
2015-09-09	NR1511_5_26		-73.5778	492.384	137.325	298.835	bdl	6815.83	bdl	0.0013828	-4.22462e-05	0.0199317	14.5846	4.68129	0.292353	4.98918	2.76261	6.84152	0.0685655	4.68129	0.684247	3430.17	77.5092	427.507	38.6115	1345.5	97.2051
2015-09-09	NR1511_5_27		31.5573	1132.57	689.69	1703.76	bdl	6346.26	bdl	0.00318069	-4.22462e-05	0.0185586	5.58094	2.94064	0.591811	2.70728	14.6144	3.99709	0.179181	2.94064	0.735695	4488.02	39.3764	1062.5	57.3546	2790.47	73.2651
2015-09-09	NR1511_5_28		23.7884	488.272	118.562	262.781	bdl	7393.05	bdl	0.00137125	-4.22462e-05	0.0216197	15.7031	4.41108	0.28546	5.878	2.50533	7.34905	0.0636816	4.41108	0.600224	3393.05	91.5698	397.976	33.9586	1273.58	101.427
2015-09-09	NR1511_5_29		-86.0583	550.956	220.868	485.423	bdl	6727.28	bdl	0.00154729	-4.22462e-05	0.0196728	12.005	3.42718	0.389522	3.57757	4.47173	4.95425	0.0832985	3.42718	0.691766	3869.12	53.9268	515.781	33.8869	1725.74	79.0625
2015-09-09	NR1511_5_30		-98.9282	738.188	426.759	1132.86	bdl	5705.19	bdl	0.00207311	-4.22462e-05	0.0166838	7.65436	4.13475	0.572022	3.02917	10.2993	5.12563	0.130644	4.13475	0.806683	4438.49	44.1726	791.541	61.305	2462.04	90.7029
2015-09-09	NR1511_5_31		86.9763	372.794	117.325	243.55	4.62698	5049.01	0.00900246	0.00104694	0.000132921	0.014765	13.6991	3.92192	0.331373	5.34174	3.33373	6.62689	0.0729974	3.92192	0.591819	3623.45	81.8465	454.189	34.3083	1488.99	98.5793
2015-09-09	NR1511_5_32		-35.0524	920.555	505.443	1225.69	bdl	6316.24	bdl	0.00258526	-4.22462e-05	0.0184708	6.72752	3.31736	0.538994	3.36418	11.0417	4.72467	0.148643	3.31736	0.702135	4351.56	49.2869	893.354	55.1115	2526.65	84.3744
2015-09-09	NR1511_5_33		74.1762	299.202	100.233	236.639	5.67227	3429.79	0.0162465	0.000840269	0.00016295	0.0100298	11.3659	5.07903	0.335095	6.16048	4.06321	7.98424	0.0879822	5.07903	0.636132	3640.55	94.2797	543.593	52.7381	1646.95	122.431
2015-09-09	NR1511_5_34		-39.5382	260.055	102.04	242.737	bdl	2931.86	bdl	0.000730331	-4.22462e-05	0.00857373	10.9096	5.98704	0.387292	6.36251	4.89256	8.73649	0.0916624	5.98704	0.685292	3860.46	95.9588	565.362	64.4896	1800.97	137.556
2015-09-09	NR1511_5_35		95.0701	1344.25	930.509	2334.28	bdl	2981.97	bdl	0.00377515	-4.22462e-05	0.00872027	2.21692	3.93797	0.696216	2.65103	43.2813	4.74716	0.451077	3.93797	0.829542	4722.93	38.108	2400.04	155.926	3848.87	90.1076
2015-09-09	NR1511_5_36		-47.7674	453.152	190.939	501.887	bdl	4257.37	bdl	0.00127262	-4.22462e-05	0.01245	9.38102	4.32272	0.455926	4.35241	6.69807	6.13428	0.106598	4.32272	0.704682	4104.65	64.6639	652.961	53.4642	2072.37	102.987
2015-09-09	NR1511_5_37		88.7049	2266.97	1721.44	4181.95	4.4818	3588.42	0.0122693	0.00636649	0.00012875	0.0104937	1.54701	4.85668	0.768056	1.86689	68.4237	5.20314	0.64641	4.85668	0.933414	4863.62	26.6594	3214.16	241.271	4305.46	99.1401
2015-09-09	NR1511_5_38		88.8875	3360.35	1969.09	4878.47	369.048	5703.09	0.635685	0.00943712	0.0106018	0.0166777	1.51533	6.28598	0.597401	2.61064	54.3332	6.80654	0.659923	6.28598	0.923521	4501.69	37.9438	3266.86	314.407	4075.11	127.391
2015-09-09	NR1511_5_39		414.729	9676.6	4844.09	11265.8	8603.25	52264.5	1.61706	0.0271755	0.247149	0.152839	5.16997	5.50599	0.485317	2.68206	12.9373	6.12449	0.193425	5.50599	0.899012	4197.22	39.6335	1139.9	114.039	2675.1	109.345
2015-09-09	NR1511_5_40		-78.061	426.932	260.106	574.449	bdl	3101.15	bdl	0.00119898	-4.22462e-05	0.00906877	7.13968	4.67642	0.600434	3.65061	11.5902	5.93261	0.140062	4.67642	0.788256	4509.05	53.0389	845.015	73.6497	2571.89	105.259
2015-09-09	NR1511_5_41		6.27483	686.403	424.228	1051.29	bdl	3304.86	bdl	0.00192767	-4.22462e-05	0.0096645	4.74688	4.43427	0.636284	2.84023	18.4735	5.2659	0.210665	4.43427	0.842073	4593.12	41.089	1232.36	98.7207	3014.73	96.6929
2015-09-09	NR1511_5_42		215.714	478.153	233.628	544.744	8.28552	4481.19	0.0181634	0.00134283	0.000238021	0.0131045	9.31437	3.92763	0.515279	5.62762	7.62422	6.86268	0.107361	3.92763	0.572318	4285.52	82.7474	657.403	48.9089	2187.72	116.285
2015-09-09	NR1511_5_43		110.589	1126.66	749.533	1909.44	bdl	3557.27	bdl	0.00316408	-4.22462e-05	0.0104026	3.15354	4.80521	0.700521	2.55929	30.6146	5.44427	0.317104	4.80521	0.882619	4731.79	36.7737	1775.57	147.457	3506.75	101.787
2015-09-09	NR1511_5_44		190.032	1628.56	1284.59	3275.85	bdl	2400.5	bdl	0.0045736	-4.22462e-05	0.00701984	1.29083	6.65552	0.799456	2.18582	85.3554	7.00527	0.774694	6.65552	0.950074	4920.77	31.1329	3697.85	364.095	4527.06	131.692
2015-09-09	NR1511_5_45		87.4215	760.688	570.111	1426.91	bdl	2621.11	bdl	0.0021363	-4.22462e-05	0.00766497	3.46973	4.24561	0.749823	3.76074	29.7831	5.67171	0.288207	4.24561	0.748558	4829.29	53.789	1632.56	121.315	3479.68	105.736
2016-08-11	NIST614_01		1802.9	32712	28319.4	69409.3	43288.4	55853.2	1.32066	0.309575	0.582404	0.440996	1.37085	0.572696	0.863523	0.439195	86.814	0.721715	0.729474	0.572696	0.79352	5030.3	6.22528	3531.46	31.0685	4544.06	14.387
2016-08-11	NIST614_02		1738.87	33441.9	29276.8	71382.5	45814.7	59051.6	1.32202	0.316482	0.616392	0.466249	1.39901	0.545841	0.870576	0.445691	85.7613	0.704686	0.71479	0.545841	0.774588	5041.83	6.31419	3476.49	29.2682	4531.82	14.048
2016-08-11	NIST614_03		1827.73	34440.7	30510.3	73703.3	46649.5	60910.2	1.30504	0.325934	0.627623	0.480924	1.40945	0.602611	0.880459	0.414358	86.0925	0.731323	0.709497	0.602611	0.824002	5057.81	5.86624	3456.56	32.165	4535.69	14.5758
2016-08-11	NIST614_04		2030.21	37253.7	32616.3	79136	49053.2	64715	1.2916	0.352556	0.659963	0.510965	1.38095	0.472137	0.865578	0.377914	86.3841	0.604758	0.724139	0.472137	0.780704	5033.67	5.35588	3511.54	25.5156	4539.08	12.0687
2016-08-11	NIST614_05		2600.62	46660.3	40563.4	98891.9	54496.2	83145.5	1.11685	0.441576	0.733193	0.656485	1.42815	0.421241	0.863489	0.376629	83.3274	0.565061	0.700205	0.421241	0.74548	5030.24	5.33846	3421.43	22.3281	4502.93	11.2761
2016-08-11	NIST614_06		2705.98	50454.5	44323	107039	59068.3	90793	1.10858	0.477483	0.794706	0.716867	1.43945	0.401458	0.871689	0.37422	83.4585	0.548825	0.69471	0.401458	0.731486	5043.64	5.30124	3400.56	21.1828	4504.5	10.9541
2016-08-11	NIST614_07		2860.34	49846.2	43958	106621	60356.3	90651.7	1.13452	0.471727	0.812035	0.715751	1.45517	0.450591	0.882845	0.3558	83.6134	0.574131	0.687204	0.450591	0.784823	5061.64	5.03639	3371.94	23.6185	4506.36	11.4566
2016-08-11	NIST614_08		2863.38	50804.7	44756.7	108621	63318.1	92147	1.17088	0.480797	0.851883	0.727558	1.45254	0.383355	0.869145	0.357661	82.4652	0.524293	0.688451	0.383355	0.731186	5039.49	5.06757	3376.7	20.1213	4492.49	10.4655
2016-08-11	NIST614_09		2360.83	42922.8	37673.2	90637.4	54565.3	80739.1	1.15159	0.406206	0.734123	0.637485	1.50218	0.386803	0.873603	0.377456	80.1488	0.540453	0.665697	0.386803	0.715702	5046.74	5.34636	3289.24	19.8998	4463.91	10.7826
2016-08-11	NIST614_10		2518.13	44971.3	39827.2	96424.1	56773.4	82874	1.16733	0.425592	0.763831	0.654342	1.4617	0.408662	0.875225	0.367609	82.5216	0.549674	0.684135	0.408662	0.743463	5049.37	5.2063	3360.21	21.3677	4493.18	10.9695
2016-08-11	NIST614_11		2575.78	46301.2	40573.2	98626.5	58557.2	84304.3	1.18358	0.438178	0.787829	0.665635	1.45454	0.447483	0.868791	0.390789	82.3184	0.594102	0.687505	0.447483	0.75321	5038.92	5.53708	3373.09	23.462	4490.7	11.8506
2016-08-11	NIST614_12		2453.75	45653.5	39635	96528.2	58632	84839.2	1.17762	0.432048	0.788837	0.669858	1.48415	0.349527	0.867387	0.346173	80.5454	0.491939	0.673786	0.349527	0.710507	5036.63	4.90541	3320.47	18.1151	4468.86	9.81999
2016-08-11	WC1_01		30.0582	15355.6	1217.52	1100.39	116.4	461378	0.000429896	0.14532	0.00156605	3.64287	24.0384	0.555925	0.0789637	1.68221	0.452718	1.77169	0.0416001	0.555925	0.313782	1171.23	33.3015	262.744	2.86195	379.181	11.1509
2016-08-11	WC1_02		75.7974	19977.4	1988.95	2426.73	518.572	586178	0.00150746	0.189059	0.00697688	4.62824	23.5356	0.720165	0.0964141	2.09761	0.564574	2.21779	0.0424887	0.720165	0.324721	1555.86	39.3666	268.241	3.78316	454.499	16.1233
2016-08-11	WC1_03		45.5789	20393.3	1988.35	2431.93	255.368	598869	0.000726608	0.192995	0.00343572	4.72845	23.6058	0.812838	0.098703	2.98583	0.57626	3.09449	0.0423625	0.812838	0.262673	1599.76	55.715	267.46	4.25767	462.055	22.7181
2016-08-11	WC1_04		31.5955	17086.2	1138.14	610.67	148.432	524270	0.000482434	0.161698	0.001997	4.13944	24.8623	0.529004	0.064763	1.3752	0.358997	1.47343	0.0402215	0.529004	0.359028	766.645	28.9691	254.206	2.63664	311.466	7.87369
2016-08-11	WC1_05		-45.3949	17641.8	1329.38	1150.39	192.071	538454	0.000607824	0.166956	0.00258412	4.25143	24.3843	0.612239	0.0751815	1.5776	0.42492	1.69224	0.04101	0.612239	0.361792	1073.36	31.6855	259.091	3.10885	359.563	10.1966
2016-08-11	WC1_06		175.255	18186.7	2097.54	3282.02	472.987	519524	0.00155135	0.172112	0.00636358	4.10197	23.1352	0.819683	0.113582	2.6699	0.676617	2.79289	0.0432241	0.819683	0.293489	1857.5	48.2348	272.787	4.37719	524.728	22.6347
2016-08-11	WC1_07		40.0599	23053.1	1782.9	1524.24	539.061	690590	0.0013301	0.218166	0.00725254	5.45264	23.911	0.525958	0.0764918	1.39342	0.440883	1.48938	0.0418218	0.525958	0.353139	1107.97	27.8423	264.116	2.72155	370.875	9.21272
2016-08-11	WC1_08		78.7159	20430.5	2247.3	3132.84	492.659	592747	0.00141626	0.193347	0.00662825	4.6801	23.2463	0.545534	0.109492	1.27396	0.649133	1.38585	0.0430175	0.545534	0.393646	1790.98	23.2031	271.51	2.90019	507.945	11.0178
2016-08-11	WC1_09		50.4821	39949	2745.6	1767.42	1900.06	1215895	0.0026628	0.378063	0.0255635	9.60024	24.4755	0.514434	0.0676033	1.55208	0.380664	1.63512	0.0408572	0.514434	0.314616	856.415	32.2303	258.144	2.60296	327.527	9.11407
2016-08-11	WC1_10		46.3611	23854.8	1657.85	1210.69	644.457	710790	0.00154497	0.225753	0.00867054	5.61213	23.903	0.495928	0.0690849	1.14889	0.398324	1.25135	0.0418358	0.495928	0.396313	901.276	23.6901	264.202	2.56702	340.432	7.21316
2016-08-11	WC1_11		51.2306	26213.2	1928.79	1421.68	776.642	780661	0.00169521	0.248072	0.010449	6.16381	23.849	0.519859	0.0739698	2.27827	0.427454	2.33683	0.0419304	0.519859	0.222463	1040.64	45.9837	264.787	2.6967	361.367	14.1121
2016-08-11	WC1_12		54.6451	16968.5	1265.74	1041.15	85.5031	515674	0.000282535	0.160583	0.00115036	4.07156	23.9933	0.526798	0.0735016	1.43782	0.422194	1.53129	0.0416783	0.526798	0.344023	1027.82	29.0767	263.227	2.71692	357.619	9.18974
2016-08-11	WC1_13		-20.929	17835.6	1276.64	981.63	209.37	547473	0.000651653	0.168789	0.00281686	4.32264	24.3504	0.655471	0.0716618	1.89087	0.40559	2.00126	0.0410671	0.655471	0.32753	976.352	38.5395	259.444	3.33277	345.695	11.6599
2016-08-11	WC1_14		61.1772	21165.5	1530.97	1123.97	777.685	649383	0.00204065	0.200302	0.010463	5.12728	24.6794	0.580862	0.0718502	1.21174	0.401235	1.34377	0.0405196	0.580862	0.432264	981.699	24.6773	256.053	2.91567	342.544	7.78405
2016-08-11	NR1511_G1_01		118.523	1856.73	945.945	2311.54	bdl	19227.1	bdl	0.0175714	-1.05937e-05	0.15181	8.30882	2.02502	0.516733	2.54907	8.57101	3.25552	0.120354	2.02502	0.622025	4289.66	37.4724	732.601	27.9859	2293.49	57.5428
2016-08-11	NR1511_G1_02		145.294	2056.53	1093.19	2586.56	28.9001	17760.9	0.00277268	0.0194623	0.000388823	0.140234	6.91461	1.95097	0.535841	2.13482	10.6801	2.89201	0.144621	1.95097	0.674605	4342.97	31.2909	870.742	31.703	2495.69	52.3298
2016-08-11	NR1511_G1_03		509.514	11357.2	7739.71	19526	999.229	42775.9	0.0398045	0.10748	0.0134436	0.337742	2.75553	5.51884	0.682498	1.04998	34.1352	5.61784	0.362907	5.51884	0.982379	4694.3	15.1142	1995.94	186.733	3613.95	105.196
2016-08-11	NR1511_G1_04		256.856	5872.68	3651.61	8608.36	511.916	36367.4	0.0239857	0.0555769	0.00688733	0.287143	4.93818	3.93688	0.599295	1.34783	16.7255	4.1612	0.202504	3.93688	0.94609	4506.29	19.585	1188.76	84.9147	2919.23	76.7609
2016-08-11	NR1511_G1_05		363.344	6587.74	4305.33	10744.8	692.871	28940	0.0407961	0.062344	0.00932191	0.2285	3.47354	4.3889	0.637112	1.33118	25.2784	4.58634	0.287891	4.3889	0.956951	4595	19.256	1630.98	125.264	3319.03	85.8589
2016-08-11	NR1511_G1_06		34.2865	1835.69	655.24	1426.33	246.039	31074	0.0134919	0.0173723	0.00331022	0.245349	13.584	1.67573	0.353441	2.11319	3.58587	2.69697	0.073616	1.67573	0.621338	3721.89	32.1618	457.904	14.7971	1546.41	41.9476
2016-08-11	NR1511_G1_07		103.823	965.682	242.787	511.772	8.73641	20176	0.000737845	0.00913887	0.00011754	0.159302	16.6365	2.75896	0.256223	3.80749	2.12256	4.702	0.0601087	2.75896	0.586762	3223.63	60.0924	376.287	20.1373	1156.17	62.9169
2016-08-11	NR1511_G1_08		54.7394	1743.49	1072.71	2559.8	12.4939	12094.2	0.0017603	0.0164998	0.000168093	0.095491	5.54806	2.36951	0.617825	2.2902	15.3473	3.29539	0.180243	2.36951	0.719037	4550.49	33.2033	1068.3	46.4866	2837.04	60.9608
2016-08-11	NR1511_G1_09		50.9531	695.602	122.143	238.751	bdl	15574.5	bdl	0.00658293	-1.05937e-05	0.122971	18.0886	2.36702	0.182361	4.67328	1.38942	5.23854	0.0552835	2.36702	0.451847	2674.46	77.3455	346.878	15.9676	884.449	60.049
2016-08-11	NR1511_G1_10		26.2517	1317.55	497.497	1139.55	48.393	19632.7	0.00420019	0.0124688	0.00065108	0.155012	11.6128	2.48841	0.360948	3.4421	4.28363	4.24738	0.0861117	2.48841	0.585869	3753.85	52.2756	532.5	25.3864	1690.22	67.6266
2016-08-11	NR1511_G1_11		33.5453	2419.06	820.309	1859.66	332.808	43267.5	0.0131068	0.0228931	0.00447761	0.341624	13.8764	1.8124	0.34009	2.57978	3.37772	3.15278	0.0720649	1.8124	0.574857	3663.18	39.4195	448.584	15.6883	1499.24	48.2362
2016-08-11	NR1511_G1_12		187.026	4740.68	2446.5	5729.77	910.164	42260.6	0.0366986	0.044864	0.0122454	0.333674	7.17318	1.40133	0.508283	1.19973	9.76562	1.84474	0.139408	1.40133	0.759634	4265.41	17.6604	841.315	22.0675	2412.91	33.4263
2016-08-11	NR1511_G1_13		256.76	6542.7	3819.22	9269.09	825.087	39640.1	0.0354675	0.0619178	0.0111007	0.312983	5.22181	6.35345	0.55132	1.94724	14.5509	6.64515	0.191504	6.35345	0.956103	4384.66	28.477	1129.52	130.33	2786.33	119.014
2016-08-11	NR1511_G1_14		60.4184	2502.28	909.017	2163.25	461.915	35339.3	0.0222725	0.0236806	0.00621461	0.279026	11.3643	2.07408	0.374146	2.64778	4.53739	3.36341	0.0879951	2.07408	0.616659	3808.29	40.0684	543.669	21.5912	1737.85	54.4801
2016-08-11	NR1511_G1_15		47.9348	1320.36	642.03	1524.51	71.435	13414	0.00907443	0.0124954	0.000961087	0.105912	7.94795	2.30828	0.481613	2.49945	8.35121	3.40226	0.125819	2.30828	0.678453	4185.89	36.959	763.968	33.1738	2269.89	59.9013
2016-08-11	NR1511_G1_16		-1.65554	1884.36	1021.7	2557.4	bdl	15138.7	bdl	0.0178329	-1.05937e-05	0.11953	6.48239	1.62122	0.542527	2.16866	11.5343	2.70767	0.154264	1.62122	0.598751	4361.13	31.7555	924.822	27.8747	2567.37	49.3791
2016-08-11	NR1511_G1_17		119.869	2961.58	1911.83	4700.38	13.0057	13436.2	0.00164939	0.0280273	0.000174979	0.106087	3.57919	2.63346	0.65497	1.62325	25.2198	3.09355	0.279393	2.63346	0.851274	4634.95	23.4343	1588.3	73.7225	3316.76	58.697
2016-08-11	NR1511_G1_18		68.4852	677.86	210.788	441.929	bdl	12769.8	bdl	0.00641502	-1.05937e-05	0.100825	14.7654	2.84858	0.318244	4.34929	2.97045	5.19911	0.067726	2.84858	0.547898	3561.37	66.9303	422.441	23.2535	1400.09	76.068
2016-08-11	NR1511_G1_19		69.4985	2401.74	806.847	2022.75	380.465	38153.7	0.016992	0.0227292	0.00511878	0.301247	12.7672	2.07271	0.342127	2.25045	3.69316	3.05952	0.0783258	2.07271	0.677462	3672.3	34.366	486.122	19.3815	1569.89	47.7522
2016-08-11	NR1511_G1_20		232.826	6278.56	3518.11	8337.56	964.55	46550.7	0.0353073	0.059418	0.0129771	0.367547	5.98722	4.56244	0.555548	1.83002	12.788	4.91577	0.167023	4.56244	0.928122	4395.83	26.7467	995.685	83.6413	2664.16	88.6066
2016-08-11	NR1511_G1_21		46.8689	3000.42	922.756	2009.77	304.599	53844	0.00963956	0.0283949	0.00409808	0.425131	13.6421	3.14888	0.295468	3.62063	2.98493	4.79838	0.0733023	3.14888	0.656239	3446.62	56.18	456.021	27.6674	1403.79	70.4866
2016-08-11	NR1511_G1_22		118.894	3946.97	1730.53	4059.16	500.01	47433.7	0.0179622	0.0373527	0.00672715	0.374518	9.69239	1.96897	0.433607	1.87538	6.16554	2.71917	0.103174	1.96897	0.724107	4029.92	27.9873	632.981	23.6981	1999.58	46.4355
2016-08-11	NR1511_G1_23		4.79455	1543.48	768.908	1801.35	26.5564	15519.3	0.00291583	0.014607	0.00035729	0.122535	8.1491	2.37632	0.499437	2.00365	8.4465	3.1083	0.122713	2.37632	0.764509	4239.55	29.5373	746.16	33.4003	2280.19	54.9274
2016-08-11	NR1511_G1_24		87.663	2775.29	1592.83	3844.72	5.56181	18780.2	0.00050464	0.0262643	7.48287e-05	0.148281	5.28738	2.78411	0.578241	1.71758	15.0721	3.27129	0.189129	2.78411	0.851073	4454.25	25.0257	1116.66	56.8392	2819.81	60.4624
2016-08-11	NR1511_G1_25		-24.949	863.562	111.681	204.208	bdl	19814.2	bdl	0.00817244	-1.05937e-05	0.156445	18.2929	2.88922	0.130096	5.34505	0.980137	6.07595	0.0546659	2.88922	0.475517	2099.26	93.8779	343.104	19.2788	693.675	59.309
2016-08-11	NR1511_G1_26		67.5558	1198.66	451.936	1056.24	12.7047	18482.6	0.0011713	0.0113437	0.000170929	0.145932	11.8791	3.38084	0.372983	3.66409	4.32724	4.98554	0.0841814	3.38084	0.678129	3803.58	55.4651	521.033	33.7558	1698.57	79.0787
2016-08-11	NR1511_G1_27		268.535	3899.07	2001.71	4991.58	220.181	31713	0.0118307	0.0368994	0.00296232	0.250394	6.51797	2.7691	0.522461	1.80766	11.0471	3.30689	0.153422	2.7691	0.837371	4305.86	26.5496	920.117	47.3141	2527.11	59.7857
2016-08-11	NR1511_G1_28		75.307	3720.4	2035.85	4670.9	394.454	28804.8	0.0233345	0.0352085	0.00530699	0.227431	6.12933	3.65474	0.52669	1.62065	11.8426	3.99796	0.16315	3.65474	0.914153	4317.7	23.7874	974.259	65.7566	2592.04	72.2358

## Sheet: MC-ICP-MS Fig 7d
Date	Spot	Comment	204Pb*	206Pb mV	207Pb mV	238U mV	Pb ppm	U ppm	238U/206Pb	1s %	207Pb/206Pb	1s %	207Pb/235U	1s %	206Pb/238U	1s %	Rho	207Pb/206Pb	2s abs	206Pb/238U	2s abs	207Pb/235U	2s abs
2012-05-11	WC1_01		492.922	0.594723	0.0554389	14.1762	0.190739	4.57201	22.9257	1.06515	0.111693	1.89077	0.671744	2.17015	0.0436192	1.06515	0.49082	1827.14	34.285	275.228	5.73724	521.772	17.5559
2012-05-11	WC1_02		429.107	0.604824	0.0557887	14.4041	0.193979	4.64551	22.6627	1.08	0.117303	0.958831	0.713675	1.44422	0.0441255	1.08	0.747812	1915.54	17.2023	278.354	5.88181	546.926	12.1413
2012-05-11	WC1_03		423.138	0.680609	0.0623208	16.5948	0.218284	5.35204	23.2392	1.21904	0.117588	1.62815	0.697656	2.03394	0.0430307	1.21904	0.599348	1919.88	29.1953	271.591	6.4808	537.39	16.8339
2012-05-11	WC1_04		239.73	0.697566	0.0639631	16.6501	0.223723	5.36988	22.8346	1.16296	0.115606	0.621277	0.698051	1.31851	0.0437931	1.16296	0.882028	1889.35	11.1811	276.302	6.28772	537.626	10.948
2012-05-11	WC1_05		326.266	0.578711	0.0501657	13.9429	0.185604	4.49677	22.9402	1.17628	0.108819	0.656119	0.654043	1.3469	0.0435915	1.17628	0.873327	1779.73	11.9668	275.057	6.33166	510.964	10.7585
2012-05-11	WC1_06		350.197	0.630826	0.0501311	15.1154	0.202318	4.87491	22.7832	1.05678	0.101501	0.765494	0.614271	1.3049	0.0438921	1.05678	0.809856	1651.76	14.1884	276.913	5.72627	486.25	10.034
2012-05-11	WC1_07		336.423	0.749538	0.0534356	18.1354	0.240391	5.8489	23.0165	1.05792	0.0901862	1.34553	0.54026	1.71162	0.0434472	1.05792	0.618081	1429.47	25.6832	274.165	5.67677	438.596	12.1194
2012-05-11	WC1_08		450.738	0.499959	0.0446415	11.6372	0.160346	3.75315	22.2459	1.10374	0.118894	2.02849	0.736902	2.30933	0.0449521	1.10374	0.477947	1939.66	36.2891	283.455	6.11874	560.596	19.7043
2012-05-11	WC1_09		313.86	0.55437	0.0467542	13.2951	0.177797	4.28784	22.7258	1.07203	0.106771	1.41904	0.64779	1.77846	0.0440028	1.07203	0.602787	1745.01	25.9934	277.596	5.8229	507.118	14.1
2012-05-11	WC1_10		307.415	0.611714	0.0505898	14.9007	0.196188	4.80567	23.0488	1.22904	0.104172	1.16917	0.623169	1.69632	0.0433862	1.22904	0.724532	1699.75	21.5385	273.788	6.58563	491.831	13.14
2012-05-11	WC1_11		190.162	0.713301	0.049415	18.4097	0.228769	5.93737	24.2687	1.10119	0.0883292	0.526298	0.501832	1.22049	0.0412053	1.10119	0.902248	1389.65	10.1008	260.3	5.61614	412.942	8.24836
2012-05-11	WC1_12		212.753	0.608768	0.0453872	15.7927	0.195243	5.09335	24.004	1.40306	0.092893	1.09493	0.533581	1.77973	0.0416597	1.40306	0.788355	1485.71	20.7414	263.112	7.23055	434.184	12.4978
2012-05-11	WC1_13		316.449	0.589467	0.0426056	14.8783	0.189053	4.79845	24.0253	1.26137	0.092597	0.575823	0.53141	1.38659	0.0416228	1.26137	0.909694	1479.66	10.9168	262.884	6.49523	432.745	9.72447
2012-05-11	WC1_14		220.502	0.65978	0.0505804	17.0565	0.211604	5.50095	23.9568	1.4017	0.0969514	1.96992	0.557991	2.41772	0.0417419	1.4017	0.579762	1566.28	36.9196	263.621	7.23722	450.218	17.4339
2012-05-11	WC1_15		141.494	0.679268	0.0502397	17.5835	0.217854	5.67091	24.4675	1.10278	0.0932945	1.51389	0.525737	1.87296	0.0408706	1.10278	0.588787	1493.87	28.6466	258.227	5.58036	428.977	13.0224
2012-05-11	WC1_16		302.697	0.647789	0.046684	16.7094	0.207758	5.389	24.004	1.13087	0.0902149	0.6733	0.518198	1.31613	0.0416597	1.13087	0.859239	1430.08	12.8508	263.112	5.8285	423.947	9.08205
2012-05-11	WC1_17		189.444	0.525108	0.044984	13.0675	0.168412	4.21444	23.2013	1.19249	0.107133	0.51635	0.636668	1.29948	0.0431011	1.19249	0.917666	1751.21	9.45096	272.026	6.34965	500.241	10.214
2012-05-11	WC1_18		207.837	0.684231	0.0570804	17.7856	0.219446	5.73609	23.1868	1.21814	0.104315	0.792559	0.620307	1.45328	0.043128	1.21814	0.838202	1702.27	14.5959	272.193	6.49006	490.04	11.236
2012-05-11	WC1_19		147.731	0.598916	0.0508319	15.5219	0.192084	5.00602	22.7227	1.19759	0.107614	1.13289	0.652992	1.64854	0.0440088	1.19759	0.726457	1759.4	20.7147	277.634	6.50539	510.319	13.1396
2012-05-11	WC1_20		180.303	0.56251	0.0441269	14.4079	0.180408	4.64674	22.5476	1.17073	0.0991451	0.523823	0.606279	1.28258	0.0443507	1.17073	0.912797	1608.1	9.76387	279.744	6.40685	481.211	9.78367
2012-05-11	877-3_58		817.089	0.198279	0.123263	1.05088	0.0635918	0.338923	4.64536	1.39702	0.783612	0.304573	23.2585	1.42983	0.215268	1.39702	0.977049	4892.24	4.34367	1256.82	31.8262	3237.82	27.4647
2012-05-11	877-3_24		875.227	0.143349	0.0883001	0.846347	0.0459747	0.272958	5.41121	1.90665	0.777915	0.335968	19.8216	1.93602	0.184802	1.90665	0.984828	4881.83	4.79367	1093.15	38.2288	3082.7	36.7545
2012-05-11	877-3_63		919.777	0.272614	0.161979	12.9937	0.0874325	4.19064	41.3645	2.22311	0.752505	0.247726	2.50832	2.23687	0.0241753	2.22311	0.993849	4834.39	3.54233	153.99	6.76205	1274.44	31.969
2012-05-11	877-3_06		931.225	0.186525	0.114505	2.91812	0.0598221	0.941132	14.4585	4.45134	0.770622	0.270194	7.34883	4.45953	0.0691633	4.45134	0.998163	4868.39	3.85756	431.113	37.0189	2154.77	76.7409
2012-05-11	877-3_62		967.657	0.261615	0.158669	4.74358	0.0839049	1.52987	15.8969	2.0144	0.770801	0.25345	6.68546	2.03028	0.0629054	2.0144	0.992178	4868.72	3.61846	393.271	15.3522	2070.7	35.2467
2012-05-11	877-3_45		1062.83	0.313442	0.160902	60.3021	0.100527	19.4482	172.938	1.85001	0.650053	0.393113	0.518273	1.89131	0.0057824	1.85001	0.97816	4624.07	5.67828	37.1684	1.37113	423.997	13.027
2012-05-11	877-3_44		1104.62	0.356073	0.191935	53.8493	0.114199	17.3671	135.344	2.8857	0.680219	0.405571	0.692962	2.91406	0.00738856	2.8857	0.990267	4689.49	5.83943	47.4546	2.72816	534.579	23.9382
2012-05-11	877-3_11	rejected large uncertainyy	1192.16	0.185461	0.119348	0.0203598	0.0594809	0.0065663	0.102854	22.6499	0.813677	0.346267	1090.77	22.6525	9.72256	22.6499	0.999883	4945.87	4.92637	15293.2	2218.35	7103.17	379.123
2012-05-11	877-3_20		1203.93	0.422771	0.257535	8.86243	0.135591	2.85825	19.3458	1.44615	0.771163	0.261568	5.49618	1.46961	0.0516908	1.44615	0.984033	4869.39	3.73425	324.894	9.15751	1900	24.9414
2012-05-11	877-3_19		1318.17	0.356411	0.219456	1.71005	0.114308	0.551514	4.6007	6.06394	0.779087	0.26887	23.3487	6.06989	0.217358	6.06394	0.999018	4883.98	3.83593	1267.9	138.102	3241.59	111.814
2012-05-11	877-3_29		1602.66	0.434162	0.254656	29.4767	0.139244	9.50662	62.1239	1.6935	0.741792	0.257235	1.64636	1.71292	0.0160969	1.6935	0.98866	4813.88	3.68181	102.941	3.45798	988.155	21.4134
2012-05-11	877-3_22		1765.68	0.423268	0.26305	0.815783	0.13575	0.263101	1.77993	5.95829	0.78634	0.235653	60.9128	5.96295	0.56182	5.95829	0.999219	4897.19	3.36	2874.14	270.576	4189.19	112.651
2012-05-11	877-3_30		1778.39	0.477613	0.254624	64.3235	0.15318	20.7452	120.239	5.97595	0.691176	0.612308	0.792585	6.00724	0.0083168	5.97595	0.994792	4712.48	8.80624	53.3918	6.35185	592.637	52.5549
2012-05-11	877-3_17		1888.28	0.557241	0.342513	0.762706	0.178718	0.245983	1.24171	8.13285	0.776339	0.237196	86.2048	8.13631	0.805339	8.13285	0.999575	4878.94	3.38481	3808.21	451.556	4536.99	151.456
2012-05-11	877-3_48		1975.51	0.587182	0.342637	44.6888	0.18832	14.4127	68.2449	2.1567	0.736458	0.285455	1.48792	2.17551	0.0146531	2.1567	0.991354	4803.55	4.0877	93.7747	4.01436	925.467	26.084
2012-05-11	877-3_43		2319.99	0.730605	0.417834	67.9036	0.234319	21.8998	77.7198	7.29679	0.717993	0.684474	1.27377	7.32883	0.0128667	7.29679	0.995629	4767.16	9.81844	82.4152	11.9397	834.074	80.1289
2012-05-11	877-3_51		2366.82	0.764205	0.442876	60.4484	0.245095	19.4954	70.2154	2.91528	0.731575	0.317077	1.43657	2.93247	0.0142419	2.91528	0.994137	4794.02	4.54256	91.1615	5.27565	904.293	34.5175
2012-05-11	877-3_39		2547.24	0.806709	0.474833	51.0692	0.258727	16.4705	56.1151	3.19096	0.743932	0.274618	1.82791	3.20275	0.0178205	3.19096	0.996317	4818	3.92986	113.867	7.19906	1055.53	41.1939
2012-05-11	877-3_49		2608.74	0.841768	0.49151	64.616	0.269971	20.8395	66.6515	6.60795	0.736044	0.441854	1.52263	6.62271	0.0150034	6.60795	0.997772	4802.74	6.32756	95.9999	12.581	939.537	78.0959
2012-05-11	877-3_23		2685.66	0.727143	0.450429	0.919507	0.233209	0.296553	1.1675	3.30706	0.783806	0.251872	92.5667	3.31663	0.856534	3.30706	0.997112	4892.59	3.59201	3988.47	193.771	4608.49	64.538
2012-05-11	877-3_42	culled based on Pb	2848.06	0.836241	0.502893	39.1489	0.268198	12.626	42.3167	1.58303	0.760355	0.21699	2.47745	1.59783	0.0236313	1.58303	0.990736	4849.23	3.1007	150.565	4.71002	1265.47	22.858
2012-05-11	877-3_31	culled based on Pb	3723.89	1.09462	0.653455	51.6567	0.351065	16.66	44.1603	2.58584	0.754999	0.247441	2.35731	2.59765	0.0226448	2.58584	0.995453	4839.13	3.53749	144.349	7.37811	1229.77	36.38
2012-05-11	877-3_57	culled based on Pb	4081.02	1.28782	0.800297	2.70673	0.413028	0.872956	1.74491	13.995	0.786234	0.22735	62.127	13.9969	0.573096	13.995	0.999868	4897	3.24164	2920.52	625.949	4208.91	247.084
2012-05-11	877-3_04	culled based on Pb	4740.5	1.37893	0.851865	0.56887	0.442249	0.183468	0.374014	7.54682	0.781047	0.214708	287.933	7.54987	2.6737	7.54682	0.999596	4887.56	3.06271	8388.07	671.881	5753.36	142.331
2012-05-11	877-3_54	culled based on Pb	5094.59	1.59992	0.989369	6.81354	0.513125	2.19746	3.77117	1.32375	0.782269	0.215606	28.6011	1.3412	0.26517	1.32375	0.986994	4889.79	3.0752	1516.24	35.6721	3439.92	25.9812
2012-05-11	877-3_47	culled based on Pb	5282.95	1.666	1.01699	55.2544	0.534318	17.8203	29.924	9.03272	0.766987	0.349679	3.53403	9.03948	0.033418	9.03272	0.999252	4861.64	4.99392	211.905	37.5496	1534.86	133.859
2012-05-11	877-3_01	culled based on Pb	5437.13	1.71195	1.06616	5.65509	0.549055	1.82384	3.0864	8.08672	0.787997	0.210606	35.2025	8.08946	0.324002	8.08672	0.999661	4900.2	3.00246	1809.24	250.221	3644.34	148.355
2012-05-11	877-3_40	culled based on Pb	5596.43	1.8005	1.10739	32.8699	0.577455	10.601	16.4385	1.92412	0.777977	0.207158	6.52538	1.93524	0.0608328	1.92412	0.994254	4881.94	2.95577	380.688	14.21	2049.33	33.5185
2012-05-11	877-3_28	culled based on Pb	6005.46	1.82626	1.13361	3.0195	0.585716	0.973828	1.47401	4.53369	0.785713	0.208039	73.4961	4.53846	0.678421	4.53369	0.998949	4896.06	2.96643	3338.3	232.038	4377.06	87.0849
2012-05-11	877-3_08	culled based on Pb	6415.83	2.0031	1.24064	5.06287	0.642432	1.63284	2.30181	5.16177	0.783097	0.2124	46.9081	5.16613	0.434441	5.16177	0.999154	4891.3	3.02927	2325.71	198.469	3928.81	97.8521
2012-05-11	877-3_35	culled based on Pb	6416.05	2.01648	1.24732	0.406067	0.646723	0.130962	0.135877	11.9989	0.782568	0.206748	794.103	12.0007	7.35959	11.9989	0.999852	4890.34	2.94879	13688.4	1235.59	6781.21	218.185
2012-05-11	877-3_18	culled based on Pb	7176.79	2.34572	1.44486	0.360742	0.752317	0.116344	0.143964	3.048	0.779541	0.208164	746.595	3.0551	6.94617	3.048	0.997676	4884.81	2.96974	13361.4	334.679	6718.65	60.1421
2012-05-11	877-3_36	culled based on Pb	7768.63	2.54353	1.54523	31.0523	0.815758	10.0148	10.6826	7.12106	0.787239	0.23164	10.1609	7.12483	0.0936104	7.12106	0.999471	4898.82	3.30255	576.854	78.1125	2449.53	123.854
2012-05-11	877-3_61	culled based on Pb	8305.64	2.66083	1.65301	1.32844	0.853379	0.428439	0.439379	4.33495	0.785615	0.204629	246.531	4.33978	2.27594	4.33495	0.998888	4895.88	2.91783	7649.35	377.046	5596.32	84.1863
2012-05-11	877-3_55	culled based on Pb	8481.11	2.72916	1.69526	4.25584	0.875293	1.37256	1.4077	1.96304	0.78577	0.2049	76.9637	1.97371	0.710378	1.96304	0.994597	4896.16	2.92166	3459.88	104.27	4423.26	38.8158
2012-05-11	877-3_16	culled based on Pb	8762.07	2.86396	1.76499	0.327051	0.918526	0.105478	0.0985639	6.87404	0.779297	0.204981	1090.15	6.87709	10.1457	6.87404	0.999556	4884.36	2.92438	15542.7	760.114	7102.59	130.74
2012-05-11	877-3_52	culled based on Pb	9231.45	2.95438	1.8381	10.8313	0.947526	3.49324	3.31137	9.65491	0.786403	0.210252	32.7445	9.6572	0.301989	9.65491	0.999763	4897.31	2.99781	1701.17	282.444	3572.95	174.426
2012-05-11	877-3_05	culled based on Pb	9477.57	2.96286	1.82972	0.209071	0.950245	0.0674281	0.062848	6.36386	0.780788	0.206779	1712.94	6.36721	15.9114	6.36386	0.999473	4887.09	2.94966	18230.4	729.13	7561.1	121.642
2012-05-11	877-3_46	culled based on Pb	9519.05	3.02569	1.87409	39.0468	0.970396	12.5931	11.4757	7.75351	0.782171	0.233991	9.39771	7.75704	0.0871403	7.75351	0.999545	4889.61	3.33746	538.602	79.6333	2377.61	133.24
2012-05-11	877-3_34	culled based on Pb	9659.83	3.06611	1.91123	1.40521	0.98336	0.453199	0.431762	3.22449	0.788192	0.209439	251.703	3.23129	2.31609	3.22449	0.997897	4900.55	2.98579	7727.88	284.012	5617.32	63.3427
2012-05-11	877-3_41	culled based on Pb	9718.53	3.0489	1.91516	31.7572	0.97784	10.2421	9.34293	1.50233	0.784869	0.206391	11.5828	1.51644	0.107033	1.50233	0.990695	4894.52	2.94314	655.492	18.6999	2571.29	27.9594
2012-05-11	877-3_02	culled based on Pb	12254.1	3.89824	2.44476	2.4694	1.25024	0.796414	0.598955	2.65152	0.793113	0.205086	182.575	2.65944	1.66957	2.65152	0.997022	4909.42	2.92256	6329.85	210.33	5292.81	52.3403
2012-05-11	877-3_64	culled based on Pb	12583.4	4.13225	2.57385	25.6412	1.32529	8.26962	5.42303	2.1935	0.787662	0.203836	20.0262	2.20295	0.184399	2.1935	0.99571	4899.59	2.90603	1090.96	43.88	3092.62	41.7393
2012-05-11	877-3_26	culled based on Pb	12697.6	4.03525	2.50021	0.852295	1.29418	0.274876	0.19382	1.79647	0.783423	0.206414	557.314	1.80829	5.15944	1.79647	0.993464	4891.89	2.94382	11719.5	191.15	6422.22	36.0101
2012-05-11	877-3_12	culled based on Pb	12819.7	3.34661	2.13955	0.245992	1.07332	0.0793356	0.0659389	3.44527	0.808663	0.208274	1690.93	3.45156	15.1655	3.44527	0.998178	4937.07	2.9643	17939.6	403.799	7547.98	67.7408
2012-05-11	877-3_03	culled based on Pb	13956.7	4.39774	2.73723	1.12996	1.41044	0.364427	0.234245	4.79045	0.787194	0.204611	463.353	4.79481	4.26903	4.79045	0.999089	4898.74	2.91719	10712.9	481.934	6235.11	92.7898
2012-05-11	877-3_09	culled based on Pb	14657.9	4.73334	2.93905	0.749966	1.51807	0.241874	0.145906	4.20599	0.785305	0.203616	742.105	4.21091	6.85371	4.20599	0.99883	4895.32	2.90346	13286	456.661	6712.53	81.997
2012-05-11	877-3_33	culled based on Pb	14892.1	4.76384	2.97193	3.73768	1.52785	1.20545	0.615525	8.06407	0.789294	0.203347	176.805	8.06664	1.62463	8.06407	0.999682	4902.54	2.89868	6220.4	613.426	5260.38	151.075
2012-05-11	877-3_21	culled based on Pb	15092.5	4.84074	3.03506	2.50741	1.55252	0.808673	0.46082	3.28927	0.792912	0.207896	237.244	3.29584	2.17004	3.28927	0.998009	4909.06	2.96265	7437.52	283.956	5557.49	64.5536
2012-05-11	877-3_56	culled based on Pb	15813.9	5.11566	3.18206	0.615626	1.64069	0.198547	0.105413	3.41738	0.786866	0.205748	1029.22	3.42357	9.48651	3.41738	0.998193	4898.15	2.93348	15149.7	386.745	7044.25	67.1847
2012-05-11	877-3_27	culled based on Pb	15953.7	5.06846	3.14911	0.336619	1.62555	0.108564	0.0601451	5.09122	0.782166	0.229473	1793.08	5.09639	16.6265	5.09122	0.998986	4889.6	3.27303	18497.3	591.205	7607.5	98.5019
2012-05-11	877-3_53	culled based on Pb	16172.7	5.2061	3.24881	2.95921	1.6697	0.954384	0.440995	7.12643	0.789169	0.205422	246.739	7.12939	2.2676	7.12643	0.999585	4902.31	2.92829	7632.91	608.017	5597.17	134.835
2012-05-11	877-3_07	culled based on Pb	17573	5.6143	3.49535	1.35438	1.80061	0.436805	0.203492	6.78927	0.787381	0.204608	533.506	6.79236	4.91421	6.78927	0.999546	4899.08	2.91712	11457.6	689.141	6377.97	129.111
2012-05-11	877-3_10	culled based on Pb	17578.5	5.70166	3.54984	2.62286	1.82863	0.845907	0.437212	3.38639	0.787194	0.202506	248.251	3.39244	2.28722	3.38639	0.998217	4898.74	2.88718	7671.5	296.843	5603.35	66.3971
2012-05-11	877-3_13	culled based on Pb	17823.7	5.0282	3.21498	0.290165	1.61264	0.093582	0.0541107	3.76081	0.809225	0.208263	2061.99	3.76657	18.4806	3.76081	0.99847	4938.06	2.964	19142.1	444.314	7749.31	73.7116
2012-05-11	877-3_50	culled based on Pb	18112.3	5.89536	3.6895	6.33568	1.89075	2.04334	0.821775	9.09467	0.791308	0.206923	132.768	9.09703	1.21688	9.09467	0.999741	4906.17	2.94917	5131.99	613.495	4971.42	168.56
2012-05-11	877-3_37	culled based on Pb	19105.4	6.09834	3.82033	8.80421	1.95585	2.83947	1.05957	14.8676	0.792542	0.203551	103.132	14.869	0.943781	14.8676	0.999906	4908.39	2.90081	4284.51	869.361	4717.13	262.115
2012-05-11	877-3_25	culled based on Pb	19120.8	6.07527	3.8156	0.673487	1.94845	0.217208	0.095648	5.16704	0.794919	0.202657	1145.9	5.17101	10.455	5.16704	0.999232	4912.66	2.88752	15719.1	581.031	7153.19	99.8456
2012-05-11	877-3_59	culled based on Pb	19773.1	6.46893	4.03537	0.212547	2.07471	0.0685492	0.027669	6.16877	0.789158	0.203581	3932.53	6.17213	36.1415	6.16877	0.999456	4902.29	2.90204	23302.1	730.873	8404.62	118.16
2012-05-11	877-3_32	culled based on Pb	20092.3	6.38184	3.99006	0.629025	2.04678	0.202869	0.0862901	6.12252	0.790904	0.203333	1263.76	6.1259	11.5888	6.12252	0.999449	4905.44	2.8981	16327.5	688.546	7252.51	117.265
2012-05-11	877-3_38	culled based on Pb	20744.1	6.6124	4.14225	15.7185	2.12072	5.06942	1.87864	9.07276	0.792617	0.203319	58.1729	9.07504	0.5323	9.07276	0.999749	4908.53	2.89749	2751.13	394.057	4143.23	166.712
2012-05-11	877-3_60	culled based on Pb	20852.3	6.81629	4.26101	1.45936	2.18611	0.470663	0.194662	3.08643	0.790799	0.204307	560.125	3.09318	5.1371	3.08643	0.997816	4905.25	2.912	11696.1	324.768	6427.32	60.8435
2012-05-11	877-3_15	culled based on Pb	21869.4	6.45044	4.11456	0.281444	2.06878	0.0907694	0.043073	4.29609	0.806492	0.208668	2581.64	4.30116	23.2164	4.29609	0.998822	4933.25	2.97041	20544.9	510.276	7977.43	83.7608
2012-05-11	877-3_14	culled based on Pb	26132.6	7.48506	4.77203	0.289371	2.4006	0.0933259	0.0365874	9.20136	0.806844	0.207631	3040.6	9.2037	27.3318	9.20136	0.999746	4933.87	2.95557	21556.7	1053.48	8143.51	171.508
								3.52444

## Sheet: Q-ICP-MS Fig 8
5	BM18	n=21 (c. 60s / 59 pixels each)																											Lower Intercept Age [Ma] ±2s		61	1.7 / 2.6							Isochron Age [Ma] ±2s		59.6	4.7 / 5		86-TW Intercept Age [Ma] ±2s		60.4	1.8 / 2.6
6	Critera:	for targeting the low Sr portion of the vein: Rb_ppm_SQ_m85 < 0.05;Th_ppm_SQ_m232 < 0.01;Sr_ppm_SQ_m88 < 400																											MSWD		1.11791								MSWD		0.417168			MSWD		0.835381
7		for cleaning up of low U and Pb data set as no outlier rejection routine is applied to the pooled pixels: Pb208_CPS > 0;Pb207_CPS > 0;Pb206_CPS > 0;U238_CPS > 500;Final207_206 < 1.5																											207Pb/206Pbinitial		0.705072	0.0218829							206Pb/208Pbinitial		0.647549	0.0248681		208Pb/206Pbinitial		1.54695	0.0463268
8	Pooling channel: C207_235
9		semiquantitative element data																							internal element standard: Ca as in stoechiometric CaCO3				Tera-Wasserburg columns										Isochron columns					86-TW (sensu Parrish et al., 2018)
10		Mg_ppm_SQ_m25	Mg_ppm_SQ_m25_Int2SE	Ca_ppm_SQ_m43	Ca_ppm_SQ_m43_Int2SE	Mn_ppm_SQ_m55	Mn_ppm_SQ_m55_Int2SE	Fe_ppm_SQ_m57	Fe_ppm_SQ_m57_Int2SE	Cu_ppm_SQ_m63	Cu_ppm_SQ_m63_Int2SE	Ga_ppm_SQ_m71	Ga_ppm_SQ_m71_Int2SE	Rb_ppm_SQ_m85	Rb_ppm_SQ_m85_Int2SE	Sr_ppm_SQ_m88	Sr_ppm_SQ_m88_Int2SE	Ba_ppm_SQ_m137	Ba_ppm_SQ_m137_Int2SE	Ce_ppm_SQ_m140	Ce_ppm_SQ_m140_Int2SE		207Pb (cps)	208Pb (cps)	Th [ppm]	U [ppm]	Pb [ppm]		238U/206Pb	±2s [%]	207Pb/206Pb	±2s [%]		207Pb-corrected age [Ma]	±2s		206Pbrad [%]		238U/208Pbc	±2s [%]	206Pbt/208Pbc	±2s [%]		238U/206Pb	±2s [%]	208Pbc/206Pbt	±2s [%]		208Pb-corrected age [Ma]
11	ECDFGlobal	2800	43	520000	2200	34	0.5	75	0.42	0.3	0.014	0.008	0.00056	0.0017	0.00033	220	4.2	0.18	0.02	0.25	0.015		112.297	264.127	0.0009	0.158	0.006		49.5025	3.94541	0.385312	4.84837		62.9959	4.94814		46.9405		108.477	14.4164	2.19135	10.9475		49.5025	3.94541	0.456339	10.9475		91.1614
12	ECDF0	2500	250	520000	9000	34	2.6	73	1.8	0.13	0.027	0.015	0.0033	0.002	0.0015	220	20	0.1	0.02	0.5	0.1		11.9457	45.8337	0.001	0.256	0.003		99.7323	8.65586	0.0528916	13.9321		63.7721	5.55007		94.5707		1583.17	56.0237	15.8742	59.0661		99.7323	8.65586	0.0629953	59.0661		61.7087
13	ECDF1	2600	230	520000	10000	36	2.6	72	1.6	0.22	0.056	0.015	0.0043	0.0032	0.0018	220	19	0.11	0.021	0.5	0.12		31.0263	79.9363	0.0015	0.288	0.004		93.569	6.06364	0.110963	9.0037		61.9257	3.89148		88.7263		465.201	23.5392	4.97174	21.3123		93.569	6.06364	0.201137	21.3123		59.6601
14	ECDF2	2500	220	520000	11000	35	2.6	72	1.6	0.18	0.04	0.0098	0.003	0.0035	0.0016	230	22	0.12	0.021	0.42	0.096		36.1122	83.0627	0.001	0.225	0.004		88.505	6.18759	0.14837	7.429		61.3485	3.99116		83.9245		342.848	28.9702	3.87377	20.9557		88.505	6.18759	0.258147	20.9557		60.3983
15	ECDF3	2600	210	510000	9500	38	2.1	72	1.7	0.23	0.053	0.0082	0.0027	0.003	0.0021	200	18	0.12	0.015	0.34	0.06		50.6813	111.333	0.0017	0.258	0.005		85.451	5.8849	0.184459	7.43209		59.4273	3.85577		81.0285		275.63	23.0105	3.22559	20.7006		85.451	5.8849	0.31002	20.7006		60.0408
16	ECDF4	2500	200	530000	12000	37	2.3	73	1.5	0.25	0.046	0.01	0.0026	0.0023	0.0016	220	18	0.12	0.022	0.35	0.064		65.163	129.274	0.0022	0.26	0.006		80.0931	6.47343	0.216926	7.80933		59.4487	4.40782		75.9479		218.067	12.2505	2.72267	12.4262		80.0931	6.47343	0.367287	12.4262		61.0866
17	ECDF5	2500	160	520000	11000	38	2	73	1.4	0.27	0.058	0.013	0.0029	0.0057	0.0025	230	18	0.15	0.025	0.44	0.099		79.4528	175.271	0.0019	0.263	0.007		70.49	5.7098	0.234183	6.81426		65.1421	4.39634		66.8418		155.058	12.5404	2.19971	12.5508		70.49	5.7098	0.454605	12.5508		64.2552
18	ECDF6	2800	190	530000	7600	38	2.2	72	1.8	0.33	0.062	0.011	0.0032	0.0028	0.0018	220	20	0.17	0.077	0.35	0.11		77.8244	157.68	0.0016	0.214	0.006		71.6193	6.26653	0.281213	7.43089		57.7318	4.71077		67.9126		140.766	13.4996	1.96547	12.8473		71.6193	6.26653	0.508784	12.8473		60.1246
19	ECDF7	2600	190	520000	9200	39	2.1	72	1.8	0.36	0.057	0.011	0.003	0.002	0.0016	220	19	0.14	0.023	0.33	0.072		96.1862	225.517	0.002	0.236	0.008		64.9425	5.60598	0.295994	6.59297		61.4361	4.67627		61.5815		107.175	13.1584	1.6503	11.0515		64.9425	5.60598	0.605951	11.0515		60.1002
20	ECDF8	2900	190	530000	10000	38	2.1	74	1.6	0.42	0.099	0.0096	0.0025	0.003	0.0024	200	17	0.14	0.023	0.31	0.067		103.914	238.487	0.0015	0.208	0.007		61.551	7.90459	0.339667	9.31868		57.9108	6.94477		58.3654		92.2474	13.8729	1.49872	13.8291		61.551	7.90459	0.667238	13.8291		59.2856
21	ECDF9	2700	170	520000	10000	38	2.3	74	1.7	0.36	0.065	0.0085	0.0028	0.0034	0.0025	210	18	0.15	0.029	0.27	0.06		113.771	267.961	0.0016	0.197	0.008		54.6197	6.64788	0.356233	8.07762		62.2881	6.82917		51.7929		73.8137	11.8253	1.35141	10.7186		54.6197	6.64788	0.739967	10.7186		61.2762
22	ECDF10	2500	210	520000	10000	36	2.4	75	2	0.32	0.063	0.012	0.0031	0.0015	0.0014	250	20	0.18	0.028	0.38	0.076		140.32	332.636	0.0017	0.197	0.01		51.1444	6.08732	0.395206	7.2117		59.0978	6.86278		48.4974		57.3229	9.25099	1.12081	8.67799		51.1444	6.08732	0.892214	8.67799		53.1276
23	ECDF11	2700	190	530000	9600	35	2	75	1.6	0.34	0.061	0.0065	0.0021	0.0018	0.0014	220	19	0.15	0.023	0.26	0.049		135.272	300	0.0008	0.163	0.009		46.4433	6.88665	0.417867	7.24064		60.317	7.99794		44.0396		52.4369	9.05661	1.12905	9.13787		46.4433	6.88665	0.885699	9.13787		59.0602
24	ECDF12	2800	200	520000	8400	35	2	75	1.8	0.33	0.068	0.0072	0.0025	0.0012	0.0013	210	17	0.14	0.021	0.23	0.049		162.858	340.163	0.0007	0.16	0.01		42.0351	7.60374	0.481118	8.74188		51.9862	11.0257		39.8596		44.7425	10.2039	1.06441	9.83614		42.0351	7.60374	0.93949	9.83614		59.9414
25	ECDF13	2800	170	520000	10000	35	2	76	1.9	0.33	0.064	0.012	0.0029	0.0014	0.0016	230	19	0.2	0.03	0.34	0.077		183.051	431.46	0.0007	0.144	0.011		36.0736	7.92648	0.493873	8.21681		57.1136	12.4987		34.2066		33.1406	8.05078	0.918695	7.81009		36.0736	7.92648	1.0885	7.81009		52.7433
26	ECDF14	2800	170	520000	9700	33	1.9	77	2.1	0.32	0.072	0.0086	0.0025	0.002	0.0014	220	19	0.19	0.026	0.2	0.056		172.643	397.651	0.0004	0.106	0.01		30.1214	9.51362	0.52345	9.53664		58.8158	17.8096		28.5625		27.567	9.20351	0.915195	10.7323		30.1214	9.51362	1.09266	10.7323		62.5445
27	ECDF15	2900	200	520000	9900	31	2.4	75	1.7	0.32	0.07	0.0058	0.0018	0.001	0.0011	210	17	0.19	0.035	0.15	0.051		154.652	369.786	0.0002	0.071	0.01		21.8005	9.16281	0.559446	9.56642		65.1393	25.7428		20.6722		18.0957	11.0667	0.830056	10.364		21.8005	9.16281	1.20474	10.364		65.0844
28	ECDF16	3000	210	520000	9800	28	1.9	77	1.9	0.29	0.055	0.0041	0.0016	0.00069	0.0012	230	20	0.22	0.035	0.072	0.023		133.505	335.227	0.0001	0.043	0.008		15.4924	8.83149	0.548126	9.95864		98.6318	36.7384		14.6906		12.5373	10.597	0.8092	9.80533		15.4924	8.83149	1.23579	9.80533		83.1936
29	ECDF17	3100	180	530000	9300	28	1.4	79	2.3	0.32	0.059	0.0035	0.0015	0.00061	0.001	240	21	0.26	0.049	0.052	0.018		147.557	355.244	0	0.029	0.008		12.1217	10.4578	0.659776	10.4757		36.4889	58.0707		11.4943		8.98462	9.20211	0.741175	10.3321		12.1217	10.4578	1.34921	10.3321		67.6449
30	ECDF18	3200	140	530000	9800	28	1	79	2	0.31	0.065	0.0023	0.0012	2.7e-05	0.0011	240	20	0.22	0.033	0.028	0.0063		147.402	382.354	0	0.02	0.009		7.3653	10.062	0.621481	10.2105		110.437	87.7999		6.98411		5.02581	8.79032	0.682347	8.85297		7.3653	10.062	1.46553	8.85297		45.9188
31	ECDF19	3100	140	520000	11000	27	1.1	79	2.1	0.3	0.063	0.0026	0.0012	bdl	0.0011	230	21	0.23	0.035	0.015	0.0031		142.31	327.052	0	0.012	0.008		5.02691	9.72732	0.650604	8.53125		105.46	114.172		4.76674		3.63147	8.60836	0.722394	7.49276		5.02691	9.72732	1.38429	7.49276		133.499
32	ECDF20	3100	140	530000	10000	28	1	80	2.3	0.31	0.048	0.0012	0.00084	0.00093	0.0013	250	21	0.24	0.032	0.015	0.0029		239.463	568.371	0	0.009	0.013		2.52672	9.24519	0.71069	8.77464		-21.7732	256.65		2.39595		1.61295	7.18032	0.638358	6.73995		2.52672	9.24519	1.56652	6.73995		-32.3534
[truncated: 8 more columns]

## Sheet: Q-ICP-MS Fig 9
1511	n=29 (c. 60s / 58 pixels each)																											Lower Intercept Age [Ma] ±95% conf.		283.1	9.4 / 13.1							Isochron Age [Ma] ±2s		279.8	14.9 / 17.4		86-TW Intercept Age [Ma] ±95% conf.		282.4	10.8 / 14.1
Critera:	for targeting the least altered domain: Ba_ppm_m137 < 10; Rb_ppm_m85 < 0.01; U238_CPS < 10000; Cu_ppm_m63 < 0.2																											MSWD		2.04887								MSWD		0.833734			MSWD		2.34259
	for cleaning up of low U and Pb data set as no outlier rejection routine is applied to the pooled pixels: Pb206_CPS > 0; Pb207_CPS > 0; Pb208_CPS > 0; U238_CPS > 500;Final207_206 < 1.5; Final207_206 > 0.15;Final206_208 < 10;Final206_208 > 0.1;																											207Pb/206Pbinitial		0.691818	0.0180262							206Pb/208Pbinitial		0.622639	0.0161001		208Pb/206Pbinitial		1.6079	0.0464528
Pooling channel: C207_235
	semiquantitative element data																							internal element standard: Ca as in stoechiometric CaCO3				Tera-Wasserburg columns										Isochron columns					86-TW (sensu Parrish et al., 2018)
	Mg_ppm_SQ_m25	Mg_ppm_SQ_m25_Int2SE	Ca_ppm_SQ_m43	Ca_ppm_SQ_m43_Int2SE	Mn_ppm_SQ_m55	Mn_ppm_SQ_m55_Int2SE	Fe_ppm_SQ_m57	Fe_ppm_SQ_m57_Int2SE	Cu_ppm_SQ_m63	Cu_ppm_SQ_m63_Int2SE	Ga_ppm_SQ_m71	Ga_ppm_SQ_m71_Int2SE	Rb_ppm_SQ_m85	Rb_ppm_SQ_m85_Int2SE	Sr_ppm_SQ_m88	Sr_ppm_SQ_m88_Int2SE	Ba_ppm_SQ_m137	Ba_ppm_SQ_m137_Int2SE	Ce_ppm_SQ_m140	Ce_ppm_SQ_m140_Int2SE		207Pb (cps)	208Pb (cps)	Th [ppm]	U [ppm]	Pb [ppm]		238U/206Pb	±2s [%]	207Pb/206Pb	±2s [%]		207Pb-corrected age [Ma]	±2s		206Pbrad [%]		238U/208Pbc	±2s [%]	206Pbt/208Pbc	±2s [%]		238U/206Pb	±2s [%]	208Pbc/206Pbt	±2s [%]		208Pb-corrected age [Ma]	±2s
ECDFGlobal	2600	16	660000	3000	110	0.74	1100	7.1	0.052	0.0025	0.0042	0.00035	0.00073	0.00012	2800	25	5.2	0.2	0.48	0.022		239.726	551.292	0.0003	0.037	0.011		8.85125	2.55722	0.429891	3.29598		291.535	20.8296		39.9571		10.0608	4.44585	1.13666	3.14447		8.85125	2.55722	0.879772	3.14447		321.651	20.8298
ECDF0	2600	75	640000	15000	110	3.4	1100	38	0.017	0.0042	0.0029	0.0016	bdl	0.00011	2600	95	3.6	0.66	0.37	0.11		66.498	148.112	0.0001	0.06	0.006		17.784	3.32144	0.182499	5.89125		282.258	11.1593		80.2822		47.1489	12.2989	2.65119	12.5423		17.784	3.32144	0.377189	12.5423		271.646	11.7807
ECDF1	2500	83	640000	13000	110	2.5	1100	33	0.017	0.0041	0.0038	0.0017	6.3e-06	0.0002	2600	91	4.2	0.81	0.42	0.12		82.7307	150.921	0.0001	0.055	0.006		16.5863	3.93347	0.220017	5.63424		280.37	13.3973		74.8751		39.9021	9.59203	2.40573	9.91613		16.5863	3.93347	0.415674	9.91613		281.929	14.8951
ECDF2	2500	83	660000	16000	110	3.1	1100	40	0.02	0.0052	0.004	0.0021	0.00056	0.00065	2700	110	4.8	1.1	0.45	0.14		88.3932	208.122	0.0003	0.051	0.006		15.5129	4.8709	0.236766	6.1873		289.021	16.9868		70.0298		27.9382	10.6704	1.80096	10.7196		15.5129	4.8709	0.555259	10.7196		266.465	19.8247
ECDF3	2600	83	650000	12000	110	3.3	1100	35	0.02	0.0049	0.0035	0.0016	0.0021	0.00098	2700	110	4.5	0.74	0.38	0.097		101.656	177.008	0.0001	0.051	0.007		14.653	4.06084	0.254045	5.32004		294.297	15.301		66.1478		31.0832	7.67059	2.12129	7.88224		14.653	4.06084	0.471412	7.88224		303.69	17.4099
ECDF4	2600	64	660000	18000	110	3.3	1100	40	0.023	0.006	0.0028	0.0016	bdl	0.00016	2900	140	5.5	0.99	0.32	0.081		109.119	210.829	0.0002	0.048	0.007		13.827	5.70498	0.272042	6.69678		298.996	21.6085		62.4192		26.9845	13.1367	1.95158	11.1574		13.827	5.70498	0.512407	11.1574		310.067	25.6767
ECDF5	2600	83	650000	17000	110	3.4	1100	43	0.033	0.0079	0.0035	0.0019	0.00059	0.00065	2600	110	5.5	1.1	0.61	0.16		125.267	248.111	0.0003	0.05	0.008		13.2608	4.42333	0.294715	5.60971		294.976	18.3935		59.8629		21.8601	7.46257	1.64848	7.20792		13.2608	4.42333	0.60662	7.20792		295.832	21.1529
ECDF6	2600	100	660000	18000	110	4	1100	35	0.022	0.0054	0.0053	0.0022	0.00014	0.00043	2700	100	4.6	1.1	0.52	0.13		115.607	242.416	0.0003	0.041	0.007		12.6722	4.2602	0.309143	5.55618		297.429	19.0078		57.2061		18.7424	9.1101	1.47901	8.17271		12.6722	4.2602	0.676126	8.17271		288.252	21.5503
ECDF7	2600	62	660000	15000	100	3.6	1100	33	0.03	0.0084	0.005	0.0023	0.00033	0.00057	2800	120	6.3	1.2	0.42	0.12		131.748	269.229	0.0002	0.042	0.008		12.5855	5.65202	0.342129	6.38755		273.939	23.6774		56.8144		18.2848	9.0957	1.45285	8.36959		12.5855	5.65202	0.688302	8.36959		286.487	28.3471
ECDF8	2500	98	660000	18000	100	3.8	1100	34	0.032	0.0076	0.0053	0.002	0.00036	0.00054	2800	160	4.6	1.1	0.57	0.13		131.561	283.908	0.0003	0.038	0.007		12.8189	4.98816	0.387292	6.10665		234.612	22.6178		57.8683		15.4804	8.35278	1.20762	8.08326		12.8189	4.98816	0.828077	8.08326		239.396	25.2225
ECDF9	2600	85	660000	15000	110	4.1	1100	33	0.026	0.0063	0.0043	0.0022	0.0011	0.00079	2900	150	5.5	1.2	0.47	0.15		142.388	319.862	0.0002	0.038	0.008		10.9105	5.74868	0.356935	6.61657		302.251	28.211		49.2529		13.7927	11.3815	1.26417	9.86321		10.9105	5.74868	0.791031	9.86321		293.394	33.4321
ECDF10	2600	84	640000	16000	110	3.8	1100	34	0.038	0.011	0.0052	0.0019	0.00073	0.00074	2700	120	6.1	1.2	0.47	0.11		161.564	358.992	0.0002	0.039	0.009		11.0743	4.18791	0.395775	5.30698		263.676	23.1133		49.9924		12.9665	8.25885	1.17087	6.89473		11.0743	4.18791	0.854069	6.89473		267.292	24.9088
ECDF11	2600	100	660000	15000	110	4.1	1100	37	0.044	0.0092	0.0061	0.0022	0.00091	0.00072	2800	140	6.3	1.2	0.56	0.14		194.961	434.386	0.0003	0.042	0.01		10.2251	4.57053	0.405684	5.45103		275.872	26.259		46.1589		11.4215	6.34501	1.11701	7.04617		10.2251	4.57053	0.895245	7.04617		273.545	29.2784
ECDF12	2600	83	650000	19000	110	4.9	1100	41	0.04	0.0085	0.0051	0.0023	2.4e-05	0.00023	2900	130	5.6	1.1	0.54	0.14		194.567	433.241	0.0002	0.039	0.01		10.1945	5.4378	0.440564	6.18105		243.312	31.0258		46.0208		11.0618	6.17474	1.08507	6.54077		10.1945	5.4378	0.921595	6.54077		264.409	34.5002
ECDF13	2600	97	650000	18000	100	3.8	1100	37	0.035	0.0084	0.0049	0.0021	0.00044	0.00058	2900	150	4.3	0.99	0.47	0.1		190.184	431.474	0.0002	0.035	0.01		9.1161	4.80981	0.441946	5.797		270.282	32.4609		41.1527		9.57302	7.1358	1.05012	7.3304		9.1161	4.80981	0.95227	7.3304		282.082	34.5549
ECDF14	2600	99	660000	15000	110	4.1	1100	32	0.057	0.011	0.0035	0.0018	0.00065	0.00056	2900	140	5.5	1	0.36	0.081		224.789	534.028	0.0002	0.037	0.012		8.38752	4.97668	0.447285	5.78401		287.274	35.6105		37.8637		8.02764	4.89495	0.957093	6.83772		8.38752	4.97668	1.04483	6.83772		263.681	39.2421
ECDF15	2700	92	650000	14000	110	3.9	1200	46	0.058	0.012	0.0058	0.0025	0.0011	0.00079	2900	150	5	0.92	0.52	0.12		258.824	572.83	0.0002	0.039	0.014		7.62756	6.23276	0.450558	6.81952		311.351	45.8614		34.433		7.63841	6.21547	1.00142	6.40954		7.62756	6.23276	0.998579	6.40954		312.573	52.221
ECDF16	2700	77	650000	17000	110	3.6	1100	32	0.074	0.015	0.0032	0.0016	0.0011	0.00077	2800	150	5.6	1.2	0.5	0.1		275.895	609.673	0.0005	0.038	0.014		7.67502	5.10285	0.489497	5.68248		260.052	40.8405		34.6472		7.07159	7.22372	0.921377	6.10278		7.67502	5.10285	1.08533	6.10278		267.356	44.0192
ECDF17	2600	74	660000	17000	110	5.1	1100	37	0.066	0.017	0.0045	0.0023	0.00062	0.00068	2800	130	5	1.1	0.6	0.13		298.667	664.572	0.0004	0.037	0.014		7.37636	4.95391	0.502822	5.24673		252.84	40.6832		33.299		6.63363	6.966	0.89931	7.01352		7.37636	4.95391	1.11196	7.01352		264.071	44.8086
ECDF18	2600	87	650000	21000	110	3.4	1100	31	0.067	0.013	0.0053	0.0024	0.0011	0.00081	2900	160	6	1.2	0.56	0.13		300.017	721.416	0.0003	0.034	0.015		6.35388	5.33481	0.487909	6.32181		315.84	53.4035		28.6832		5.68615	5.22303	0.89491	6.47346		6.35388	5.33481	1.11743	6.47346		302.284	55.1824
ECDF19	2600	85	660000	19000	110	3.7	1100	37	0.081	0.016	0.0053	0.002	0.00097	0.00076	2800	150	4.9	0.91	0.51	0.11		352.453	766.551	0.0004	0.035	0.017		6.29355	4.74497	0.52572	5.44139		260.354	50.4354		28.4109		5.03326	4.80768	0.799749	5.62201		6.29355	4.74497	1.25039	5.62201		223.817	51.9402
ECDF20	2700	88	650000	15000	110	4	1100	39	0.067	0.015	0.0047	0.0021	bdl	0.00024	3100	120	5.2	1.2	0.51	0.12		352.878	759.696	0.0001	0.033	0.017		5.68881	4.81648	0.529241	5.55138		281.666	56.9157		25.6809		4.89419	5.12845	0.860318	5.60986		5.68881	4.81648	1.16236	5.60986		306.592	56.7266
ECDF21	2700	96	650000	16000	110	5.3	1200	44	0.079	0.017	0.004	0.0021	0.00048	0.00065	3000	180	4.8	1.1	0.51	0.12		353.712	804.782	0.0003	0.03	0.017		5.33582	5.69788	0.536239	6.20107		287.305	67.5376		24.0874		4.34864	5.03057	0.81499	5.89386		5.33582	5.69788	1.22701	5.89386		280.026	70.6744
ECDF22	2600	74	660000	18000	110	5.7	1100	50	0.081	0.016	0.006	0.0024	0.0021	0.001	3000	130	4.7	1.2	0.73	0.18		417.405	990.812	0.0005	0.031	0.02		4.8733	4.65187	0.544555	5.02374		297.627	62.7324		21.9995		3.6196	5.6076	0.742741	5.66065		4.8733	4.65187	1.34637	5.66065		211.653	67.1184
ECDF23	2600	100	640000	20000	110	4.7	1200	50	0.078	0.014	0.005	0.0021	0.00099	0.00079	3000	140	2.7	1.7	0.49	0.11		396.041	902.026	0.0005	0.028	0.019		4.61139	5.24574	0.57193	5.77048		256.514	77.5637		20.8171		3.76481	4.32844	0.816417	4.7117		4.61139	5.24574	1.22486	4.7117		324.704	75.6183
ECDF24	2700	68	660000	14000	110	4.3	1200	39	0.11	0.021	0.0056	0.0021	5.2e-05	0.00034	3000	140	5	1.1	0.64	0.15		488.773	1110.74	0.0004	0.03	0.023		3.98971	3.49355	0.567889	4.30173		305.832	70.0526		18.0107		3.09591	3.97663	0.775975	5.08677		3.98971	3.49355	1.2887	5.08677		313.038	64.5108
ECDF25	2700	64	660000	17000	110	4.9	1200	46	0.096	0.015	0.0051	0.0017	0.00032	0.00063	2900	110	4.8	1	0.57	0.12		450.271	1068.99	0.0002	0.025	0.022		3.6192	5.18049	0.581013	5.36042		301.493	94.0367		16.3381		2.76046	5.06337	0.762726	5.2864		3.6192	5.18049	1.31109	5.2864		320.693	96.4467
ECDF26	2700	100	680000	18000	110	4.8	1200	39	0.13	0.025	0.0046	0.0022	0.0012	0.00077	2900	160	4.7	1.2	0.6	0.12		628.804	1503.38	0.0002	0.029	0.032		3.02923	4.5474	0.579088	5.22391		365.496	108.881		13.6748		2.16712	2.78365	0.715402	4.41739		3.02923	4.5474	1.39781	4.41739		272.225	105.98
ECDF27	2700	87	670000	17000	100	3.7	1100	40	0.12	0.025	0.0017	0.0011	0.00084	0.00065	2900	150	5.3	1.2	0.33	0.068		490.92	1154.91	0.0002	0.018	0.023		2.61439	5.09143	0.615299	5.84685		288.385	147.113		11.8021		1.86795	4.8353	0.714488	5.82169		2.61439	5.09143	1.3996	5.82169		311.77	133.411
ECDF28	2700	100	670000	14000	100	4.2	1100	38	0.12	0.02	0.0029	0.0015	0.0008	0.00064	2800	160	7	1.3	0.31	0.052		646.169	1473.51	0.0001	0.016	0.029		1.80446	7.12999	0.630418	5.33749		334.615	202.327		8.14585		1.22298	5.68061	0.677697	5.25964		1.80446	7.12999	1.47559	5.25964		287.77	260.156

## Sheet: PlotDat4
Source sheet	SC-ICP-MS	8.30882	0.516733	800		1600		2400		3200		4000		4800		0.832235	0.9	0.829211	0.9	7.56836	0.0657994	0	0.750011	8.72067	0.516733	7.24482	0.535841	3.12777	0.682498	5.41405	0.599295	3.8467	0.637112	14.1412	0.353441	17.76	0.256223	5.86984	0.617825	19.1366	0.182361	12.3202	0.360948	14.492	0.34009	7.41923	0.508283	6.03389	0.55132
Plot name	Concordia1	6.91461	0.535841	7.5789	0.065891	3.55492	0.0988622	2.22044	0.155085	1.55827	0.252994	1.16482	0.424439	0.906115	0.734523	0.850118	0.853005	0.850118	0.845665	3.54967	0.0987156	23.7157	0	8.71715	0.520941	7.24199	0.539495	3.12458	0.684787	5.40998	0.601876	3.84351	0.639821	14.1364	0.355827	17.7504	0.25934	5.86709	0.622346	19.1276	0.185084	12.3141	0.364917	14.4867	0.342893	7.41713	0.510232	6.02694	0.55475
Plot Type	1	2.75553	0.682498	7.57881	0.0659109	3.55487	0.0989035	2.2204	0.15517	1.55821	0.253163	1.16492	0.42482	0.906155	0.735306	0.877505	0.789686	0.877505	0.783034	2.21696	0.154833			8.70664	0.525077	7.23357	0.543088	3.11508	0.687038	5.39783	0.604412	3.83399	0.642484	14.1222	0.358172	17.7217	0.262403	5.85888	0.626789	19.1009	0.18776	12.2961	0.368819	14.471	0.345649	7.41085	0.512146	6.00622	0.558121
1st free col	81	4.93818	0.599295	7.57854	0.0659289	3.55474	0.0989416	2.22031	0.15525	1.55811	0.253318	1.16499	0.425204	0.906167	0.736077	0.906207	0.731346	0.906207	0.725317	1.5557	0.252419			8.68932	0.529071	7.21968	0.546556	3.09943	0.68921	5.37782	0.606861	3.8183	0.645056	14.0988	0.360437	17.6745	0.265361	5.84535	0.631079	19.0568	0.190344	12.2663	0.372586	14.4451	0.348309	7.4005	0.513995	5.97207	0.561376
Sigma Level	1	3.47354	0.637112	7.57809	0.0659446	3.55452	0.0989758	2.22015	0.155322	1.55796	0.253458	1.16502	0.425585	0.906149	0.736823	0.936316	0.677583	0.936316	0.67212	1.16298	0.425008			8.66549	0.532853	7.20058	0.549841	3.0779	0.691268	5.35029	0.609181	3.79671	0.647491	14.0665	0.362582	17.6095	0.268162	5.82673	0.635142	18.9962	0.192791	12.2254	0.376153	14.4095	0.350828	7.38627	0.515746	5.92509	0.564459
Absolute Errs	FALSE	13.584	0.353441	7.57748	0.0659579	3.55421	0.0990056	2.21995	0.155386	1.55778	0.25358	1.16502	0.425956	0.906104	0.737532	0.967933	0.628028	0.967933	0.623077	0.904487	0.734635			8.63556	0.53636	7.17658	0.552886	3.05084	0.693176	5.31571	0.611331	3.76959	0.649749	14.026	0.36457	17.5279	0.270759	5.80334	0.638909	18.92	0.19506	12.174	0.379461	14.3648	0.353164	7.36839	0.51737	5.86608	0.567317
Symbol Type	1	16.6365	0.256223	7.57672	0.0659684	3.55383	0.0990304	2.21969	0.15544	1.55756	0.253683	1.16499	0.426311	0.90603	0.738192	1.00117	0.582341	1.00117	0.577855	IsoLine	IsoLine			8.60004	0.539531	7.1481	0.55564	3.01874	0.694901	5.27467	0.613276	3.7374	0.651791	13.978	0.366368	17.431	0.273108	5.77559	0.642315	18.8297	0.197111	12.113	0.382452	14.3117	0.355276	7.34716	0.518838	5.79604	0.569901
Inverse Plot	TRUE	5.54806	0.617825	7.57581	0.0659761	3.55338	0.0990499	2.21938	0.155484	1.55731	0.253763	1.16491	0.426644	0.90593	0.73879	1.03615	0.540212	1.03615	0.536147					8.55954	0.542311	7.11563	0.558055	2.98213	0.696414	5.22787	0.614981	3.70071	0.653581	13.9232	0.367945	17.3205	0.275167	5.74395	0.645302	18.7266	0.19891	12.0434	0.385075	14.2511	0.357128	7.32297	0.520125	5.71617	0.572168
Color Plot	TRUE	18.0886	0.182361	7.57477	0.0659807	3.55286	0.0990636	2.21904	0.155517	1.55703	0.253821	1.16481	0.426949	0.905806	0.739318	1.07301	0.501354	1.07301	0.49767					8.51475	0.544654	7.07971	0.56009	2.94165	0.697689	5.17611	0.616418	3.66012	0.65509	13.8626	0.369273	17.1983	0.276903	5.70895	0.647819	18.6126	0.200426	11.9665	0.387285	14.1842	0.358689	7.29621	0.52121	5.62785	0.574077
3D plot	FALSE	11.6128	0.360948	7.57362	0.0659823	3.55229	0.0990714	2.21866	0.155538	1.55673	0.253855	1.16468	0.42722	0.905659	0.739765	1.11189	0.465505	1.11189	0.462167					8.46643	0.54652	7.04098	0.561709	2.89798	0.698703	5.12029	0.617562	3.61634	0.656291	13.7972	0.370331	17.0665	0.278284	5.6712	0.649823	18.4896	0.201633	11.8835	0.389044	14.112	0.359931	7.26734	0.522073	5.53258	0.575598
Linear	FALSE	13.8764	0.34009	7.57239	0.0659807	3.55167	0.0990731	2.21825	0.155548	1.55641	0.253864	1.16451	0.427454	0.905492	0.740125	1.15297	0.432425	1.15297	0.4294					8.41542	0.547875	7.00008	0.562887	2.85187	0.699441	5.06134	0.618393	3.57012	0.657164	13.7282	0.3711	16.9273	0.279288	5.63134	0.651279	18.3598	0.20251	11.7959	0.390323	14.0357	0.360834	7.23686	0.522701	5.43199	0.576703
Data Range	N170:Q197	7.17318	0.508283	7.57108	0.065976	3.55102	0.0990686	2.21781	0.155544	1.55608	0.253848	1.16432	0.427645	0.905308	0.740391	1.19642	0.401891	1.19642	0.399151					8.36258	0.548698	6.95771	0.563601	2.80412	0.699889	5.00029	0.618898	3.52225	0.657693	13.6567	0.371566	16.7832	0.279898	5.59006	0.652163	18.2254	0.203043	11.7052	0.391099	13.9567	0.361382	7.2053	0.523082	5.32781	0.577373
Filled Symbols	TRUE	5.22181	0.55132	7.56973	0.0659682	3.55035	0.0990581	2.21737	0.155529	1.55574	0.253808	1.16411	0.427792	0.905109	0.740558	1.24245	0.373702	1.24245	0.371219					8.30882	0.548974	6.91461	0.563841	2.75553	0.700039	4.93818	0.619067	3.47354	0.657871	13.584	0.371723	16.6365	0.280102	5.54806	0.652459	18.0886	0.203221	11.6128	0.391359	13.8764	0.361566	7.17318	0.52321	5.22181	0.577598
ConcAge	FALSE	11.3643	0.374146	7.56836	0.0659576	3.54966	0.0990418	2.21691	0.155502	1.5554	0.253745	1.16388	0.427891	0.9049	0.740624	1.2913	0.34767	1.2913	0.34542					8.25507	0.548698	6.87151	0.563601	2.70694	0.699889	4.87607	0.618898	3.42483	0.657693	13.5113	0.371566	16.4899	0.279898	5.50605	0.652163	17.9518	0.203043	11.5205	0.391099	13.796	0.361382	7.14107	0.523082	5.11581	0.577373
ConcSwap	FALSE	7.94795	0.481613	7.56698	0.0659443	3.54898	0.0990199	2.21646	0.155463	1.55507	0.253658	1.16363	0.427941	0.904684	0.740587	1.34322	0.323624	1.34322	0.321586					8.20223	0.547875	6.82915	0.562887	2.65919	0.699441	4.81502	0.618393	3.37696	0.657164	13.4398	0.3711	16.3457	0.279288	5.46477	0.651279	17.8173	0.20251	11.4298	0.390323	13.7171	0.360834	7.1095	0.522701	5.01163	0.576703
1st Symbol-row	1	6.48239	0.542527	7.56563	0.0659285	3.5483	0.0989928	2.21601	0.155414	1.55475	0.25355	1.16337	0.42794	0.904465	0.740449	1.3985	0.301407	1.3985	0.29956					8.15122	0.54652	6.78825	0.561709	2.61308	0.698703	4.75607	0.617562	3.33074	0.656291	13.3708	0.370331	16.2066	0.278284	5.42491	0.649823	17.6875	0.201633	11.3421	0.389044	13.6408	0.359931	7.07902	0.522073	4.91104	0.575598
		3.57919	0.65497	7.56432	0.0659105	3.54765	0.0989609	2.21558	0.155355	1.55445	0.253423	1.1631	0.427889	0.904246	0.740211	1.45748	0.280873	1.45748	0.279201					8.1029	0.544654	6.74951	0.56009	2.56941	0.697689	4.70025	0.616418	3.28696	0.65509	13.3054	0.369273	16.0748	0.276903	5.38716	0.647819	17.5646	0.200426	11.2592	0.387285	13.5686	0.358689	7.05016	0.52121	4.81577	0.574077
		14.7654	0.318244	7.56309	0.0658906	3.54704	0.0989248	2.21518	0.155286	1.55416	0.253279	1.16284	0.427789	0.904031	0.739878	1.52051	0.261891	1.52051	0.260375					8.05811	0.542311	6.7136	0.558055	2.52893	0.696414	4.64849	0.614981	3.24638	0.653581	13.2448	0.367945	15.9526	0.275167	5.35217	0.645302	17.4506	0.19891	11.1822	0.385075	13.5016	0.357128	7.0234	0.520125	4.72745	0.572168
		12.7672	0.342127	7.56194	0.0658691	3.54647	0.0988852	2.2148	0.15521	1.5539	0.25312	1.16257	0.427642	0.903824	0.739455	1.58803	0.244337	1.58803	0.242964					8.0176	0.539531	6.68112	0.55564	2.49232	0.694901	4.60169	0.613276	3.20968	0.651791	13.19	0.366368	15.8421	0.273108	5.32052	0.642315	17.3475	0.197111	11.1127	0.382452	13.4411	0.355276	6.9992	0.518838	4.64759	0.569901
		5.98722	0.555548	7.5609	0.0658465	3.54595	0.0988426	2.21447	0.155128	1.55368	0.252949	1.16231	0.427449	0.903628	0.738949	1.66053	0.2281	1.66053	0.226857					7.98208	0.53636	6.65264	0.552886	2.46021	0.693176	4.56065	0.611331	3.17749	0.649749	13.142	0.36457	15.7452	0.270759	5.29277	0.638909	17.2571	0.19506	11.0517	0.379461	13.388	0.353164	6.97798	0.51737	4.57755	0.567317
		13.6421	0.295468	7.55999	0.065823	3.5455	0.0987979	2.21417	0.15504	1.55348	0.252769	1.16207	0.427215	0.903447	0.73837	1.73856	0.213076	1.73856	0.21195					7.95216	0.532853	6.62865	0.549841	2.43316	0.691268	4.52607	0.609181	3.15037	0.647491	13.1015	0.362582	15.6635	0.268162	5.26938	0.635142	17.181	0.192791	11.0003	0.376153	13.3433	0.350828	6.9601	0.515746	4.51853	0.564459
		9.69239	0.433607	7.55923	0.0657991	3.54512	0.0987518	2.21392	0.154949	1.55333	0.252583	1.16184	0.426943	0.903284	0.737727	1.82277	0.199171	1.82277	0.19815					7.92833	0.529071	6.60954	0.546556	2.41163	0.68921	4.49854	0.606861	3.12879	0.645056	13.0692	0.360437	15.5985	0.265361	5.25076	0.631079	17.1203	0.190344	10.9593	0.372586	13.3076	0.348309	6.94586	0.513995	4.47155	0.561376
		8.1491	0.499437	7.55862	0.0657753	3.54482	0.0987051	2.21373	0.154856	1.55322	0.252394	1.16163	0.426637	0.903141	0.737031	1.91391	0.186297	1.91391	0.185372					7.91101	0.525077	6.59566	0.543088	2.39598	0.687038	4.47853	0.604412	3.1131	0.642484	13.0458	0.358172	15.5513	0.262403	5.23724	0.626789	17.0763	0.18776	10.9296	0.368819	13.2818	0.345649	6.93552	0.512146	4.43741	0.558121
		5.28738	0.578241	7.55818	0.0657518	3.5446	0.0986585	2.21359	0.154763	1.55315	0.252206	1.16144	0.426304	0.903021	0.736294	2.01285	0.174373	2.01285	0.173536					7.9005	0.520941	6.58723	0.539495	2.38648	0.684787	4.46639	0.601876	3.10357	0.639821	13.0316	0.355827	15.5226	0.25934	5.22902	0.622346	17.0495	0.185084	10.9115	0.364917	13.2661	0.342893	6.92924	0.510232	4.41668	0.55475
		18.2929	0.130096	7.55791	0.0657292	3.54447	0.0986129	2.21351	0.15467	1.55312	0.252021	1.16128	0.425949	0.902927	0.735528	2.12063	0.163326	2.12063	0.162568					7.89698	0.516733	6.58441	0.535841	2.38329	0.682498	4.46231	0.599295	3.10038	0.637112	13.0268	0.353441	15.513	0.256223	5.22627	0.617825	17.0406	0.182361	10.9055	0.360948	13.2608	0.34009	6.92714	0.508283	4.40973	0.55132
		11.8791	0.372983	7.55782	0.0657077	3.54442	0.0985691	2.21348	0.154581	1.55313	0.251843	1.16114	0.425578	0.902859	0.734748	2.23847	0.153089	2.23847	0.152402					7.9005	0.512524	6.58723	0.532186	2.38648	0.680208	4.46639	0.596714	3.10357	0.634402	13.0316	0.351054	15.5226	0.253106	5.22902	0.613304	17.0495	0.179638	10.9115	0.356978	13.2661	0.337287	6.92924	0.506335	4.41668	0.54789
		6.51797	0.522461	7.55791	0.0656879	3.54447	0.0985278	2.21352	0.154496	1.5532	0.251675	1.16104	0.425196	0.902819	0.733965	2.36783	0.143597	2.36783	0.142975					7.91101	0.508388	6.59566	0.528594	2.39598	0.677958	4.47853	0.594178	3.1131	0.631739	13.0458	0.348709	15.5513	0.250042	5.23724	0.608861	17.0763	0.176962	10.9296	0.353077	13.2818	0.334532	6.93552	0.50442	4.43741	0.544519
		6.12933	0.52669	7.55818	0.0656699	3.5446	0.0984896	2.21361	0.154416	1.5533	0.251519	1.16098	0.424812	0.902808	0.733194	2.51046	0.134795	2.51046	0.134231					7.92833	0.504394	6.60954	0.525125	2.41163	0.675785	4.49854	0.591729	3.12879	0.629167	13.0692	0.346445	15.5985	0.247084	5.25076	0.604571	17.1203	0.174378	10.9593	0.34931	13.3076	0.331872	6.94586	0.502571	4.47155	0.541264
		IsoLine	IsoLine	7.55862	0.0656541	3.54482	0.0984554	2.21377	0.154344	1.55344	0.251379	1.16094	0.424431	0.902825	0.732448	2.66848	0.126629	2.66848	0.126118					7.95216	0.500612	6.62865	0.52184	2.43316	0.673727	4.52607	0.589409	3.15037	0.626732	13.1015	0.3443	15.6635	0.244283	5.26938	0.600508	17.181	0.171931	11.0003	0.345742	13.3433	0.329353	6.9601	0.50082	4.51853	0.538181
				7.55923	0.0656409	3.54513	0.0984256	2.21397	0.15428	1.55363	0.251257	1.16094	0.42406	0.902871	0.731738	2.84452	0.11905	2.84452	0.118588					7.98208	0.497105	6.65264	0.518795	2.46021	0.67182	4.56065	0.587259	3.17749	0.624474	13.142	0.342311	15.7452	0.241686	5.29277	0.596741	17.2571	0.169662	11.0517	0.342434	13.388	0.327017	6.97798	0.499197	4.57755	0.535323
				7.56	0.0656303	3.54551	0.0984008	2.21423	0.154226	1.55385	0.251155	1.16098	0.423705	0.902944	0.731079	3.04179	0.112013	3.04179	0.111595					8.0176	0.493934	6.68112	0.516041	2.49232	0.670095	4.60169	0.585315	3.20968	0.622432	13.19	0.340513	15.8421	0.239337	5.32052	0.593335	17.3475	0.16761	11.1127	0.339444	13.4411	0.324905	6.9992	0.497729	4.64759	0.532739
				7.56091	0.0656227	3.54597	0.0983814	2.21454	0.154182	1.5541	0.251074	1.16105	0.423372	0.903044	0.73048	3.26437	0.105478	3.26437	0.105099					8.05811	0.491154	6.7136	0.513626	2.52893	0.668582	4.64849	0.583609	3.24638	0.620642	13.2448	0.338937	15.9526	0.237278	5.35217	0.590348	17.4506	0.165811	11.1822	0.336821	13.5016	0.323053	7.0234	0.496441	4.72745	0.530473
				7.56194	0.065618	3.54648	0.0983676	2.21488	0.154149	1.55438	0.251016	1.16116	0.423068	0.903168	0.729953	3.5174	0.0994057	3.5174	0.0990623					8.1029	0.488811	6.74951	0.511592	2.56941	0.667307	4.70025	0.582172	3.28696	0.619133	13.3054	0.337608	16.0748	0.235543	5.38716	0.587831	17.5646	0.164295	11.2592	0.334611	13.5686	0.321492	7.05016	0.495357	4.81577	0.528563
				7.56309	0.0656165	3.54705	0.0983599	2.21526	0.154128	1.55468	0.250983	1.16129	0.422796	0.903315	0.729505	3.80756	0.0937613	3.80756	0.0934504					8.15122	0.486945	6.78825	0.509972	2.61308	0.666292	4.75607	0.581029	3.33074	0.617932	13.3708	0.33655	16.2066	0.234161	5.42491	0.585827	17.6875	0.163088	11.3421	0.332851	13.6408	0.32025	7.07902	0.494493	4.91104	0.527043
				7.56432	0.0656181	3.54767	0.0983582	2.21567	0.154118	1.55499	0.250973	1.16145	0.422563	0.903482	0.729146	4.14361	0.0885127	4.14361	0.0882311					8.20223	0.48559	6.82915	0.508794	2.65919	0.665555	4.81502	0.580197	3.37696	0.617059	13.4398	0.335782	16.3457	0.233157	5.46477	0.584371	17.8173	0.162211	11.4298	0.331573	13.7171	0.319347	7.1095	0.493865	5.01163	0.525938
				7.56563	0.0656228	3.54832	0.0983626	2.21611	0.154122	1.55532	0.250989	1.16164	0.422371	0.903667	0.72888	4.53731	0.08363	4.53731	0.083375					8.25507	0.484767	6.87151	0.50808	2.70694	0.665107	4.87607	0.579693	3.42483	0.61653	13.5113	0.335315	16.4899	0.232548	5.50605	0.583487	17.9518	0.161679	11.5205	0.330797	13.796	0.318799	7.14107	0.493484	5.11581	0.525267
				7.56698	0.0656305	3.54899	0.0983731	2.21655	0.154137	1.55566	0.251029	1.16186	0.422224	0.903865	0.728713	5.00482	0.0790859	5.00482	0.078855					8.30882	0.484491	6.91461	0.50784	2.75553	0.664957	4.93818	0.579524	3.47354	0.616352	13.584	0.335159	16.6365	0.232343	5.54806	0.583191	18.0886	0.161501	11.6128	0.330536	13.8764	0.318615	7.17318	0.493357	5.22181	0.525042
				7.56836	0.0656411	3.54968	0.0983894	2.21701	0.154164	1.556	0.251093	1.16209	0.422125	0.904074	0.728647	5.56894	0.074855	5.56894	0.0746459					8.36258	0.484767	6.95771	0.50808	2.80412	0.665107	5.00029	0.579693	3.52225	0.61653	13.6567	0.335315	16.7832	0.232548	5.59006	0.583487	18.2254	0.161679	11.7052	0.330797	13.9567	0.318799	7.2053	0.493484	5.32781	0.525267
				7.56973	0.0656544	3.55037	0.0984114	2.21746	0.154203	1.55633	0.251179	1.16234	0.422075	0.90429	0.728684	6.26297	0.070914	6.26297	0.0707246					8.41542	0.48559	7.00008	0.508794	2.85187	0.665555	5.06134	0.580197	3.57012	0.617059	13.7282	0.335782	16.9273	0.233157	5.63134	0.584371	18.3598	0.162211	11.7959	0.331573	14.0357	0.319347	7.23686	0.493865	5.43199	0.525938
				7.57109	0.0656702	3.55104	0.0984385	2.21791	0.154252	1.55665	0.251287	1.1626	0.422076	0.904509	0.728822	7.13748	0.0672414	7.13748	0.06707					8.46643	0.486945	7.04098	0.509972	2.89798	0.666292	5.12029	0.581029	3.61634	0.617932	13.7972	0.33655	17.0665	0.234161	5.6712	0.585827	18.4896	0.163088	11.8835	0.332851	14.112	0.32025	7.26734	0.494493	5.53258	0.527043
				7.57239	0.0656882	3.55169	0.0984703	2.21833	0.154311	1.55696	0.251414	1.16286	0.422127	0.904728	0.72906	8.27317	0.0638174	8.27317	0.0636622					8.51475	0.488811	7.07971	0.511592	2.94165	0.667307	5.17611	0.582172	3.66012	0.619133	13.8626	0.337608	17.1983	0.235543	5.70895	0.587831	18.6126	0.164295	11.9665	0.334611	14.1842	0.321492	7.29621	0.495357	5.62785	0.528563
				7.57363	0.0657081	3.5523	0.0985064	2.21874	0.15438	1.55724	0.251558	1.16313	0.422227	0.904943	0.729393	9.80738	0.0606237	9.80738	0.0604831					8.55954	0.491154	7.11563	0.513626	2.98213	0.668582	5.22787	0.583609	3.70071	0.620642	13.9232	0.338937	17.3205	0.237278	5.74395	0.590348	18.7266	0.165811	12.0434	0.336821	14.2511	0.323053	7.32297	0.496441	5.71617	0.530473
				7.57477	0.0657296	3.55287	0.0985461	2.21911	0.154456	1.5575	0.251717	1.16339	0.422374	0.90515	0.729816	11.9941	0.0576434	11.9941	0.0575161					8.60004	0.493934	7.1481	0.516041	3.01874	0.670095	5.27467	0.585315	3.7374	0.622432	13.978	0.340513	17.431	0.239337	5.77559	0.593335	18.8297	0.16761	12.113	0.339444	14.3117	0.324905	7.34716	0.497729	5.79604	0.532739
				7.57581	0.0657523	3.55339	0.0985886	2.21945	0.154538	1.55773	0.251888	1.16365	0.422567	0.905346	0.730322	15.3613	0.0548609	15.3613	0.0547457					8.63556	0.497105	7.17658	0.518795	3.05084	0.67182	5.31571	0.587259	3.76959	0.624474	14.026	0.342311	17.5279	0.241686	5.80334	0.596741	18.92	0.169662	12.174	0.342434	14.3648	0.327017	7.36839	0.499197	5.86608	0.535323
				7.57672	0.0657757	3.55384	0.0986333	2.21975	0.154626	1.55792	0.252068	1.1639	0.422801	0.905527	0.730901	21.2175	0.0522618	21.2175	0.0521575					8.66549	0.500612	7.20058	0.52184	3.0779	0.673727	5.35029	0.589409	3.79671	0.626732	14.0665	0.3443	17.6095	0.244283	5.82673	0.600508	18.9962	0.171931	12.2254	0.345742	14.4095	0.329353	7.38627	0.50082	5.92509	0.538181
				7.57748	0.0657996	3.55422	0.0986794	2.21999	0.154717	1.55807	0.252254	1.16413	0.423073	0.90569	0.731544	24	0.0517305	24	0.0516283					8.68932	0.504394	7.21968	0.525125	3.09943	0.675785	5.37782	0.591729	3.8183	0.629167	14.0988	0.346445	17.6745	0.247084	5.84535	0.604571	19.0568	0.174378	12.2663	0.34931	14.4451	0.331872	7.4005	0.502571	5.97207	0.541264
				7.57809	0.0658235	3.55452	0.0987262	2.22019	0.15481	1.55819	0.252443	1.16434	0.423379	0.905833	0.73224	IsoLine	IsoLine	24	0.0518326					8.70664	0.508388	7.23357	0.528594	3.11508	0.677958	5.39783	0.594178	3.83399	0.631739	14.1222	0.348709	17.7217	0.250042	5.85888	0.608861	19.1009	0.176962	12.2961	0.353077	14.471	0.334532	7.41085	0.50442	6.00622	0.544519
				7.57854	0.0658469	3.55474	0.0987727	2.22033	0.154903	1.55826	0.252632	1.16453	0.423712	0.905953	0.732977			21.2175	0.0523661					8.71715	0.512524	7.24199	0.532186	3.12458	0.680208	5.40998	0.596714	3.84351	0.634402	14.1364	0.351054	17.7504	0.253106	5.86709	0.613304	19.1276	0.179638	12.3141	0.356978	14.4867	0.337287	7.41713	0.506335	6.02694	0.54789
				7.57881	0.0658696	3.55488	0.0988183	2.22041	0.154996	1.55829	0.252816	1.16469	0.424067	0.906047	0.733742			15.3613	0.0549761					8.72067	0.516733	7.24482	0.535841	3.12777	0.682498	5.41405	0.599295	3.8467	0.637112	14.1412	0.353441	17.76	0.256223	5.86984	0.617825	19.1366	0.182361	12.3202	0.360948	14.492	0.34009	7.41923	0.508283	6.03389	0.55132
				7.5789	0.065891	3.55492	0.0988622	2.22044	0.155085	1.55827	0.252994	1.16482	0.424439	0.906115	0.734523			11.9941	0.0577706					ErrEll	ErrEll	ErrEll	ErrEll	ErrEll	ErrEll	ErrEll	ErrEll	ErrEll	ErrEll	ErrEll	ErrEll	ErrEll	ErrEll	ErrEll	ErrEll	ErrEll	ErrEll	ErrEll	ErrEll	ErrEll	ErrEll	ErrEll	ErrEll	ErrEll	ErrEll
				ConcTikEll	ConcTikEll	ConcTikEll	ConcTikEll	ConcTikEll	ConcTikEll	ConcTikEll	ConcTikEll	ConcTikEll	ConcTikEll	ConcTikEll	ConcTikEll			9.80738	0.0607642
																		8.27317	0.0639726
																		7.13748	0.0674128
																		6.26297	0.0711033
																		5.56894	0.0750641
																		5.00482	0.0793168
																		4.53731	0.083885
																		4.14361	0.0887943
																		3.80756	0.0940723
																		3.5174	0.099749
																		3.26437	0.105857
																		3.04179	0.112432
																		2.84452	0.119512
																		2.66848	0.127139
																		2.51046	0.135359
																		2.36783	0.14422
																		2.23847	0.153776
																		2.12063	0.164085
																		2.01285	0.17521
																		1.91391	0.187221
																		1.82277	0.200192
																		1.73856	0.214203
																		1.66053	0.229344
																		1.58803	0.24571
																		1.52051	0.263406
																		1.45748	0.282546
																		1.3985	0.303253
																		1.34322	0.325662
																		1.2913	0.349919
																		1.24245	0.376185
																		1.19642	0.404631
																		1.15297	0.435449
																		1.11189	0.468843
																		1.07301	0.505037
																		1.03615	0.544277
																		1.00117	0.586827
																		0.967933	0.632979
																		0.936316	0.683046
																		0.906207	0.737374
																		0.877505	0.796338
																		0.850118	0.860345
																		0.835193	0.9
																		0.829211	0.9
																		ConcBand	ConcBand
[truncated: 32 more columns]
