# Supplementary material for: Laser ablation inductively coupled plasma mass spectrometry (LA-ICP-MS) U–Pb carbonate geochronology: strategies, progress, and limitations
Source: Copernicus journal article supplement (doi:10.5194/gchron-2-33-2020), 2020-04-09
Supplement: Supplementary file [file gchron-2-33-2020-supplement-title-page.pdf › gchron-2-33-2020-supplement-title-page.pdf]

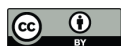

## *Supplement of*

# **Laser ablation inductively coupled plasma mass spectrometry (LA-ICP-MS) U–Pb carbonate geochronology: strategies, progress, and limitations**

**Nick M. W. Roberts et al.**

*Correspondence to:* Nick M. W. Roberts (nirob@bgs.ac.uk)

- gchron-2-33-2020-supplement-title-page.pdf
- Carbonate Strategies Supplement S1.xlsx
- Carbonate Strategies Supplement S2.docx

The copyright of individual parts of the supplement might differ from the CC BY 4.0 License.
